# Supplementary material for: Transcriptomic analysis of gills provides insights into the molecular basis of molting in Chinese mitten crab (Eriocheir sinensis)
Source: PeerJ. 2019 Jun 28;7:e7182. doi: 10.7717/peerj.7182 (PMC6601604; doi:10.7717/peerj.7182)
Supplement: Supplemental Information 1 [file peerj-07-7182-s002.xls]

## Sheet: DEG_annotation
gene_id	NR ID	NR Description
Cluster-54524.66876	KDR12444.1	Type I inositol-3,4-bisphosphate 4-phosphatase [Zootermopsis nevadensis]
Cluster-54524.66874	XP_002604312.1	hypothetical protein BRAFLDRAFT_88602 [Branchiostoma floridae]>gi|229289638|gb|EEN60323.1| hypothetical protein BRAFLDRAFT_88602 [Branchiostoma floridae]
Cluster-54524.66873	--	--
Cluster-54524.66872	XP_011555023.1	PREDICTED: uncharacterized protein LOC105386209 [Plutella xylostella]
Cluster-54524.66871	XP_008185056.1	PREDICTED: uncharacterized protein LOC103307623 [Acyrthosiphon pisum]
Cluster-54524.66870	XP_011560406.1	PREDICTED: uncharacterized protein LOC105390745 [Plutella xylostella]
Cluster-54524.155293	--	--
Cluster-54524.35794	XP_011192940.1	PREDICTED: organic cation transporter protein-like isoform X2 [Bactrocera cucurbitae]
Cluster-54524.112054	--	--
Cluster-54524.8397	--	--
Cluster-54524.16597	KHJ48876.1	DNA polymerase [Trichuris suis]
Cluster-54524.10951	KDR23515.1	hypothetical protein L798_08721 [Zootermopsis nevadensis]
Cluster-54524.16595	XP_319444.3	AGAP010253-PA [Anopheles gambiae str. PEST]>gi|116118542|gb|EAA13963.4| AGAP010253-PA [Anopheles gambiae str. PEST]
Cluster-54524.116055	--	--
Cluster-54524.116056	XP_011428865.1	PREDICTED: polycystic kidney disease protein 1-like 1 [Crassostrea gigas]
Cluster-54524.116050	KMQ98085.1	hypothetical protein RF55_1566 [Lasius niger]
Cluster-54524.16598	--	--
Cluster-54524.31942	--	--
Cluster-54524.31946	--	--
Cluster-54524.96827	EFX70646.1	hypothetical protein DAPPUDRAFT_7774, partial [Daphnia pulex]
Cluster-54524.96826	AAB64017.1	CRE-BP1 family member; cyclic AMP response element DNA-binding protein isoform 1 family [Homo sapiens]
Cluster-54524.96823	--	--
Cluster-54524.129144	--	--
Cluster-54524.129145	--	--
Cluster-54524.129146	--	--
Cluster-54524.129147	--	--
Cluster-54524.129140	--	--
Cluster-54524.129143	--	--
Cluster-54524.129148	--	--
Cluster-54524.97708	--	--
Cluster-54524.90655	--	--
Cluster-73527.0	XP_002431392.1	glycine receptor alpha-2 chain precursor, putative [Pediculus humanus corporis]>gi|212516668|gb|EEB18654.1| glycine receptor alpha-2 chain precursor, putative [Pediculus humanus corporis]
Cluster-54524.139625	--	--
Cluster-54524.29230	--	--
Cluster-54524.99934	--	--
Cluster-54524.99936	KDR12045.1	Lysosomal-associated transmembrane protein 4A [Zootermopsis nevadensis]
Cluster-54524.99932	XP_011347663.1	PREDICTED: ER membrane protein complex subunit 1 isoform X4 [Cerapachys biroi]>gi|607354189|gb|EZA48852.1| hypothetical protein X777_12768 [Cerapachys biroi]
Cluster-54524.99939	--	--
Cluster-54524.120058	--	--
Cluster-54524.14379	--	--
Cluster-54524.14375	--	--
Cluster-54524.65555	--	--
Cluster-54524.133388	XP_970503.2	PREDICTED: major facilitator superfamily domain-containing protein 6 [Tribolium castaneum]>gi|270004116|gb|EFA00564.1| hypothetical protein TcasGA2_TC003434 [Tribolium castaneum]
Cluster-54524.13688	--	--
Cluster-54524.13684	--	--
Cluster-54524.13680	--	--
Cluster-54524.133387	--	--
Cluster-54524.18505	CAX83714.1	reverse transcriptase [Schistosoma japonicum]
Cluster-54524.80604	--	--
Cluster-54524.80605	--	--
Cluster-54524.109829	--	--
Cluster-54524.80602	--	--
Cluster-54524.58127	--	--
Cluster-54524.108879	KFM74942.1	Unconventional myosin-Ie, partial [Stegodyphus mimosarum]
Cluster-54524.141329	--	--
Cluster-54524.141320	XP_002732419.1	PREDICTED: WSC domain-containing protein 1-like [Saccoglossus kowalevskii]
Cluster-75465.0	--	--
Cluster-54524.107685	--	--
Cluster-54524.107683	--	--
Cluster-54524.107682	--	--
Cluster-54524.107681	--	--
Cluster-54524.139628	--	--
Cluster-54524.107689	XP_002431520.1	conserved hypothetical protein [Pediculus humanus corporis]>gi|212516814|gb|EEB18782.1| conserved hypothetical protein [Pediculus humanus corporis]
Cluster-54524.16596	KDR18887.1	E3 ubiquitin-protein ligase arkadia-B [Zootermopsis nevadensis]
Cluster-54524.58461	--	--
Cluster-54524.58465	--	--
Cluster-54524.85729	--	--
Cluster-54524.115716	--	--
Cluster-54524.85724	--	--
Cluster-54524.85726	--	--
Cluster-54524.85727	XP_012256293.1	PREDICTED: uncharacterized protein LOC105686229 isoform X2 [Athalia rosae]
Cluster-54524.85723	--	--
Cluster-54524.140050	--	--
Cluster-54524.94650	--	--
Cluster-54524.94651	--	--
Cluster-54524.94656	--	--
Cluster-54524.36325	--	--
Cluster-54524.80411	--	--
Cluster-54524.81720	XP_008198967.1	PREDICTED: follistatin-related protein 5-like [Tribolium castaneum]
Cluster-54524.81721	--	--
Cluster-54524.81723	XP_002428185.1	diaphanous, putative [Pediculus humanus corporis]>gi|212512728|gb|EEB15447.1| diaphanous, putative [Pediculus humanus corporis]
Cluster-54524.81724	--	--
Cluster-54524.81725	XP_012946972.1	PREDICTED: Williams-Beuren syndrome chromosomal region 27 protein-like [Aplysia californica]
Cluster-54524.81726	XP_011677655.1	PREDICTED: RNA-directed DNA polymerase from mobile element jockey-like [Strongylocentrotus purpuratus]
Cluster-54524.137332	--	--
Cluster-54524.46823	--	--
Cluster-54524.46828	XP_007902081.1	PREDICTED: mini-chromosome maintenance complex-binding protein [Callorhinchus milii]
Cluster-54524.101337	--	--
Cluster-54524.96822	XP_003708039.1	PREDICTED: epidermal growth factor receptor isoform X1 [Megachile rotundata]>gi|805823778|ref|XP_012151846.1| PREDICTED: epidermal growth factor receptor isoform X1 [Megachile rotundata]
Cluster-54524.86205	--	--
Cluster-54524.112774	XP_008198129.1	PREDICTED: CUGBP Elav-like family member 4 [Tribolium castaneum]
Cluster-54524.112777	AKF17681.1	insulin-like receptor [Macrobrachium rosenbergii]
Cluster-54524.112770	--	--
Cluster-54524.112772	KDR15005.1	hypothetical protein L798_10696 [Zootermopsis nevadensis]
Cluster-79454.0	--	--
Cluster-54524.112779	AKF17681.1	insulin-like receptor [Macrobrachium rosenbergii]
Cluster-54524.112778	ENN72270.1	hypothetical protein YQE_11131, partial [Dendroctonus ponderosae]>gi|478267710|gb|ENN83091.1| hypothetical protein YQE_00548, partial [Dendroctonus ponderosae]
Cluster-54524.56222	XP_005112064.1	PREDICTED: hydroxymethylglutaryl-CoA synthase 1-like [Aplysia californica]
Cluster-54524.56225	--	--
Cluster-54524.62174	--	--
Cluster-54524.48686	--	--
Cluster-54524.16330	--	--
Cluster-78497.0	KFB51162.1	calmodulin-binding protein trpl [Anopheles sinensis]
Cluster-54524.115270	--	--
Cluster-54524.99766	--	--
Cluster-54524.115277	XP_009048429.1	hypothetical protein LOTGIDRAFT_180365 [Lottia gigantea]>gi|556112241|gb|ESP00893.1| hypothetical protein LOTGIDRAFT_180365 [Lottia gigantea]
Cluster-54524.40054	--	--
Cluster-54524.40050	--	--
Cluster-54524.8809	--	--
Cluster-54524.55754	--	--
Cluster-54524.35004	KFB47140.1	AGAP005942-PA-like protein [Anopheles sinensis]
Cluster-54524.68984	--	--
Cluster-54524.145965	--	--
Cluster-54524.30568	--	--
Cluster-54524.30567	--	--
Cluster-54524.30564	XP_012944355.1	PREDICTED: angiotensin-converting enzyme-like [Aplysia californica]
Cluster-54524.117659	--	--
Cluster-54524.117658	XP_010735751.1	PREDICTED: kinetochore protein Spc25 [Larimichthys crocea]>gi|808857253|gb|KKF09860.1| Kinetochore protein Spc25 [Larimichthys crocea]
Cluster-54524.110387	ERL89765.1	hypothetical protein D910_07126 [Dendroctonus ponderosae]
Cluster-54524.110384	--	--
Cluster-54524.110385	XP_968153.2	PREDICTED: uncharacterized protein LOC656535 [Tribolium castaneum]
Cluster-54524.110380	XP_006260097.1	PREDICTED: copine-8-like [Alligator mississippiensis]
Cluster-54524.110388	NP_001116809.1	low density lipoprotein receptor-related protein-like protein precursor [Bombyx mori]>gi|169643681|dbj|BAG12564.1| low density lipoprotein receptor-related protein-like protein [Bombyx mori]
Cluster-54524.126061	--	--
Cluster-54524.106030	--	--
Cluster-54524.89512	--	--
Cluster-54524.18073	--	--
Cluster-54524.18070	--	--
Cluster-71134.0	--	--
Cluster-54524.120998	--	--
Cluster-54524.120999	CAJ58681.1	innexin inx1 [Homarus gammarus]
Cluster-54524.120994	KFM76945.1	hypothetical protein X975_00950, partial [Stegodyphus mimosarum]
Cluster-54524.120997	--	--
Cluster-70393.0	--	--
Cluster-54524.120991	--	--
Cluster-54524.120992	--	--
Cluster-54524.120993	--	--
Cluster-54524.45143	--	--
Cluster-54524.126454	--	--
Cluster-54524.155318	--	--
Cluster-54524.16563	--	--
Cluster-54524.5194	--	--
Cluster-54524.157479	--	--
Cluster-54524.57862	--	--
Cluster-54524.57863	--	--
Cluster-54524.85254	--	--
Cluster-54524.85255	--	--
Cluster-54524.85256	--	--
Cluster-54524.29655	--	--
Cluster-54524.85250	KDR15673.1	Leucine-rich repeat-containing protein 68 [Zootermopsis nevadensis]
Cluster-54524.85258	--	--
Cluster-54524.85259	--	--
Cluster-54524.62659	--	--
Cluster-71366.0	AAK66762.1	proprotein convertase 2 [Heterodera glycines]
Cluster-54524.124190	EFX83258.1	hypothetical protein DAPPUDRAFT_48062, partial [Daphnia pulex]
Cluster-54524.124193	XP_011705435.1	PREDICTED: sodium-dependent nutrient amino acid transporter 1-like isoform X2 [Wasmannia auropunctata]
Cluster-54524.155200	--	--
Cluster-54524.106172	--	--
Cluster-54524.127421	XP_003742488.1	PREDICTED: RNA-directed DNA polymerase from mobile element jockey-like [Metaseiulus occidentalis]
Cluster-54524.127422	--	--
Cluster-54524.127425	--	--
Cluster-54524.127429	--	--
Cluster-54524.126773	--	--
Cluster-54524.126777	--	--
Cluster-54524.126779	--	--
Cluster-54524.87157	--	--
Cluster-54524.55722	--	--
Cluster-2960.0	--	--
Cluster-54524.55724	--	--
Cluster-54524.133028	XP_005294352.1	PREDICTED: uncharacterized protein LOC101948872 [Chrysemys picta bellii]>gi|530605248|ref|XP_005294353.1| PREDICTED: uncharacterized protein LOC101948872 [Chrysemys picta bellii]>gi|641779155|ref|XP_008172470.1| PREDICTED: uncharacterized protein LOC101948872 [Chrysemys picta bellii]
Cluster-54524.133026	--	--
Cluster-54524.133023	KFM64102.1	FGGY carbohydrate kinase domain-containing protein, partial [Stegodyphus mimosarum]
Cluster-54524.131886	AGV28718.1	6-4 photolyase [Eurydice pulchra]
Cluster-54524.131887	--	--
Cluster-54524.53554	--	--
Cluster-54524.53556	--	--
Cluster-54524.52836	--	--
Cluster-54524.59677	XP_012063471.1	PREDICTED: cysteine and histidine-rich protein 1 homolog [Atta cephalotes]
Cluster-54524.59673	EFX79309.1	hypothetical protein DAPPUDRAFT_52567 [Daphnia pulex]
Cluster-54524.53553	--	--
Cluster-54524.122105	--	--
Cluster-54524.122106	--	--
Cluster-54524.122108	--	--
Cluster-54524.84392	EFX71627.1	hypothetical protein DAPPUDRAFT_327039 [Daphnia pulex]
Cluster-54524.84393	EKC32269.1	Xaa-Pro aminopeptidase 1 [Crassostrea gigas]
Cluster-54524.84391	--	--
Cluster-54524.84395	--	--
Cluster-54524.86738	--	--
Cluster-54524.86730	--	--
Cluster-54524.86736	KDR15916.1	Paraplegin [Zootermopsis nevadensis]
Cluster-54524.86737	KFM69936.1	hypothetical protein X975_06017, partial [Stegodyphus mimosarum]
Cluster-54524.86734	XP_789433.2	PREDICTED: arachidonate 5-lipoxygenase [Strongylocentrotus purpuratus]
Cluster-54524.86735	XP_001813433.1	PREDICTED: paraplegin [Tribolium castaneum]>gi|270004289|gb|EFA00737.1| hypothetical protein TcasGA2_TC003619 [Tribolium castaneum]
Cluster-54524.141281	--	--
Cluster-54524.141283	--	--
Cluster-54524.141284	--	--
Cluster-54524.34224	--	--
Cluster-54524.34226	--	--
Cluster-54524.125453	XP_320177.4	AGAP012381-PA [Anopheles gambiae str. PEST]>gi|157013031|gb|EAA00140.4| AGAP012381-PA [Anopheles gambiae str. PEST]
Cluster-54524.132057	--	--
Cluster-54524.35261	--	--
Cluster-54524.32557	--	--
Cluster-54524.37759	AKP18003.1	chitinase 4 [Eriocheir sinensis]
Cluster-54524.32556	--	--
Cluster-54524.37754	XP_012936265.1	PREDICTED: sorting nexin-14-like isoform X4 [Aplysia californica]
Cluster-54524.37755	XP_007484345.1	PREDICTED: sorting nexin-14 isoform X3 [Monodelphis domestica]
Cluster-54524.37756	KDR16207.1	Sorting nexin-14 [Zootermopsis nevadensis]
Cluster-54524.37757	XP_012936265.1	PREDICTED: sorting nexin-14-like isoform X4 [Aplysia californica]
Cluster-54524.92895	ELU01947.1	hypothetical protein CAPTEDRAFT_158323 [Capitella teleta]
Cluster-54524.134642	KDR15738.1	Condensin complex subunit 1 [Zootermopsis nevadensis]
Cluster-11719.1	--	--
Cluster-54524.105149	--	--
Cluster-54524.105147	XP_002590845.1	hypothetical protein BRAFLDRAFT_125713 [Branchiostoma floridae]>gi|229276042|gb|EEN46856.1| hypothetical protein BRAFLDRAFT_125713 [Branchiostoma floridae]
Cluster-54524.105142	DAA34500.1	TPA_inf: glutamate transporter EAAC1-interacting protein GTRAP3-18 [Amblyomma variegatum]
Cluster-54524.133812	--	--
Cluster-54524.119179	--	--
Cluster-54524.70657	--	--
Cluster-54524.111368	XP_005813450.1	PREDICTED: uncharacterized protein LOC102224454 [Xiphophorus maculatus]
Cluster-54524.111367	XP_004213156.1	PREDICTED: uncharacterized protein LOC101240282, partial [Hydra vulgaris]
Cluster-54524.111363	XP_006557672.1	PREDICTED: CUGBP Elav-like family member 4-like isoform X14 [Apis mellifera]
Cluster-54524.111361	--	--
Cluster-54524.36489	--	--
Cluster-54524.112314	XP_012944685.1	PREDICTED: maestro heat-like repeat-containing protein family member 1 isoform X3 [Aplysia californica]
Cluster-54524.85406	--	--
Cluster-54524.114463	XP_972549.2	PREDICTED: mitochondrial ribonuclease P protein 1 homolog [Tribolium castaneum]>gi|270013991|gb|EFA10439.1| hypothetical protein TcasGA2_TC012682 [Tribolium castaneum]
Cluster-54524.114461	--	--
Cluster-54524.114460	--	--
Cluster-54524.114466	--	--
Cluster-54524.33509	--	--
Cluster-54524.33508	--	--
Cluster-54524.33503	AGS83388.1	ADAM17 protein [Eriocheir sinensis]
Cluster-54524.33507	--	--
Cluster-54524.33506	--	--
Cluster-54524.104239	--	--
Cluster-54524.104234	XP_004069429.1	PREDICTED: dnaJ homolog subfamily C member 24 [Oryzias latipes]
Cluster-54524.73300	KDR20793.1	SERTA domain-containing protein 2 [Zootermopsis nevadensis]
Cluster-54524.88762	Q9NL83.1	RecName: Full=Orcokinin peptides type A; Contains: RecName: Full=Orcomyotropin-like peptide; Contains: RecName: Full=Orcokinin; Contains: RecName: Full=Orcokinin-like peptide 1; Contains: RecName: Full=Orcokinin-like peptide 2; Contains: RecName: Full=Orcokinin-like peptide 3; Contains: RecName: Full=Orcokinin-like peptide 4; Flags: Precursor [Procambarus clarkii]>gi|7619887|dbj|BAA94753.1| orcok…
Cluster-54524.73304	--	--
Cluster-54524.88768	XP_012777046.1	PREDICTED: tubulin alpha-1A chain-like [Maylandia zebra]
Cluster-54524.86032	--	--
Cluster-54524.68668	--	--
Cluster-54524.68669	XP_003724215.1	PREDICTED: RING finger protein nhl-1-like [Strongylocentrotus purpuratus]
Cluster-54524.133385	--	--
Cluster-54524.68666	--	--
Cluster-54524.133384	--	--
Cluster-54524.88760	AEP17493.1	copper/zinc superoxide dismutase [Eriocheir sinensis]
Cluster-54524.115334	EFX70652.1	hypothetical protein DAPPUDRAFT_309374 [Daphnia pulex]
Cluster-54524.115336	XP_006193957.1	PREDICTED: translation factor GUF1, mitochondrial [Camelus ferus]
Cluster-54524.115337	--	--
Cluster-54524.115339	AHI47024.1	doublesex and mab-3 related transcription factor 11E [Macrobrachium rosenbergii]
Cluster-54524.63274	--	--
Cluster-54524.84208	--	--
Cluster-54524.77974	--	--
Cluster-54524.77975	--	--
Cluster-54524.77970	XP_012169624.1	PREDICTED: atypical protein kinase C isoform X3 [Bombus terrestris]
Cluster-54524.77972	--	--
Cluster-54524.69537	--	--
Cluster-54524.69536	KDR22855.1	Core histone macro-H2A.1 [Zootermopsis nevadensis]
Cluster-54524.69534	--	--
Cluster-54524.86293	--	--
Cluster-54524.109826	--	--
Cluster-54524.140854	XP_011439356.1	PREDICTED: regucalcin-like [Crassostrea gigas]>gi|762113211|ref|XP_011439357.1| PREDICTED: regucalcin-like [Crassostrea gigas]>gi|405966469|gb|EKC31748.1| Regucalcin [Crassostrea gigas]
Cluster-54524.127574	EFX85557.1	hypothetical protein DAPPUDRAFT_187637 [Daphnia pulex]
Cluster-54524.63273	--	--
Cluster-54524.5077	--	--
Cluster-54524.5076	--	--
Cluster-54524.93792	XP_011345056.1	PREDICTED: myosin heavy chain, muscle isoform X19 [Cerapachys biroi]
Cluster-54524.11643	--	--
Cluster-54524.93796	AEB54627.1	trap [Procambarus clarkii]
Cluster-54524.93794	AET34922.1	interferon-related developmental regulator 1 [Macrobrachium rosenbergii]
Cluster-54524.93799	XP_012350802.1	PREDICTED: solute carrier family 2, facilitated glucose transporter member 1-like isoform X8 [Apis florea]
Cluster-54524.80606	XP_011636189.1	PREDICTED: probable G-protein coupled receptor Mth-like 3 [Pogonomyrmex barbatus]
Cluster-54524.16146	--	--
Cluster-54524.109828	--	--
Cluster-54524.65953	--	--
Cluster-54524.65954	XP_011430767.1	PREDICTED: uncharacterized protein LOC105330625 isoform X6 [Crassostrea gigas]
Cluster-54524.65956	KDR24395.1	Serine protease nudel [Zootermopsis nevadensis]
Cluster-54524.119909	--	--
Cluster-54524.119901	--	--
Cluster-54524.119900	XP_011612661.1	PREDICTED: sodium- and chloride-dependent neutral and basic amino acid transporter B(0+) [Takifugu rubripes]
Cluster-54524.84885	--	--
Cluster-54524.10597	NP_002787.2	proteasome subunit beta type-4 [Homo sapiens]>gi|397492784|ref|XP_003817300.1| PREDICTED: proteasome subunit beta type-4 [Pan paniscus]>gi|426331438|ref|XP_004026688.1| PREDICTED: proteasome subunit beta type-4 isoform 1 [Gorilla gorilla gorilla]>gi|426331440|ref|XP_004026689.1| PREDICTED: proteasome subunit beta type-4 isoform 2 [Gorilla gorilla gorilla]>gi|426331442|ref|XP_004026690.1| PREDICTE…
Cluster-54524.85793	--	--
Cluster-54524.139348	XP_012140360.1	PREDICTED: phosphatidylinositol 4-phosphate 3-kinase C2 domain-containing subunit beta isoform X3 [Megachile rotundata]
Cluster-54524.85794	--	--
Cluster-54524.127194	--	--
Cluster-54524.127197	AFV39705.1	Bmal1a [Pacifastacus leniusculus]
Cluster-54524.66639	KFM61566.1	hypothetical protein X975_01658, partial [Stegodyphus mimosarum]
Cluster-54524.66633	XP_002433360.1	nhl repeat-containing protein, putative [Ixodes scapularis]>gi|215490783|gb|EEC00424.1| nhl repeat-containing protein, putative [Ixodes scapularis]
Cluster-54524.66632	--	--
Cluster-54524.66636	XP_003486181.1	PREDICTED: beta-1,4-N-acetylgalactosaminyltransferase bre-4 [Bombus impatiens]>gi|815899138|ref|XP_012250198.1| PREDICTED: beta-1,4-N-acetylgalactosaminyltransferase bre-4 [Bombus impatiens]>gi|815899140|ref|XP_012250200.1| PREDICTED: beta-1,4-N-acetylgalactosaminyltransferase bre-4 [Bombus impatiens]
Cluster-54524.135514	XP_008500664.1	PREDICTED: DNA repair and recombination protein RAD54B [Calypte anna]
Cluster-54524.19266	CAX73947.1	U3 small nucleolar RNA-associated protein 14 [Schistosoma japonicum]
Cluster-54524.121920	--	--
Cluster-54524.121921	--	--
Cluster-54524.60257	--	--
Cluster-54524.121929	--	--
Cluster-54524.18139	XP_005806710.1	PREDICTED: transcription initiation factor TFIID subunit 1-like [Xiphophorus maculatus]
Cluster-54524.18138	--	--
Cluster-54524.18133	--	--
Cluster-54524.18132	CBY21766.1	unnamed protein product [Oikopleura dioica]
Cluster-54524.18137	XP_011333814.1	PREDICTED: T-complex protein 1 subunit alpha [Cerapachys biroi]>gi|607363263|gb|EZA57501.1| T-complex protein 1 subunit alpha [Cerapachys biroi]
Cluster-54524.18136	XP_012618495.1	PREDICTED: dnaJ homolog subfamily C member 16 isoform X1 [Microcebus murinus]>gi|829758235|ref|XP_012618496.1| PREDICTED: dnaJ homolog subfamily C member 16 isoform X1 [Microcebus murinus]
Cluster-54524.67943	--	--
Cluster-54524.67945	--	--
Cluster-54524.67946	--	--
Cluster-54524.92678	XP_001862150.1	neuroligin [Culex quinquefasciatus]>gi|167873175|gb|EDS36558.1| neuroligin [Culex quinquefasciatus]
Cluster-54524.92676	--	--
Cluster-54524.92677	--	--
Cluster-54524.92675	KDR13674.1	hypothetical protein L798_12320, partial [Zootermopsis nevadensis]
Cluster-54524.92673	--	--
Cluster-54524.92670	--	--
Cluster-54524.79684	--	--
Cluster-54524.79686	--	--
Cluster-54524.79687	--	--
Cluster-54524.79688	--	--
Cluster-54524.79689	--	--
Cluster-54524.4166	XP_002416126.1	sidestep protein, putative [Ixodes scapularis]>gi|215510340|gb|EEC19793.1| sidestep protein, putative, partial [Ixodes scapularis]
Cluster-54524.112848	--	--
Cluster-54524.112843	KDR15276.1	Sorbin and SH3 domain-containing protein 1, partial [Zootermopsis nevadensis]
Cluster-54524.112842	--	--
Cluster-54524.112841	KDR15276.1	Sorbin and SH3 domain-containing protein 1, partial [Zootermopsis nevadensis]
Cluster-54524.112840	--	--
Cluster-54524.112847	KDR15276.1	Sorbin and SH3 domain-containing protein 1, partial [Zootermopsis nevadensis]
Cluster-54524.112846	--	--
Cluster-54524.4168	--	--
Cluster-54524.112844	--	--
Cluster-54524.122472	--	--
Cluster-54524.94850	KDR14794.1	Fibronectin type-III domain-containing protein 3a [Zootermopsis nevadensis]
Cluster-54524.94851	KFM73069.1	Potassium channel subfamily K member 18, partial [Stegodyphus mimosarum]
Cluster-54524.94852	--	--
Cluster-54524.94853	XP_006610697.1	PREDICTED: protein kinase C and casein kinase substrate in neurons protein 2-like isoform X6 [Apis dorsata]
Cluster-54524.94856	KDR18162.1	Dual 3',5'-cyclic-AMP and -GMP phosphodiesterase 11 [Zootermopsis nevadensis]
Cluster-54524.94858	KDR10309.1	hypothetical protein L798_14992 [Zootermopsis nevadensis]
Cluster-54524.84400	--	--
Cluster-54524.58839	--	--
Cluster-54524.58836	ADK38673.2	Wnt5 [Platynereis dumerilii]
Cluster-54524.58834	--	--
Cluster-54524.58831	XP_001650006.1	AAEL004910-PA [Aedes aegypti]>gi|108879445|gb|EAT43670.1| AAEL004910-PA [Aedes aegypti]
Cluster-54524.3676	--	--
Cluster-54524.3674	--	--
Cluster-54524.63694	--	--
Cluster-54524.125123	--	--
Cluster-54524.125121	--	--
Cluster-54524.125124	--	--
Cluster-54524.91329	--	--
Cluster-54524.91325	EFX65169.1	putative TGF-beta receptor type I saxophone protein [Daphnia pulex]
Cluster-54524.91324	XP_011258159.1	PREDICTED: cytospin-A-like isoform X6 [Camponotus floridanus]
Cluster-41825.0	--	--
Cluster-54524.91323	KFM77320.1	Apoptosis-inducing factor 3, partial [Stegodyphus mimosarum]
Cluster-54524.2784	XP_002009257.1	GI11350 [Drosophila mojavensis]>gi|193920866|gb|EDW19733.1| GI11350 [Drosophila mojavensis]
Cluster-54524.29757	--	--
Cluster-54524.97104	--	--
Cluster-54524.126626	--	--
Cluster-54524.97102	--	--
Cluster-54524.97101	--	--
Cluster-54524.97100	XP_012402775.1	PREDICTED: protein NRDE2 homolog isoform X1 [Sarcophilus harrisii]
Cluster-54524.100350	KDR08784.1	hypothetical protein L798_00963, partial [Zootermopsis nevadensis]
Cluster-54524.124037	--	--
Cluster-54524.100352	--	--
Cluster-54524.100353	XP_012938998.1	PREDICTED: PX domain-containing protein kinase-like protein [Aplysia californica]
Cluster-54524.100354	ABS57456.1	alpha-tubulin [Heliconius melpomene]
Cluster-54524.100355	XP_008473520.1	PREDICTED: pumilio homolog 1-like [Diaphorina citri]
Cluster-54524.100356	--	--
Cluster-54524.100357	AET36897.1	troponin C2 [Litopenaeus vannamei]
Cluster-54524.100358	--	--
Cluster-54524.100359	--	--
Cluster-54524.118500	EFX74841.1	hypothetical protein DAPPUDRAFT_306984 [Daphnia pulex]
Cluster-54524.118502	XP_002603715.1	hypothetical protein BRAFLDRAFT_93070 [Branchiostoma floridae]>gi|229289037|gb|EEN59726.1| hypothetical protein BRAFLDRAFT_93070 [Branchiostoma floridae]
Cluster-54524.118504	XP_010157099.1	PREDICTED: E3 ubiquitin-protein ligase TRIM32 [Eurypyga helias]
Cluster-54524.118507	XP_006996505.1	PREDICTED: zinc finger protein 709-like [Peromyscus maniculatus bairdii]
Cluster-54524.87345	--	--
Cluster-54524.106996	--	--
Cluster-54524.58469	XP_007658385.1	PREDICTED: PR domain zinc finger protein 14-like [Ornithorhynchus anatinus]
Cluster-54524.103070	--	--
Cluster-54524.103071	EFX70596.1	hypothetical protein DAPPUDRAFT_309386 [Daphnia pulex]
Cluster-54524.103072	EFX70596.1	hypothetical protein DAPPUDRAFT_309386 [Daphnia pulex]
Cluster-54524.103073	EFX70596.1	hypothetical protein DAPPUDRAFT_309386 [Daphnia pulex]
Cluster-54524.103074	EFX70596.1	hypothetical protein DAPPUDRAFT_309386 [Daphnia pulex]
Cluster-54524.103077	EFX70596.1	hypothetical protein DAPPUDRAFT_309386 [Daphnia pulex]
Cluster-54524.103078	KDR14171.1	Protein transport protein Sec24C [Zootermopsis nevadensis]
Cluster-54524.103079	KDR14171.1	Protein transport protein Sec24C [Zootermopsis nevadensis]
Cluster-54524.74795	--	--
Cluster-54524.31609	--	--
Cluster-54524.31604	--	--
Cluster-54524.5104	--	--
Cluster-54524.34387	--	--
Cluster-54524.34382	--	--
Cluster-54524.34380	--	--
Cluster-54524.71808	--	--
Cluster-54524.71807	--	--
Cluster-54524.71805	XP_007896712.1	PREDICTED: pseudouridine-metabolizing bifunctional protein C1861.05-like [Callorhinchus milii]
Cluster-54524.146284	KDR14705.1	Vascular endothelial growth factor receptor 2 [Zootermopsis nevadensis]
Cluster-54524.43996	--	--
Cluster-54524.70828	--	--
Cluster-54524.92800	--	--
Cluster-54524.59728	--	--
Cluster-54524.152429	--	--
Cluster-54524.136091	--	--
Cluster-54524.82262	--	--
Cluster-54524.82263	--	--
Cluster-54524.96589	--	--
Cluster-54524.140059	ADO65978.1	cathepsin L [Eriocheir sinensis]>gi|309380134|gb|ADO65980.1| cathepsin L [Eriocheir sinensis]
Cluster-54524.140057	--	--
Cluster-54524.140055	XP_005928139.1	PREDICTED: UDP-glucuronosyltransferase 2A1-like isoform X1 [Haplochromis burtoni]>gi|554835283|ref|XP_005928140.1| PREDICTED: UDP-glucuronosyltransferase 2A1-like isoform X2 [Haplochromis burtoni]>gi|554835285|ref|XP_005928141.1| PREDICTED: UDP-glucuronosyltransferase 2A1-like isoform X3 [Haplochromis burtoni]
Cluster-54524.131520	--	--
Cluster-54524.131525	KDR10839.1	hypothetical protein L798_14821 [Zootermopsis nevadensis]
Cluster-54524.107904	--	--
Cluster-54524.88688	BAO00971.1	allatostatin C [Nilaparvata lugens]
Cluster-54524.88689	XP_001946597.2	PREDICTED: prominin-like protein isoform X2 [Acyrthosiphon pisum]
Cluster-54524.88685	--	--
Cluster-54524.88687	--	--
Cluster-54524.88682	--	--
Cluster-54524.144465	--	--
Cluster-54524.78142	P80007.1	RecName: Full=Crustacyanin-A2 subunit [Homarus gammarus]>gi|23200069|pdb|1GKA|B Chain B, The Molecular Basis Of The Coloration Mechanism In Lobster Shell. Beta-Crustacyanin At 3.2 A Resolution
Cluster-54524.78145	--	--
Cluster-54524.149735	--	--
Cluster-54524.64925	--	--
Cluster-54524.64921	--	--
Cluster-54524.149739	XP_004342894.1	hypothetical protein CAOG_07821 [Capsaspora owczarzaki ATCC 30864]>gi|765557440|gb|KJE97716.1| hypothetical protein CAOG_007821 [Capsaspora owczarzaki ATCC 30864]
Cluster-54524.64928	--	--
Cluster-54524.76384	--	--
Cluster-54524.76968	--	--
Cluster-54524.57418	--	--
Cluster-54524.93614	--	--
Cluster-54524.93613	--	--
Cluster-54524.93612	--	--
Cluster-54524.93611	XP_002432341.1	disco-interacting protein, putative [Pediculus humanus corporis]>gi|212517764|gb|EEB19603.1| disco-interacting protein, putative [Pediculus humanus corporis]
Cluster-54524.57416	--	--
Cluster-54524.117093	--	--
Cluster-54524.117092	--	--
Cluster-54524.117095	XP_003505177.2	PREDICTED: acyl-coenzyme A thioesterase 1-like isoform X1 [Cricetulus griseus]>gi|344245530|gb|EGW01634.1| Acyl-coenzyme A thioesterase 1 [Cricetulus griseus]
Cluster-54524.117098	--	--
Cluster-54524.124540	--	--
Cluster-54524.124546	KDR12454.1	Protein-cysteine N-palmitoyltransferase Rasp [Zootermopsis nevadensis]
Cluster-54524.124544	--	--
Cluster-54524.134313	--	--
Cluster-54524.134310	XP_006569588.1	PREDICTED: fat-like cadherin-related tumor suppressor homolog isoform X10 [Apis mellifera]
Cluster-54524.134316	--	--
Cluster-54524.134315	--	--
Cluster-54524.127016	--	--
Cluster-54524.37826	--	--
Cluster-54524.127011	XP_011439290.1	PREDICTED: cell division cycle 7-related protein kinase-like [Crassostrea gigas]
Cluster-54524.127012	EFX74357.1	sodium-dependent phosphate transporter [Daphnia pulex]
Cluster-54524.101278	--	--
Cluster-54524.45528	XP_009309792.1	40S ribosomal protein S6 [Trypanosoma grayi]>gi|657141954|gb|KEG11975.1| 40S ribosomal protein S6 [Trypanosoma grayi]
Cluster-54524.45522	--	--
Cluster-54524.45523	--	--
Cluster-54524.45524	--	--
Cluster-54524.96739	--	--
Cluster-54524.96738	KFM75959.1	Spectrin beta chain, brain 4, partial [Stegodyphus mimosarum]
Cluster-54524.96737	KDR11298.1	Disintegrin and metalloproteinase domain-containing protein 22, partial [Zootermopsis nevadensis]
Cluster-54524.96733	XP_011051807.1	PREDICTED: uncharacterized protein LOC105144539 isoform X2 [Acromyrmex echinatior]
Cluster-54524.96731	XP_012238901.1	PREDICTED: protein kinase C-binding protein NELL1-like isoform X1 [Bombus impatiens]
Cluster-54524.96730	--	--
Cluster-54524.101276	KDR15008.1	DNA replication licensing factor MCM3 [Zootermopsis nevadensis]
Cluster-54524.19181	CEM02391.1	unnamed protein product [Vitrella brassicaformis CCMP3155]
Cluster-54524.19188	XP_001388133.1	cyclin dependent kinase A [Cryptosporidium parvum Iowa II]>gi|126117210|gb|EAZ51310.1| cyclin dependent kinase A, putative [Cryptosporidium parvum Iowa II]
Cluster-54524.135048	XP_002596802.1	hypothetical protein BRAFLDRAFT_262914 [Branchiostoma floridae]>gi|229282062|gb|EEN52814.1| hypothetical protein BRAFLDRAFT_262914 [Branchiostoma floridae]
Cluster-54524.138094	--	--
Cluster-54524.133326	--	--
Cluster-54524.138097	XP_009057711.1	hypothetical protein LOTGIDRAFT_233423 [Lottia gigantea]>gi|556102996|gb|ESO91648.1| hypothetical protein LOTGIDRAFT_233423 [Lottia gigantea]
Cluster-54524.84066	--	--
Cluster-54524.123663	--	--
Cluster-54524.123661	--	--
Cluster-54524.4083	--	--
Cluster-54524.135471	--	--
Cluster-54524.78987	--	--
Cluster-54524.55835	--	--
Cluster-54524.55837	XP_011496811.1	PREDICTED: LOW QUALITY PROTEIN: nucleosome-remodeling factor subunit NURF301 [Ceratosolen solmsi marchali]
Cluster-54524.55831	--	--
Cluster-54524.122530	XP_002422882.1	C-terminal pdz ligand of neuronal nitric oxide synthase protein, putative [Pediculus humanus corporis]>gi|212505764|gb|EEB10144.1| C-terminal pdz ligand of neuronal nitric oxide synthase protein, putative [Pediculus humanus corporis]
Cluster-54524.92739	ACY66482.1	NADH:ubiquinone dehydrogenase [Scylla paramamosain]
Cluster-54524.92732	AIF73508.1	UV2 opsin, partial [Neogonodactylus oerstedii]
Cluster-54524.92737	--	--
Cluster-54524.92735	KDR19579.1	Rho GTPase-activating protein 19 [Zootermopsis nevadensis]
Cluster-54524.92734	ADF87944.1	interleukin enhancer binding factor [Eriocheir sinensis]
Cluster-54524.58973	--	--
Cluster-54524.58976	--	--
Cluster-54524.125089	KDR15617.1	Calcium-dependent secretion activator [Zootermopsis nevadensis]
Cluster-54524.125088	KDR15617.1	Calcium-dependent secretion activator [Zootermopsis nevadensis]
Cluster-54524.125087	XP_008193449.1	PREDICTED: calcium-dependent secretion activator isoform X4 [Tribolium castaneum]>gi|270014966|gb|EFA11414.1| hypothetical protein TcasGA2_TC013590 [Tribolium castaneum]
Cluster-54524.125081	--	--
Cluster-54524.102238	XP_006006814.1	PREDICTED: conserved oligomeric Golgi complex subunit 8 [Latimeria chalumnae]
Cluster-54524.102231	--	--
Cluster-54524.102230	--	--
Cluster-54524.102233	EFX70975.1	hypothetical protein DAPPUDRAFT_31637, partial [Daphnia pulex]
Cluster-54524.102234	XP_002414825.1	RAB GDP/GTP exchange factor, putative [Ixodes scapularis]>gi|215509037|gb|EEC18490.1| RAB GDP/GTP exchange factor, putative [Ixodes scapularis]
Cluster-54524.102237	ADK25179.1	SID-1-like protein [Litopenaeus vannamei]
Cluster-54524.109046	--	--
Cluster-78792.2	--	--
Cluster-54524.109514	EFX86656.1	hypothetical protein DAPPUDRAFT_222043 [Daphnia pulex]
Cluster-54524.109517	XP_009066246.1	hypothetical protein LOTGIDRAFT_134134 [Lottia gigantea]>gi|556094411|gb|ESO83064.1| hypothetical protein LOTGIDRAFT_134134 [Lottia gigantea]
Cluster-54524.101762	KDR23640.1	Krueppel-like factor 2 [Zootermopsis nevadensis]
Cluster-54524.101763	XP_002074240.1	GK18392 [Drosophila willistoni]>gi|194170325|gb|EDW85226.1| GK18392 [Drosophila willistoni]
Cluster-54524.101761	XP_012265786.1	PREDICTED: ATP-binding cassette sub-family C member Sur [Athalia rosae]
Cluster-54524.101764	KDR16947.1	Epidermal growth factor receptor [Zootermopsis nevadensis]
Cluster-54524.101765	KFM80792.1	ATP-binding cassette sub-family C member 9, partial [Stegodyphus mimosarum]
Cluster-54524.130667	--	--
Cluster-54524.91288	AKB96224.1	heat shock protein [Cherax destructor]
Cluster-54524.91289	KDR08860.1	Tumor protein D54 [Zootermopsis nevadensis]
Cluster-54524.91283	--	--
Cluster-54524.91280	--	--
Cluster-54524.91281	AFA36654.1	elongation factor 1-delta protein [Eriocheir sinensis]
Cluster-54524.91286	KDR16152.1	hypothetical protein L798_09565, partial [Zootermopsis nevadensis]
Cluster-54524.91285	KDR08943.1	hypothetical protein L798_00871 [Zootermopsis nevadensis]
Cluster-54524.130663	--	--
Cluster-54524.130660	KDR07911.1	C-myc promoter-binding protein [Zootermopsis nevadensis]
Cluster-54524.83648	--	--
Cluster-54524.83641	--	--
Cluster-54524.83645	XP_006610336.1	PREDICTED: carbohydrate sulfotransferase 4-like isoform X2 [Apis dorsata]
Cluster-54524.83644	XP_006610336.1	PREDICTED: carbohydrate sulfotransferase 4-like isoform X2 [Apis dorsata]
Cluster-54524.83646	--	--
Cluster-54524.75169	EFA11400.1	hypothetical protein TcasGA2_TC013573 [Tribolium castaneum]
Cluster-54524.75168	XP_011500594.1	PREDICTED: proto-oncogene tyrosine-protein kinase receptor Ret [Ceratosolen solmsi marchali]
Cluster-54524.75167	--	--
Cluster-54524.75166	XP_011500594.1	PREDICTED: proto-oncogene tyrosine-protein kinase receptor Ret [Ceratosolen solmsi marchali]
Cluster-54524.75161	KDR09954.1	Dual specificity protein phosphatase 12 [Zootermopsis nevadensis]
Cluster-54524.75163	--	--
Cluster-54524.100499	XP_002430992.1	E3 ubiquitin ligase triad3, putative [Pediculus humanus corporis]>gi|212516216|gb|EEB18254.1| E3 ubiquitin ligase triad3, putative [Pediculus humanus corporis]
Cluster-54524.100498	--	--
Cluster-54524.100492	--	--
Cluster-54524.100496	XP_009289701.1	PREDICTED: E3 ubiquitin-protein ligase RNF168 isoform X1 [Danio rerio]
Cluster-54524.100495	--	--
Cluster-54524.100494	--	--
Cluster-54524.74699	--	--
Cluster-54524.74696	--	--
Cluster-54524.74690	CDI40103.1	WNT7 protein [Euperipatoides kanangrensis]
Cluster-54524.106260	--	--
Cluster-54524.106268	NP_001080066.1	thioredoxin 2 [Xenopus laevis]>gi|27694724|gb|AAH43794.1| Txn2-prov protein [Xenopus laevis]
Cluster-54524.53060	--	--
Cluster-54524.53062	--	--
Cluster-54524.83133	--	--
Cluster-54524.105519	KDR10170.1	Ubiquitin carboxyl-terminal hydrolase 47 [Zootermopsis nevadensis]
Cluster-54524.14736	--	--
Cluster-54524.141175	--	--
Cluster-54524.105511	XP_012254258.1	PREDICTED: protein HGH1 homolog [Athalia rosae]
Cluster-54524.34553	--	--
Cluster-54524.105512	XP_012254258.1	PREDICTED: protein HGH1 homolog [Athalia rosae]
Cluster-54524.105515	XP_002429096.1	protein C-ets-1-B, putative [Pediculus humanus corporis]>gi|212513960|gb|EEB16358.1| protein C-ets-1-B, putative [Pediculus humanus corporis]
Cluster-54524.105516	--	--
Cluster-54524.79112	--	--
Cluster-54524.79117	XP_008553511.1	PREDICTED: 39S ribosomal protein L3, mitochondrial [Microplitis demolitor]
Cluster-54524.79118	KDR10699.1	39S ribosomal protein L3, mitochondrial [Zootermopsis nevadensis]
Cluster-54524.79119	KDR10699.1	39S ribosomal protein L3, mitochondrial [Zootermopsis nevadensis]
Cluster-54524.40479	--	--
Cluster-54524.125547	XP_970749.1	PREDICTED: ubiquitin-protein ligase E3B [Tribolium castaneum]>gi|270013259|gb|EFA09707.1| hypothetical protein TcasGA2_TC011840 [Tribolium castaneum]
Cluster-54524.104648	--	--
Cluster-54524.104649	--	--
Cluster-54524.104642	KKF11497.1	Zinc finger protein 665 [Larimichthys crocea]
Cluster-54524.104641	KKF11497.1	Zinc finger protein 665 [Larimichthys crocea]
Cluster-54524.104647	XP_794992.3	PREDICTED: GRIP and coiled-coil domain-containing protein 2 [Strongylocentrotus purpuratus]
Cluster-54524.104644	KDR18196.1	Wiskott-Aldrich syndrome protein family member 3 [Zootermopsis nevadensis]
Cluster-54524.78449	XP_011132527.1	phospholipase D [Gregarina niphandrodes]>gi|608649907|gb|EZG45312.1| phospholipase D [Gregarina niphandrodes]
Cluster-54524.78448	EFA13130.1	POU class 6 homeobox 2 [Tribolium castaneum]
Cluster-54524.78445	XP_012689175.1	PREDICTED: putative nuclease HARBI1 [Clupea harengus]
Cluster-54524.88334	XP_008190307.1	PREDICTED: uncharacterized protein LOC662983 isoform X2 [Tribolium castaneum]
Cluster-54524.88335	--	--
Cluster-54524.88337	--	--
Cluster-54524.88331	XP_011204143.1	PREDICTED: mitochondrial-processing peptidase subunit beta [Bactrocera dorsalis]
Cluster-54524.88333	XP_008190309.1	PREDICTED: uncharacterized protein LOC662983 isoform X3 [Tribolium castaneum]
Cluster-54524.44923	--	--
Cluster-54524.44922	--	--
Cluster-54524.123353	--	--
Cluster-54524.113431	--	--
Cluster-54524.138568	EFA78920.1	D-lactate dehydrogenase [Polysphondylium pallidum PN500]
Cluster-54524.87710	ACO10775.1	DNA-directed RNA polymerases I, II, and III subunit RPABC3 [Caligus rogercresseyi]
Cluster-3455.0	XP_002675475.1	predicted protein [Naegleria gruberi]>gi|284089071|gb|EFC42731.1| predicted protein [Naegleria gruberi]
Cluster-54524.138566	--	--
Cluster-54524.70851	--	--
Cluster-54524.49260	--	--
Cluster-54524.58788	XP_012269153.1	PREDICTED: putative uncharacterized protein DDB_G0277255 isoform X3 [Athalia rosae]
Cluster-54524.58786	--	--
Cluster-54524.39394	--	--
Cluster-54524.54212	XP_005698067.1	PREDICTED: zinc finger protein 771, partial [Capra hircus]
Cluster-54524.150929	--	--
Cluster-54524.41715	--	--
Cluster-54524.108310	XP_780532.4	PREDICTED: crossover junction endonuclease MUS81 [Strongylocentrotus purpuratus]
Cluster-54524.85984	--	--
Cluster-54524.115960	KDR12089.1	Protein cappuccino [Zootermopsis nevadensis]
Cluster-54524.115963	XP_008282712.1	PREDICTED: SET domain-containing protein 9 [Stegastes partitus]
Cluster-54524.115966	XP_008197542.1	PREDICTED: 5-hydroxytryptamine receptor-like [Tribolium castaneum]
Cluster-54524.115968	XP_008186026.1	PREDICTED: uncharacterized protein LOC100164801 isoform X3 [Acyrthosiphon pisum]
Cluster-54524.110722	--	--
Cluster-54524.93152	--	--
Cluster-54524.45899	EDM05726.1	procollagen, type 1, alpha 1, isoform CRA_a [Rattus norvegicus]
Cluster-54524.22876	ABF50840.2	putative achaete-scute complex protein, partial [Panulirus argus]
Cluster-54524.96247	--	--
Cluster-54524.96244	--	--
Cluster-54524.96240	--	--
Cluster-54524.96249	--	--
Cluster-54524.96248	--	--
Cluster-54524.99609	--	--
Cluster-3276.0	--	--
Cluster-54524.58224	--	--
Cluster-54524.4539	XP_002433592.1	hypothetical protein IscW_ISCW018097 [Ixodes scapularis]>gi|215495351|gb|EEC04992.1| hypothetical protein IscW_ISCW018097 [Ixodes scapularis]
Cluster-54524.55338	--	--
Cluster-54524.112436	XP_002430645.1	conserved hypothetical protein [Pediculus humanus corporis]>gi|212515817|gb|EEB17907.1| conserved hypothetical protein [Pediculus humanus corporis]
Cluster-54524.112435	--	--
Cluster-54524.112432	AKB96222.1	heat shock protein [Cherax destructor]
Cluster-54524.88879	--	--
Cluster-54524.112430	XP_011338545.1	PREDICTED: dynactin subunit 1 isoform X3 [Cerapachys biroi]
Cluster-54524.62231	--	--
Cluster-54524.62230	--	--
Cluster-54524.62238	--	--
Cluster-54524.95615	--	--
Cluster-54524.113747	EFX76944.1	hypothetical protein DAPPUDRAFT_321809 [Daphnia pulex]
Cluster-54524.113745	EFX76944.1	hypothetical protein DAPPUDRAFT_321809 [Daphnia pulex]
Cluster-54524.113743	--	--
Cluster-54524.113742	--	--
Cluster-54524.113741	XP_008195778.1	PREDICTED: dnaJ homolog subfamily C member 13 [Tribolium castaneum]
Cluster-54524.113749	--	--
Cluster-54524.113748	EFX76944.1	hypothetical protein DAPPUDRAFT_321809 [Daphnia pulex]
Cluster-54524.102165	--	--
Cluster-54524.35521	--	--
Cluster-54524.35520	--	--
Cluster-54524.35522	--	--
Cluster-54524.35524	ADH43623.1	C-type lectin [Eriocheir sinensis]
Cluster-54524.35526	AGC31447.1	C-type lectin [Eriocheir sinensis]
Cluster-54524.35529	XP_004078712.1	PREDICTED: vitelline membrane outer layer protein 1-like [Oryzias latipes]
Cluster-54524.82057	--	--
Cluster-54524.46250	--	--
Cluster-54524.82055	--	--
Cluster-54524.29387	--	--
Cluster-54524.46256	--	--
Cluster-54524.121522	--	--
Cluster-54524.121520	KDR15458.1	SEC14-like protein 1 [Zootermopsis nevadensis]
Cluster-54524.121526	--	--
Cluster-54524.121527	--	--
Cluster-54524.121528	KFM58131.1	Protein AHNAK2, partial [Stegodyphus mimosarum]
Cluster-54524.117112	KDR08635.1	Leucine zipper putative tumor suppressor 2-like protein [Zootermopsis nevadensis]
Cluster-54524.117113	KDR08635.1	Leucine zipper putative tumor suppressor 2-like protein [Zootermopsis nevadensis]
Cluster-54524.117110	KDR15626.1	putative carboxypeptidase PM20D1 [Zootermopsis nevadensis]
Cluster-54524.117118	--	--
Cluster-54524.117119	--	--
Cluster-54524.97385	EFX68440.1	hypothetical protein DAPPUDRAFT_203278 [Daphnia pulex]
Cluster-54524.97384	KDR18780.1	Protein hu-li tai shao [Zootermopsis nevadensis]
Cluster-54524.97387	--	--
Cluster-54524.97386	EFX68440.1	hypothetical protein DAPPUDRAFT_203278 [Daphnia pulex]
Cluster-54524.97381	XP_002597516.1	hypothetical protein BRAFLDRAFT_122212 [Branchiostoma floridae]>gi|229282781|gb|EEN53528.1| hypothetical protein BRAFLDRAFT_122212 [Branchiostoma floridae]
Cluster-54524.97380	XP_002597516.1	hypothetical protein BRAFLDRAFT_122212 [Branchiostoma floridae]>gi|229282781|gb|EEN53528.1| hypothetical protein BRAFLDRAFT_122212 [Branchiostoma floridae]
Cluster-54524.97383	--	--
Cluster-54524.97389	--	--
Cluster-54524.97388	XP_001381858.2	PREDICTED: ferric-chelate reductase 1 [Monodelphis domestica]
Cluster-54524.112776	KMQ85271.1	junctophilin-1-like isoformx1 protein [Lasius niger]
Cluster-54524.95725	KDR11641.1	DnaJ-like protein subfamily C member 3 [Zootermopsis nevadensis]
Cluster-54524.95724	--	--
Cluster-54524.95727	EFX71849.1	hypothetical protein DAPPUDRAFT_308685 [Daphnia pulex]
Cluster-54524.95721	KDR07715.1	hypothetical protein L798_02631 [Zootermopsis nevadensis]
Cluster-54524.95720	XP_008191127.1	PREDICTED: caskin-1 isoform X1 [Tribolium castaneum]>gi|642917131|ref|XP_008191128.1| PREDICTED: caskin-1 isoform X1 [Tribolium castaneum]>gi|642917133|ref|XP_008191129.1| PREDICTED: caskin-1 isoform X1 [Tribolium castaneum]>gi|270003487|gb|EEZ99934.1| hypothetical protein TcasGA2_TC002730 [Tribolium castaneum]
Cluster-54524.95723	XP_008475306.1	PREDICTED: tyrosine-protein phosphatase non-receptor type 9-like isoform X1 [Diaphorina citri]>gi|662203901|ref|XP_008475307.1| PREDICTED: tyrosine-protein phosphatase non-receptor type 9-like isoform X2 [Diaphorina citri]
Cluster-54524.95729	XP_011169920.1	PREDICTED: FERM, RhoGEF and pleckstrin domain-containing protein 1-like [Solenopsis invicta]
Cluster-54524.95728	XP_001985889.1	GH21059 [Drosophila grimshawi]>gi|193901889|gb|EDW00756.1| GH21059 [Drosophila grimshawi]
Cluster-54524.134297	--	--
Cluster-54524.134291	XP_007893096.1	PREDICTED: platelet-activating factor acetylhydrolase 2, cytoplasmic [Callorhinchus milii]
Cluster-54524.134299	--	--
Cluster-54524.39674	--	--
Cluster-54524.110467	XP_012939205.1	PREDICTED: frizzled-9-like [Aplysia californica]
Cluster-54524.110466	XP_011254792.1	PREDICTED: E3 ubiquitin-protein ligase RNF13-like [Camponotus floridanus]>gi|307190473|gb|EFN74498.1| RING finger protein 13 [Camponotus floridanus]
Cluster-54524.110465	XP_008197008.1	PREDICTED: uncharacterized protein LOC103314036 isoform X2 [Tribolium castaneum]
Cluster-54524.110462	EFX83180.1	hypothetical protein DAPPUDRAFT_302058 [Daphnia pulex]
Cluster-54524.110460	EFX83180.1	hypothetical protein DAPPUDRAFT_302058 [Daphnia pulex]
Cluster-54524.110469	XP_011351932.1	PREDICTED: DDB1- and CUL4-associated factor 12 [Cerapachys biroi]>gi|607366699|gb|EZA60856.1| DDB1- and CUL4-associated factor [Cerapachys biroi]
Cluster-54524.62177	--	--
Cluster-54524.123587	--	--
Cluster-54524.123581	--	--
Cluster-54524.98830	EHJ76831.1	hypothetical protein KGM_17362 [Danaus plexippus]
Cluster-54524.98836	KDR09704.1	ATP synthase mitochondrial F1 complex assembly factor 1 [Zootermopsis nevadensis]
Cluster-54524.98835	KDR19135.1	C-jun-amino-terminal kinase-interacting protein 3 [Zootermopsis nevadensis]
Cluster-54524.98838	KDR19624.1	Rho GTPase-activating protein 20 [Zootermopsis nevadensis]
Cluster-76397.0	KFB39338.1	glutathione s-transferase E2 [Anopheles sinensis]
Cluster-54524.102375	--	--
Cluster-54524.102370	--	--
Cluster-54524.102371	--	--
Cluster-54524.107479	ELU12253.1	hypothetical protein CAPTEDRAFT_199795 [Capitella teleta]
Cluster-54524.82415	--	--
Cluster-54524.82410	--	--
Cluster-54524.107470	XP_011493158.1	AAEL009387-PB [Aedes aegypti]>gi|403183034|gb|EJY57803.1| AAEL009387-PB [Aedes aegypti]
Cluster-54524.107472	ERL93113.1	hypothetical protein D910_10415 [Dendroctonus ponderosae]
Cluster-54524.107473	--	--
Cluster-54524.107474	KFM67150.1	hypothetical protein X975_02699, partial [Stegodyphus mimosarum]
Cluster-54524.107475	--	--
Cluster-54524.82419	XP_011662166.1	PREDICTED: uncharacterized protein LOC105437364 [Strongylocentrotus purpuratus]
Cluster-54524.5807	--	--
Cluster-71769.0	EYC45980.1	hypothetical protein Y032_0412g982 [Ancylostoma ceylanicum]
Cluster-54524.78911	AGI98173.1	beta-thymosin 5 [Pacifastacus leniusculus]
Cluster-54524.139147	XP_011442164.1	PREDICTED: uncharacterized protein LOC105338652 [Crassostrea gigas]>gi|762157397|ref|XP_011416852.1| PREDICTED: uncharacterized protein LOC105320568 [Crassostrea gigas]>gi|762157399|ref|XP_011416853.1| PREDICTED: uncharacterized protein LOC105320570 [Crassostrea gigas]
Cluster-54524.85193	--	--
Cluster-54524.85191	KFM74463.1	NGFI-A-binding protein-like protein, partial [Stegodyphus mimosarum]
Cluster-54524.85190	--	--
Cluster-54524.85197	--	--
Cluster-54524.16916	--	--
Cluster-54524.69475	--	--
Cluster-54524.109492	XP_012256101.1	PREDICTED: Kv channel-interacting protein 1 [Athalia rosae]
Cluster-54524.109493	XP_011879350.1	PREDICTED: RNA-binding protein 5-like [Vollenhovia emeryi]
Cluster-54524.109494	XP_012256101.1	PREDICTED: Kv channel-interacting protein 1 [Athalia rosae]
Cluster-54524.109495	XP_001603691.2	PREDICTED: Kv channel-interacting protein 1 [Nasonia vitripennis]>gi|644993964|ref|XP_008213781.1| PREDICTED: Kv channel-interacting protein 1 [Nasonia vitripennis]>gi|644993969|ref|XP_008213788.1| PREDICTED: Kv channel-interacting protein 1 [Nasonia vitripennis]
Cluster-54524.109496	XP_001603691.2	PREDICTED: Kv channel-interacting protein 1 [Nasonia vitripennis]>gi|644993964|ref|XP_008213781.1| PREDICTED: Kv channel-interacting protein 1 [Nasonia vitripennis]>gi|644993969|ref|XP_008213788.1| PREDICTED: Kv channel-interacting protein 1 [Nasonia vitripennis]
Cluster-54524.69471	--	--
Cluster-54524.85760	--	--
Cluster-54524.117846	KDR12702.1	Carbohydrate sulfotransferase 11 [Zootermopsis nevadensis]
Cluster-54524.147310	--	--
Cluster-54524.147318	--	--
Cluster-54524.81997	AEL23046.1	neuronal membrane glycoprotein M6-b [Cherax quadricarinatus]
Cluster-54524.81996	AEL23046.1	neuronal membrane glycoprotein M6-b [Cherax quadricarinatus]
Cluster-54524.81995	--	--
Cluster-54524.81992	KDR07206.1	Cuticlin-1, partial [Zootermopsis nevadensis]
Cluster-54524.81991	EMP38950.1	hypothetical protein UY3_03783, partial [Chelonia mydas]
Cluster-54524.85764	--	--
Cluster-54524.81999	--	--
Cluster-54524.81998	AEL23046.1	neuronal membrane glycoprotein M6-b [Cherax quadricarinatus]
Cluster-54524.72965	EFX88255.1	hypothetical protein DAPPUDRAFT_305705 [Daphnia pulex]
Cluster-54524.72961	--	--
Cluster-54524.72962	--	--
Cluster-54524.72963	--	--
Cluster-54524.72968	XP_001621791.1	hypothetical protein NEMVEDRAFT_v1g2616 [Nematostella vectensis]>gi|156208054|gb|EDO29691.1| predicted protein, partial [Nematostella vectensis]
Cluster-54524.72969	--	--
Cluster-54524.81512	XP_002400097.1	protein serine/threonine phosphatase 2C, putative [Ixodes scapularis]>gi|215510681|gb|EEC20134.1| protein serine/threonine phosphatase 2C, putative [Ixodes scapularis]
Cluster-54524.81514	--	--
Cluster-54524.35001	--	--
Cluster-51644.0	KMQ86569.1	transposase, partial [Lasius niger]
Cluster-54524.110313	--	--
Cluster-54524.35007	--	--
Cluster-54524.110312	XP_975426.1	PREDICTED: retinol dehydrogenase 12-like [Tribolium castaneum]
Cluster-54524.35005	EFX79367.1	hypothetical protein DAPPUDRAFT_319686 [Daphnia pulex]
Cluster-54524.80339	--	--
Cluster-54524.35008	--	--
Cluster-54524.35009	--	--
Cluster-54524.30331	KDR09509.1	N-acetyltransferase 15 [Zootermopsis nevadensis]
Cluster-54524.30337	--	--
Cluster-54524.112188	--	--
Cluster-54524.112189	XP_005188877.1	PREDICTED: spermine synthase isoform X1 [Musca domestica]
Cluster-54524.112184	EFX77788.1	hypothetical protein DAPPUDRAFT_305315 [Daphnia pulex]
Cluster-54524.112183	EFX77788.1	hypothetical protein DAPPUDRAFT_305315 [Daphnia pulex]
Cluster-54524.62781	--	--
Cluster-54524.62780	XP_011874268.1	PREDICTED: uncharacterized protein LOC105565573 [Vollenhovia emeryi]
Cluster-54524.62785	--	--
Cluster-54524.62787	XP_011449634.1	PREDICTED: uncharacterized protein LOC105343837 [Crassostrea gigas]
Cluster-54524.62786	--	--
Cluster-54524.71600	XP_011140140.1	PREDICTED: homeobox protein onecut [Harpegnathos saltator]
Cluster-54524.71601	XP_011140140.1	PREDICTED: homeobox protein onecut [Harpegnathos saltator]
Cluster-54524.71602	XP_011140140.1	PREDICTED: homeobox protein onecut [Harpegnathos saltator]
Cluster-54524.71603	XP_001603364.3	PREDICTED: homeobox protein onecut isoform X2 [Nasonia vitripennis]
Cluster-54524.48470	--	--
Cluster-54524.59330	ERL94491.1	hypothetical protein D910_11768 [Dendroctonus ponderosae]
Cluster-54524.58065	XP_003223943.2	PREDICTED: vitamin K epoxide reductase complex subunit 1 [Anolis carolinensis]
Cluster-54524.58060	--	--
Cluster-54524.58062	--	--
Cluster-54524.58068	--	--
Cluster-54524.104102	--	--
Cluster-54524.68988	XP_001959744.1	GF11886 [Drosophila ananassae]>gi|190621042|gb|EDV36566.1| GF11886 [Drosophila ananassae]
Cluster-54524.115483	--	--
Cluster-54524.114912	XP_001842025.1	conserved hypothetical protein [Culex quinquefasciatus]>gi|167874180|gb|EDS37563.1| conserved hypothetical protein [Culex quinquefasciatus]
Cluster-54524.70956	--	--
Cluster-54524.70954	--	--
Cluster-54524.9943	--	--
Cluster-54524.101858	--	--
Cluster-54524.101859	--	--
Cluster-54524.101853	XP_003436498.1	AGAP003509-PE [Anopheles gambiae str. PEST]>gi|347976442|ref|XP_003436499.1| AGAP003509-PG [Anopheles gambiae str. PEST]>gi|333466646|gb|EGK96324.1| AGAP003509-PE [Anopheles gambiae str. PEST]>gi|333466649|gb|EGK96327.1| AGAP003509-PG [Anopheles gambiae str. PEST]
Cluster-54524.101854	XP_003436498.1	AGAP003509-PE [Anopheles gambiae str. PEST]>gi|347976442|ref|XP_003436499.1| AGAP003509-PG [Anopheles gambiae str. PEST]>gi|333466646|gb|EGK96324.1| AGAP003509-PE [Anopheles gambiae str. PEST]>gi|333466649|gb|EGK96327.1| AGAP003509-PG [Anopheles gambiae str. PEST]
Cluster-54524.101855	AAK50057.2	Rh-like protein [Carcinus maenas]
Cluster-54524.101856	AAK50057.2	Rh-like protein [Carcinus maenas]
Cluster-54524.117466	--	--
Cluster-54524.117463	--	--
Cluster-54524.117460	--	--
Cluster-54524.97419	--	--
Cluster-54524.97418	--	--
Cluster-54524.37417	--	--
Cluster-54524.97413	BAM09219.1	long chain acly-CoA dehydrogenase, partial [Ursus thibetanus japonicus]
Cluster-54524.110117	XP_012254100.1	PREDICTED: protein GPR107 isoform X2 [Athalia rosae]
Cluster-54524.110115	--	--
Cluster-54524.110114	EFX76266.1	hypothetical protein DAPPUDRAFT_306210 [Daphnia pulex]
Cluster-54524.110112	EFX76266.1	hypothetical protein DAPPUDRAFT_306210 [Daphnia pulex]
Cluster-54524.110111	--	--
Cluster-54524.6418	--	--
Cluster-54524.142354	--	--
Cluster-54524.48944	--	--
Cluster-67503.0	XP_010328821.1	PREDICTED: catechol O-methyltransferase isoform X2 [Saimiri boliviensis boliviensis]>gi|725604169|ref|XP_010328822.1| PREDICTED: catechol O-methyltransferase isoform X2 [Saimiri boliviensis boliviensis]
Cluster-54524.142353	XP_002600175.1	hypothetical protein BRAFLDRAFT_204360 [Branchiostoma floridae]>gi|229285461|gb|EEN56187.1| hypothetical protein BRAFLDRAFT_204360, partial [Branchiostoma floridae]
Cluster-54524.63878	--	--
Cluster-54524.122969	--	--
Cluster-54524.32132	--	--
Cluster-54524.32131	--	--
Cluster-54524.122960	--	--
Cluster-54524.63873	--	--
Cluster-54524.63874	--	--
Cluster-54524.91137	--	--
Cluster-54524.30569	--	--
Cluster-54524.63876	--	--
Cluster-54524.91130	--	--
Cluster-54524.91131	--	--
Cluster-54524.27665	--	--
Cluster-54524.66902	XP_005111857.2	PREDICTED: tensin-1-like, partial [Aplysia californica]
Cluster-54524.66907	--	--
Cluster-54524.66906	--	--
Cluster-54524.66905	--	--
Cluster-54524.129874	--	--
Cluster-54524.60976	XP_012145723.1	PREDICTED: beta-1,4-glucuronyltransferase 1 isoform X5 [Megachile rotundata]>gi|805805224|ref|XP_012145724.1| PREDICTED: beta-1,4-glucuronyltransferase 1 isoform X5 [Megachile rotundata]
Cluster-79368.2	--	--
Cluster-54524.96793	--	--
Cluster-54524.61352	--	--
Cluster-54524.103453	XP_011439962.1	PREDICTED: MAM and LDL-receptor class A domain-containing protein 2-like [Crassostrea gigas]
Cluster-54524.103451	--	--
Cluster-67072.0	--	--
Cluster-54524.103457	--	--
Cluster-54524.103454	--	--
Cluster-54524.10891	--	--
Cluster-54524.86193	XP_011423701.1	PREDICTED: vacuolar protein sorting-associated protein 51 homolog [Crassostrea gigas]
Cluster-54524.86195	--	--
Cluster-54524.86198	--	--
Cluster-54524.86199	--	--
Cluster-54524.15116	EFA85155.1	hypothetical protein PPL_02155 [Polysphondylium pallidum PN500]
Cluster-54524.15117	AAP92609.1	Ab2-402 [Rattus norvegicus]
Cluster-54524.15114	--	--
Cluster-54524.87241	--	--
Cluster-54524.87243	--	--
Cluster-54524.87245	XP_008192624.1	PREDICTED: amyloid beta A4 precursor protein-binding family B member 2-like isoform X2 [Tribolium castaneum]
Cluster-54524.87249	--	--
Cluster-54524.82998	--	--
Cluster-54524.82995	--	--
Cluster-54524.82993	--	--
Cluster-54524.82991	XP_003708578.1	PREDICTED: epsilon-sarcoglycan isoform X2 [Megachile rotundata]
Cluster-54524.142965	--	--
Cluster-54524.109911	--	--
Cluster-54524.109914	XP_002734615.1	PREDICTED: 28 kDa heat- and acid-stable phosphoprotein-like [Saccoglossus kowalevskii]
Cluster-54524.109916	XP_010795709.1	PREDICTED: sprT-like domain-containing protein Spartan [Notothenia coriiceps]
Cluster-54524.18470	XP_004364588.1	DNA topoisomerase II [Capsaspora owczarzaki ATCC 30864]>gi|765549783|gb|KJE90404.1| DNA topoisomerase II [Capsaspora owczarzaki ATCC 30864]
Cluster-54524.18474	KJE97078.1	kinesin-1 [Capsaspora owczarzaki ATCC 30864]
Cluster-54524.18475	XP_651474.1	kinesin [Entamoeba histolytica HM-1:IMSS]>gi|56468214|gb|EAL46088.1| kinesin, putative [Entamoeba histolytica HM-1:IMSS]
Cluster-54524.80732	ACD13590.1	dynactin subunit 5 [Penaeus monodon]
Cluster-54524.80733	ABM55590.1	nucleoplasmin isoform 1-like protein [Maconellicoccus hirsutus]
Cluster-54524.121945	XP_001943183.2	PREDICTED: partitioning defective 3 homolog B isoform X3 [Acyrthosiphon pisum]
Cluster-54524.34949	--	--
Cluster-54524.130727	--	--
Cluster-54524.138136	XP_008480563.1	PREDICTED: RNA-directed DNA polymerase from mobile element jockey-like [Diaphorina citri]
Cluster-54524.130729	KDR15159.1	RNA (guanine-9-)-methyltransferase domain-containing protein 2 [Zootermopsis nevadensis]
Cluster-54524.84120	XP_006563524.1	PREDICTED: mothers against decapentaplegic homolog 4 isoform X8 [Apis mellifera]>gi|820856274|ref|XP_012345319.1| PREDICTED: mothers against decapentaplegic homolog 4 isoform X8 [Apis florea]
Cluster-54524.84125	--	--
Cluster-54524.84124	--	--
Cluster-54524.84126	--	--
Cluster-54524.84129	XP_003491251.1	PREDICTED: venom serine protease Bi-VSP [Bombus impatiens]
Cluster-54524.141435	XP_012614508.1	PREDICTED: cytochrome P450 3A4 isoform X1 [Microcebus murinus]
Cluster-54524.68084	XP_011069115.1	PREDICTED: potassium voltage-gated channel subfamily H member 2 isoform X13 [Acromyrmex echinatior]
Cluster-54524.125243	ACO11923.1	Mitotic spindle assembly checkpoint protein MAD2A [Lepeophtheirus salmonis]>gi|290561393|gb|ADD38097.1| Mitotic spindle assembly checkpoint protein MAD2A [Lepeophtheirus salmonis]
Cluster-54524.125242	KFM68243.1	Protein KRI1-like protein, partial [Stegodyphus mimosarum]
Cluster-54524.125246	--	--
Cluster-54524.85651	--	--
Cluster-54524.85656	--	--
Cluster-54524.85658	XP_012250650.1	PREDICTED: COPII coat assembly protein SEC16-like [Athalia rosae]
Cluster-54524.41059	--	--
Cluster-54524.139269	--	--
Cluster-54524.88449	--	--
Cluster-54524.131455	--	--
Cluster-54524.131451	--	--
Cluster-54524.152646	--	--
Cluster-54524.152649	--	--
Cluster-54524.110382	XP_009485998.1	PREDICTED: copine-8 [Pelecanus crispus]
Cluster-54524.73952	XP_002431392.1	glycine receptor alpha-2 chain precursor, putative [Pediculus humanus corporis]>gi|212516668|gb|EEB18654.1| glycine receptor alpha-2 chain precursor, putative [Pediculus humanus corporis]
Cluster-54524.73953	XP_002431392.1	glycine receptor alpha-2 chain precursor, putative [Pediculus humanus corporis]>gi|212516668|gb|EEB18654.1| glycine receptor alpha-2 chain precursor, putative [Pediculus humanus corporis]
Cluster-54524.73957	--	--
Cluster-54524.100653	EFX80619.1	hypothetical protein DAPPUDRAFT_50984 [Daphnia pulex]
Cluster-54524.100659	AFE19188.1	plasma membrane calcium ATPase [Callinectes sapidus]
Cluster-54524.36214	--	--
Cluster-54524.36211	--	--
Cluster-54524.46917	--	--
Cluster-54524.62910	--	--
Cluster-54524.93207	EGV91149.1	hypothetical protein I79_026257 [Cricetulus griseus]
Cluster-54524.104080	KMQ89210.1	protein phosphatase 1 regulatory subunit 12a, partial [Lasius niger]
Cluster-54524.120533	--	--
Cluster-54524.35685	--	--
Cluster-54524.111552	--	--
Cluster-54524.111555	XP_009043777.1	hypothetical protein LOTGIDRAFT_102561 [Lottia gigantea]>gi|556116580|gb|ESP05232.1| hypothetical protein LOTGIDRAFT_102561 [Lottia gigantea]
Cluster-54524.111556	KDR21277.1	Sarcolemmal membrane-associated protein [Zootermopsis nevadensis]
Cluster-54524.65846	--	--
Cluster-54524.111558	--	--
Cluster-54524.111559	--	--
Cluster-54524.35682	--	--
Cluster-54524.65843	--	--
Cluster-54524.35683	--	--
Cluster-54524.65841	--	--
Cluster-54524.84773	--	--
Cluster-54524.82382	--	--
Cluster-54524.82389	--	--
Cluster-54524.82388	--	--
Cluster-54524.59276	XP_012255227.1	PREDICTED: tRNA-specific adenosine deaminase 2 [Athalia rosae]
Cluster-54524.59279	--	--
Cluster-54524.59278	--	--
Cluster-54524.32449	--	--
Cluster-54524.103533	--	--
Cluster-54524.103532	--	--
Cluster-54524.103539	--	--
Cluster-54524.103538	--	--
Cluster-54524.31369	--	--
Cluster-54524.31366	--	--
Cluster-54524.11074	--	--
Cluster-54524.116676	EKC20665.1	Peroxisome biogenesis factor 1 [Crassostrea gigas]
Cluster-54524.116677	XP_001922025.3	PREDICTED: transmembrane and TPR repeat-containing protein 1 [Danio rerio]
Cluster-54524.119815	--	--
Cluster-54524.71245	--	--
Cluster-54524.156111	--	--
Cluster-54524.156110	--	--
Cluster-54524.156115	--	--
Cluster-54524.110092	--	--
Cluster-54524.110093	XP_011257282.1	PREDICTED: protein enhancer of sevenless 2B isoform X2 [Camponotus floridanus]
Cluster-54524.110096	XP_012266330.1	PREDICTED: protein purity of essence isoform X3 [Athalia rosae]
Cluster-54524.110097	--	--
Cluster-54524.110094	--	--
Cluster-54524.88464	--	--
Cluster-54524.110099	--	--
Cluster-54524.88469	KFM56688.1	Retrovirus-related Pol polyprotein from transposon 412, partial [Stegodyphus mimosarum]
Cluster-54524.65261	--	--
Cluster-54524.90674	XP_004928036.2	PREDICTED: cytosolic carboxypeptidase 2-like [Bombyx mori]
Cluster-54524.90676	AIS24843.1	T-complex protein 1 subunit alpha [Scylla paramamosain]
Cluster-54524.33189	--	--
Cluster-54524.90679	--	--
Cluster-54524.13029	--	--
Cluster-54524.67473	--	--
Cluster-54524.13026	--	--
Cluster-54524.98406	XP_005743293.1	PREDICTED: zinc finger protein 516-like isoform X1 [Pundamilia nyererei]>gi|548426345|ref|XP_005743294.1| PREDICTED: zinc finger protein 516-like isoform X2 [Pundamilia nyererei]>gi|548426349|ref|XP_005743295.1| PREDICTED: zinc finger protein 516-like isoform X3 [Pundamilia nyererei]
Cluster-78302.0	--	--
Cluster-54524.98404	XP_011336130.1	PREDICTED: synapsin, partial [Cerapachys biroi]
Cluster-54524.98403	XP_002429098.1	synoviolin, putative [Pediculus humanus corporis]>gi|212513962|gb|EEB16360.1| synoviolin, putative [Pediculus humanus corporis]
Cluster-54524.98402	--	--
Cluster-54524.98401	--	--
Cluster-54524.98409	EKC30444.1	Putative pre-mRNA-splicing factor ATP-dependent RNA helicase mog-5 [Crassostrea gigas]
Cluster-54524.80437	--	--
Cluster-54524.80436	KDR07534.1	hypothetical protein L798_02913 [Zootermopsis nevadensis]
Cluster-54524.80435	KDR07534.1	hypothetical protein L798_02913 [Zootermopsis nevadensis]
Cluster-54524.80432	--	--
Cluster-54524.149476	--	--
Cluster-54524.149474	--	--
Cluster-54524.16541	--	--
Cluster-54524.16542	--	--
Cluster-54524.16543	--	--
Cluster-54524.31851	--	--
Cluster-54524.31853	--	--
Cluster-54524.155262	NP_766163.2	zinc finger protein 277 isoform 1 [Mus musculus]
Cluster-54524.155261	AAA39398.2	ORF2 [Mus musculus domesticus]
Cluster-54524.2514	YP_778566.1	50S ribosomal protein L2 [Bigelowiella natans]>gi|122221275|sp|Q06J61.1|RK2_BIGNA RecName: Full=50S ribosomal protein L2, chloroplastic (chloroplast) [Bigelowiella natans]>gi|110810192|gb|ABG91398.1| 50S ribosomal protein L2 [Bigelowiella natans]
Cluster-54524.57918	--	--
Cluster-54524.50766	--	--
Cluster-54524.50763	--	--
Cluster-54524.15095	XP_008200881.1	PREDICTED: synaptic vesicular amine transporter [Tribolium castaneum]>gi|642912481|ref|XP_008200882.1| PREDICTED: synaptic vesicular amine transporter [Tribolium castaneum]
Cluster-54524.15092	--	--
Cluster-54524.127512	XP_005097005.1	PREDICTED: uncharacterized protein LOC101851945 [Aplysia californica]
Cluster-54524.86017	--	--
Cluster-54524.86014	--	--
Cluster-54524.86013	--	--
Cluster-54524.118391	XP_003490856.1	PREDICTED: uncharacterized protein LOC100745747 [Bombus impatiens]>gi|815915689|ref|XP_012243048.1| PREDICTED: uncharacterized protein LOC100745747 [Bombus impatiens]>gi|815915691|ref|XP_012243049.1| PREDICTED: uncharacterized protein LOC100745747 [Bombus impatiens]>gi|815915693|ref|XP_012243050.1| PREDICTED: uncharacterized protein LOC100745747 [Bombus impatiens]>gi|815915695|ref|XP_012243051.1|…
Cluster-54524.118390	AJO70016.1	sodium-hydrogen exchanger 3 [Cherax destructor]
Cluster-54524.118395	XP_011446972.1	PREDICTED: nucleoside diphosphate kinase 7-like [Crassostrea gigas]
Cluster-54524.118397	XP_011162177.1	PREDICTED: gastrin/cholecystokinin type B receptor-like isoform X2 [Solenopsis invicta]
Cluster-54524.118396	XP_011446972.1	PREDICTED: nucleoside diphosphate kinase 7-like [Crassostrea gigas]
Cluster-54524.72513	KFM77431.1	Homeobox protein SIX1, partial [Stegodyphus mimosarum]
Cluster-54524.72512	--	--
Cluster-54524.121684	XP_004077117.1	PREDICTED: progesterone-induced-blocking factor 1 [Oryzias latipes]
Cluster-54524.143910	--	--
Cluster-54524.19666	--	--
Cluster-54524.19667	XP_004936051.1	PREDICTED: protocadherin Fat 1 isoform X11 [Gallus gallus]
Cluster-70253.0	--	--
Cluster-2972.0	--	--
Cluster-54524.43167	XP_001027622.1	glutathione S-transferase, amine-terminal domain protein [Tetrahymena thermophila SB210]>gi|89309392|gb|EAS07380.1| glutathione S-transferase, amine-terminal domain protein [Tetrahymena thermophila SB210]
Cluster-54524.106974	--	--
Cluster-54524.106978	--	--
Cluster-54524.109890	CBY13234.1	unnamed protein product [Oikopleura dioica]
Cluster-54524.109891	BAK23256.1	discs large 1 [Gryllus bimaculatus]
Cluster-54524.109892	--	--
Cluster-54524.109893	--	--
Cluster-54524.109899	--	--
Cluster-54524.76705	--	--
Cluster-54524.82819	--	--
Cluster-54524.82818	--	--
Cluster-54524.82817	EFA13461.1	hypothetical protein TcasGA2_TC005061 [Tribolium castaneum]
Cluster-54524.82814	--	--
Cluster-79475.0	--	--
Cluster-54524.59701	--	--
Cluster-54524.59706	AEU11366.1	Broad-complex protein isoform 4 [Penaeus monodon]
Cluster-54524.59705	--	--
Cluster-54524.133338	--	--
Cluster-54524.96188	--	--
Cluster-54524.122075	EFX66751.1	hypothetical protein DAPPUDRAFT_331792 [Daphnia pulex]
Cluster-54524.122074	XP_006629631.1	PREDICTED: eukaryotic translation initiation factor 2-alpha kinase 3-like [Lepisosteus oculatus]
Cluster-54524.122077	--	--
Cluster-54524.122070	KDR18062.1	ARF GTPase-activating protein GIT2 [Zootermopsis nevadensis]
Cluster-54524.122073	AII32447.1	P38 [Eriocheir sinensis]
Cluster-54524.60176	--	--
Cluster-54524.14670	EHJ68963.1	hypothetical protein KGM_12108 [Danaus plexippus]
Cluster-54524.96185	--	--
Cluster-54524.34538	--	--
Cluster-54524.34537	--	--
Cluster-54524.34536	--	--
Cluster-54524.101409	XP_002606698.1	hypothetical protein BRAFLDRAFT_72535 [Branchiostoma floridae]>gi|229292042|gb|EEN62708.1| hypothetical protein BRAFLDRAFT_72535 [Branchiostoma floridae]
Cluster-54524.101408	--	--
Cluster-54524.101403	XP_001641516.1	predicted protein [Nematostella vectensis]>gi|156228655|gb|EDO49453.1| predicted protein, partial [Nematostella vectensis]
Cluster-54524.101402	--	--
Cluster-54524.101401	--	--
Cluster-54524.101406	AIZ00457.1	metal responsive transcription factor 1 [Oxya chinensis]
Cluster-54524.101404	XP_012149461.1	PREDICTED: zinc finger protein 148-like [Megachile rotundata]
Cluster-54524.93294	--	--
Cluster-54524.38199	ERL95340.1	hypothetical protein D910_12605 [Dendroctonus ponderosae]
Cluster-54524.53193	--	--
Cluster-54524.38191	--	--
Cluster-54524.30343	--	--
Cluster-54524.117830	ADI43984.1	TGF-alpha [Gryllus bimaculatus]
Cluster-54524.117837	--	--
Cluster-54524.75203	--	--
Cluster-54524.129809	ACO12598.1	Probable rRNA-processing protein EBP2 homolog [Lepeophtheirus salmonis]
Cluster-54524.129801	XP_012562968.1	PREDICTED: uncharacterized protein LOC105847753 [Hydra vulgaris]
Cluster-54524.100756	EFZ22572.1	hypothetical protein SINV_80052, partial [Solenopsis invicta]
Cluster-54524.100759	--	--
Cluster-54524.19339	--	--
Cluster-54524.95488	--	--
Cluster-54524.90759	--	--
Cluster-54524.74552	XP_005104944.1	PREDICTED: vacuolar protein-sorting-associated protein 25-like [Aplysia californica]
Cluster-54524.74556	--	--
Cluster-54524.74555	XP_011696622.1	PREDICTED: zinc finger protein 502-like [Wasmannia auropunctata]>gi|780676840|ref|XP_011696624.1| PREDICTED: zinc finger protein 502-like [Wasmannia auropunctata]>gi|780676845|ref|XP_011696625.1| PREDICTED: zinc finger protein 502-like [Wasmannia auropunctata]>gi|780676849|ref|XP_011696626.1| PREDICTED: zinc finger protein 502-like [Wasmannia auropunctata]>gi|780676852|ref|XP_011696627.1| PREDICT…
Cluster-54524.74559	--	--
Cluster-54524.111293	KDR14641.1	hypothetical protein L798_10748 [Zootermopsis nevadensis]
Cluster-54524.111292	--	--
Cluster-54524.111297	XP_011694887.1	PREDICTED: aldehyde dehydrogenase, dimeric NADP-preferring isoform X7 [Wasmannia auropunctata]
Cluster-54524.111296	BAB64297.1	I-connectin [Procambarus clarkii]
Cluster-54524.33616	ACC86854.1	C-type lectin-like domain-containing protein PtLP [Portunus trituberculatus]
Cluster-54524.33611	--	--
Cluster-54524.33613	XP_012282981.1	PREDICTED: neuropeptide Y receptor [Orussus abietinus]
Cluster-72533.1	--	--
Cluster-54524.114515	XP_009894681.1	PREDICTED: N-acetylglucosamine-1-phosphotransferase subunits alpha/beta [Picoides pubescens]>gi|678197229|gb|KFV64211.1| N-acetylglucosamine-1-phosphotransferase subunits alpha/beta [Picoides pubescens]
Cluster-54524.114514	XP_003728518.1	PREDICTED: DNA repair protein XRCC3 [Strongylocentrotus purpuratus]
Cluster-54524.114513	EHJ76849.1	hypothetical protein KGM_17317 [Danaus plexippus]
Cluster-54524.114511	--	--
Cluster-54524.114519	XP_011304506.1	PREDICTED: probable histone-lysine N-methyltransferase CG1716 [Fopius arisanus]
Cluster-54524.150231	--	--
Cluster-30086.0	--	--
Cluster-54524.151549	EFN67324.1	Ryanodine receptor 44F [Camponotus floridanus]
Cluster-54524.68711	--	--
Cluster-54524.68717	--	--
Cluster-54524.12203	--	--
Cluster-54524.12202	--	--
Cluster-54524.12200	--	--
Cluster-54524.103474	--	--
Cluster-54524.103476	--	--
Cluster-54524.103477	XP_011255824.1	PREDICTED: protein lap4 isoform X3 [Camponotus floridanus]>gi|307180798|gb|EFN68662.1| Protein lap4 [Camponotus floridanus]
Cluster-54524.103470	--	--
Cluster-54524.103471	XP_002424906.1	conserved hypothetical protein [Pediculus humanus corporis]>gi|212508486|gb|EEB12168.1| conserved hypothetical protein [Pediculus humanus corporis]
Cluster-54524.17780	--	--
Cluster-54524.17783	XP_008497167.1	PREDICTED: mannose-1-phosphate guanyltransferase beta isoform X2 [Calypte anna]
Cluster-54524.17782	--	--
Cluster-3609.0	XP_009045128.1	hypothetical protein LOTGIDRAFT_224051 [Lottia gigantea]>gi|556115530|gb|ESP04182.1| hypothetical protein LOTGIDRAFT_224051 [Lottia gigantea]
Cluster-54524.29654	--	--
Cluster-54524.85252	--	--
Cluster-54524.29651	--	--
Cluster-71588.0	--	--
Cluster-54524.119837	--	--
Cluster-54524.119835	--	--
Cluster-54524.119832	BAO01105.1	neuropeptide GPCR B5 [Nilaparvata lugens]
Cluster-54524.119830	XP_011633532.1	PREDICTED: dedicator of cytokinesis protein 3 isoform X2 [Pogonomyrmex barbatus]
Cluster-2481.0	--	--
Cluster-54524.119838	--	--
Cluster-54524.61259	--	--
Cluster-54524.61257	--	--
Cluster-54524.61255	--	--
Cluster-54524.61252	--	--
Cluster-54524.97644	--	--
Cluster-54524.97647	ETE64703.1	Beta-hexosaminidase subunit beta, partial [Ophiophagus hannah]
Cluster-54524.91463	AGM32395.1	tetraspanin-18 [Coptotermes formosanus]
Cluster-54524.91460	ADZ96217.1	JHE-like carboxylesterase 1 [Pandalopsis japonica]
Cluster-54524.91461	--	--
Cluster-54524.91465	XP_002431023.1	limbic system-associated membrane protein precursor, putative [Pediculus humanus corporis]>gi|212516252|gb|EEB18285.1| limbic system-associated membrane protein precursor, putative [Pediculus humanus corporis]
Cluster-54524.99651	--	--
Cluster-54524.99650	KDR11826.1	hypothetical protein L798_14251 [Zootermopsis nevadensis]
Cluster-54524.99653	EFX74052.1	syntaxin-13-like protein [Daphnia pulex]
Cluster-54524.127284	--	--
Cluster-54524.127282	--	--
Cluster-54524.127289	--	--
Cluster-54524.127288	--	--
Cluster-54524.125869	--	--
Cluster-54524.96166	--	--
Cluster-54524.96167	--	--
Cluster-54524.126154	--	--
Cluster-54524.96161	--	--
Cluster-54524.126158	--	--
Cluster-54524.19314	XP_004347960.2	hypothetical protein CAOG_04135 [Capsaspora owczarzaki ATCC 30864]>gi|765552708|gb|KJE93329.1| hypothetical protein CAOG_004135 [Capsaspora owczarzaki ATCC 30864]
Cluster-54524.66709	--	--
Cluster-54524.66708	AFP92126.1	plasmolipin isoform 1 [Penaeus monodon]
Cluster-54524.66705	DAA27110.1	TPA: bitter taste receptor Bota-T2R65A-like [Bos taurus]
Cluster-54524.66704	XP_012264747.1	PREDICTED: COP9 signalosome complex subunit 2 [Athalia rosae]
Cluster-54524.66706	KFM65160.1	Zinc finger protein 227, partial [Stegodyphus mimosarum]
Cluster-54524.66703	--	--
Cluster-37717.0	--	--
Cluster-54524.132307	XP_011864069.1	PREDICTED: innexin inx7 isoform X1 [Vollenhovia emeryi]
Cluster-54524.132305	--	--
Cluster-54524.132300	EFX89066.1	hypothetical protein DAPPUDRAFT_304677 [Daphnia pulex]
Cluster-54524.119378	--	--
Cluster-54524.28536	--	--
Cluster-54524.5144	XP_001648950.1	AAEL014527-PA [Aedes aegypti]>gi|108868984|gb|EAT33209.1| AAEL014527-PA [Aedes aegypti]
Cluster-54524.79798	--	--
Cluster-54524.124191	EFX83258.1	hypothetical protein DAPPUDRAFT_48062, partial [Daphnia pulex]
Cluster-54524.124192	EFX83258.1	hypothetical protein DAPPUDRAFT_48062, partial [Daphnia pulex]
Cluster-54524.124142	--	--
Cluster-54524.124149	--	--
Cluster-54524.107105	--	--
Cluster-54524.84510	--	--
Cluster-43451.0	--	--
Cluster-54524.84514	XP_011561215.1	PREDICTED: uncharacterized protein LOC105391439 [Plutella xylostella]
Cluster-54524.84258	--	--
Cluster-54524.84517	XP_002423235.1	ubiquitin-conjugating enzyme morgue, putative [Pediculus humanus corporis]>gi|212506214|gb|EEB10497.1| ubiquitin-conjugating enzyme morgue, putative [Pediculus humanus corporis]
Cluster-54524.107908	--	--
Cluster-54524.107907	EKC35946.1	Serine--pyruvate aminotransferase, mitochondrial [Crassostrea gigas]
Cluster-54524.78651	--	--
Cluster-54524.78653	--	--
Cluster-54524.89649	--	--
Cluster-54524.143892	XP_004932955.2	PREDICTED: thyroglobulin-like [Bombyx mori]
Cluster-54524.104456	--	--
Cluster-54524.32812	--	--
Cluster-54524.56961	KDR14857.1	Multiple C2 and transmembrane domain-containing protein 1, partial [Zootermopsis nevadensis]
Cluster-54524.56964	--	--
Cluster-54524.56965	KDR14857.1	Multiple C2 and transmembrane domain-containing protein 1, partial [Zootermopsis nevadensis]
Cluster-54524.123267	--	--
Cluster-54524.123269	--	--
Cluster-54524.123268	--	--
Cluster-54524.103106	XP_008199214.1	PREDICTED: protein rolling stone-like [Tribolium castaneum]
Cluster-54524.103100	NP_001159624.1	G protein alpha subunit 73B-like protein [Bombyx mori]>gi|217069564|gb|ACJ83251.1| G protein alpha subunit Galpha73B [Bombyx mori]
Cluster-54524.103101	--	--
Cluster-54524.103102	--	--
Cluster-54524.103103	--	--
Cluster-54524.66793	--	--
Cluster-54524.66795	--	--
Cluster-20654.0	--	--
Cluster-54524.53566	--	--
Cluster-54524.117979	AAC61691.1	inositol 1,4,5-trisphosphate receptor [Panulirus argus]
Cluster-54524.117974	XP_011676220.1	PREDICTED: arylsulfatase A [Strongylocentrotus purpuratus]
Cluster-54524.62892	--	--
Cluster-54524.117970	--	--
Cluster-54524.117971	EFX70975.1	hypothetical protein DAPPUDRAFT_31637, partial [Daphnia pulex]
Cluster-54524.117972	XP_009984366.1	PREDICTED: arylsulfatase A, partial [Tauraco erythrolophus]
Cluster-54524.7810	--	--
Cluster-54524.38655	--	--
Cluster-54524.146595	KII61927.1	Transposon Ty3-G Gag-Pol polyprotein [Thelohanellus kitauei]>gi|749725080|gb|KII71382.1| Transposon Ty3-G Gag-Pol polyprotein [Thelohanellus kitauei]
Cluster-54524.105194	--	--
Cluster-54524.105196	KFM67150.1	hypothetical protein X975_02699, partial [Stegodyphus mimosarum]
Cluster-54524.152513	--	--
Cluster-54524.95188	ERL89320.1	hypothetical protein D910_06692 [Dendroctonus ponderosae]
Cluster-54524.95184	EFX89771.1	hypothetical protein DAPPUDRAFT_190512 [Daphnia pulex]
Cluster-54524.95187	XP_008199678.1	PREDICTED: uncharacterized protein LOC661025 isoform X5 [Tribolium castaneum]
Cluster-54524.95186	--	--
Cluster-54524.95182	XP_971597.2	PREDICTED: methionine--tRNA ligase, mitochondrial [Tribolium castaneum]
Cluster-3505.0	--	--
Cluster-54524.78794	--	--
Cluster-54524.77158	--	--
Cluster-54524.153644	--	--
Cluster-54524.98046	--	--
Cluster-54524.149825	--	--
Cluster-54524.94279	--	--
Cluster-54524.50038	--	--
Cluster-54524.94277	--	--
Cluster-54524.94270	--	--
Cluster-54524.94272	XP_008483254.1	PREDICTED: E3 ubiquitin-protein ligase TRIP12-like, partial [Diaphorina citri]
Cluster-54524.65989	KMQ96649.1	homocysteine-responsive endoplasmic reticulum-resident ubiquitin-like domain member 2 protein [Lasius niger]
Cluster-54524.65983	ACJ23247.1	gamma-interferon-inducible lysosomal thiol reductase [Penaeus monodon]
Cluster-54524.65980	--	--
Cluster-54524.91989	KDR15515.1	Transcriptional activator protein Pur-alpha [Zootermopsis nevadensis]
Cluster-54524.120869	NP_001070025.1	dehydrogenase/reductase SDR family member 12 [Danio rerio]>gi|115291989|gb|AAI22378.1| Zgc:153679 [Danio rerio]
Cluster-54524.91981	--	--
Cluster-54524.120863	--	--
Cluster-54524.60005	--	--
Cluster-54524.60006	--	--
Cluster-54524.137974	--	--
Cluster-54524.57568	XP_012259953.1	PREDICTED: uncharacterized protein LOC105688341 isoform X2 [Athalia rosae]
Cluster-54524.57567	KDR17917.1	NEDD4-like E3 ubiquitin-protein ligase WWP1 [Zootermopsis nevadensis]
Cluster-54524.57566	--	--
Cluster-54524.57560	--	--
Cluster-54524.57563	XP_002424554.1	conserved hypothetical protein [Pediculus humanus corporis]>gi|212507997|gb|EEB11816.1| conserved hypothetical protein [Pediculus humanus corporis]
Cluster-54524.93722	ADX33287.1	granulin-like protein [Biomphalaria glabrata]
Cluster-54524.93727	AEI88120.1	nuclear pore-targeting complex component of 58 kda-like protein [Scylla paramamosain]
Cluster-54524.93726	EFX87746.1	hypothetical protein DAPPUDRAFT_22032, partial [Daphnia pulex]
Cluster-54524.84367	--	--
Cluster-54524.69314	--	--
Cluster-54524.75796	--	--
Cluster-54524.84364	--	--
Cluster-54524.88033	--	--
Cluster-54524.117787	--	--
Cluster-54524.117786	KDR13581.1	Proteasome-associated protein ECM29-like protein [Zootermopsis nevadensis]
Cluster-54524.117783	XP_011638540.1	PREDICTED: dephospho-CoA kinase domain-containing protein [Pogonomyrmex barbatus]
Cluster-54524.127128	XP_011693330.1	PREDICTED: tyrosine-protein phosphatase non-receptor type 9 [Wasmannia auropunctata]
Cluster-54524.97119	EKC35946.1	Serine--pyruvate aminotransferase, mitochondrial [Crassostrea gigas]
Cluster-54524.53718	--	--
Cluster-54524.106849	--	--
Cluster-54524.88030	--	--
Cluster-54524.61353	--	--
Cluster-54524.61355	EFX66814.1	hypothetical protein DAPPUDRAFT_115964 [Daphnia pulex]
Cluster-54524.61354	EFX66814.1	hypothetical protein DAPPUDRAFT_115964 [Daphnia pulex]
Cluster-54524.89955	--	--
Cluster-54524.19293	--	--
Cluster-54524.110250	AJP31314.1	broad-complex-like protein [Macrobrachium nipponense]
Cluster-54524.110252	--	--
Cluster-54524.110255	XP_002432742.1	tyrosine-protein kinase, putative [Pediculus humanus corporis]>gi|212518227|gb|EEB20004.1| tyrosine-protein kinase, putative [Pediculus humanus corporis]
Cluster-54524.110256	XP_002432742.1	tyrosine-protein kinase, putative [Pediculus humanus corporis]>gi|212518227|gb|EEB20004.1| tyrosine-protein kinase, putative [Pediculus humanus corporis]
Cluster-54524.96642	KDR12141.1	COP9 signalosome complex subunit 7a [Zootermopsis nevadensis]
Cluster-54524.96646	KDR20657.1	Golgi-associated plant pathogenesis-related protein 1 [Zootermopsis nevadensis]
Cluster-54524.96645	XP_001233574.1	PREDICTED: C-factor-like isoform X1 [Gallus gallus]
Cluster-54524.96648	XP_008467676.1	PREDICTED: activin receptor type-1 [Diaphorina citri]
Cluster-54524.140142	XP_011450646.1	PREDICTED: nose resistant to fluoxetine protein 6-like [Crassostrea gigas]
Cluster-54524.52049	--	--
Cluster-54524.52045	--	--
Cluster-54524.52043	XP_008544896.1	PREDICTED: 5-hydroxytryptamine receptor 2A-like [Microplitis demolitor]
Cluster-54524.52042	--	--
Cluster-54524.92819	--	--
Cluster-54524.147977	--	--
Cluster-54524.123718	KFM71930.1	Guanine nucleotide exchange factor VAV2, partial [Stegodyphus mimosarum]
Cluster-54524.123717	KFM71930.1	Guanine nucleotide exchange factor VAV2, partial [Stegodyphus mimosarum]
Cluster-54524.123711	EFN77519.1	Protein boule [Harpegnathos saltator]
Cluster-18112.0	--	--
Cluster-54524.136297	--	--
Cluster-54524.55903	EFX71274.1	hypothetical protein DAPPUDRAFT_227990 [Daphnia pulex]
Cluster-54524.92918	--	--
Cluster-54524.79674	ELK28635.1	tRNA (adenine-N(1)-)-methyltransferase catalytic subunit TRMT61A [Myotis davidii]
Cluster-54524.82689	XP_008113693.1	PREDICTED: dnaJ homolog subfamily C member 10 [Anolis carolinensis]
Cluster-54524.82682	ACL79888.1	putative elastin a [Rimicaris exoculata]
Cluster-54524.102521	XP_002431788.1	papilin, putative [Pediculus humanus corporis]>gi|212517113|gb|EEB19050.1| papilin, putative [Pediculus humanus corporis]
Cluster-54524.102520	--	--
Cluster-54524.102522	KMQ95268.1	papilin-like protein, partial [Lasius niger]
Cluster-54524.109291	--	--
Cluster-54524.58887	XP_011061718.1	PREDICTED: transcriptional adapter 2B isoform X2 [Acromyrmex echinatior]
Cluster-54524.58886	KFM56790.1	F-box/LRR-repeat protein 7, partial [Stegodyphus mimosarum]
Cluster-54524.109601	XP_008188490.1	PREDICTED: ubiquitin carboxyl-terminal hydrolase 32 [Acyrthosiphon pisum]>gi|641679269|ref|XP_008188491.1| PREDICTED: ubiquitin carboxyl-terminal hydrolase 32 [Acyrthosiphon pisum]
Cluster-54524.109602	XP_006614450.1	PREDICTED: putative transcription factor capicua-like isoform X2 [Apis dorsata]
Cluster-54524.109605	KDR21701.1	GTP-binding protein 2 [Zootermopsis nevadensis]
Cluster-54524.109607	XP_006005374.1	PREDICTED: NEDD4-binding protein 2-like 1 isoform X1 [Latimeria chalumnae]
Cluster-54524.109606	XP_012543460.1	PREDICTED: SPARC-related modular calcium-binding protein 2 [Monomorium pharaonis]
Cluster-54524.109609	--	--
Cluster-54524.131882	--	--
Cluster-54524.23508	--	--
Cluster-54524.142452	--	--
Cluster-54524.142454	--	--
Cluster-54524.100387	XP_007059543.1	PREDICTED: zinc finger protein 484-like, partial [Chelonia mydas]
Cluster-54524.100386	--	--
Cluster-54524.100381	--	--
Cluster-54524.100388	Q9U620.1	RecName: Full=Copper-specific metallothionein-2; AltName: Full=CuMT-II [Callinectes sapidus]>gi|6449393|gb|AAF08966.1| copper-specific metallothionein CuMT-II [Callinectes sapidus]
Cluster-54524.74180	--	--
Cluster-54524.141908	XP_011604005.1	PREDICTED: pleckstrin homology domain-containing family G member 4B isoform X2 [Takifugu rubripes]
Cluster-54524.74185	--	--
Cluster-54524.74186	--	--
Cluster-54524.74188	XP_011861474.1	PREDICTED: uncharacterized protein LOC105558416 isoform X2 [Vollenhovia emeryi]
Cluster-54524.141901	XP_011436219.1	PREDICTED: solute carrier family 35 member E2-like [Crassostrea gigas]
Cluster-54524.141905	--	--
Cluster-54524.108552	XP_012284907.1	PREDICTED: synaptosomal-associated protein 29 [Orussus abietinus]
Cluster-54524.108550	XP_008409611.1	PREDICTED: protein FAM185A [Poecilia reticulata]
Cluster-54524.108556	--	--
Cluster-54524.108554	XP_012284907.1	PREDICTED: synaptosomal-associated protein 29 [Orussus abietinus]
Cluster-54524.108555	XP_012284907.1	PREDICTED: synaptosomal-associated protein 29 [Orussus abietinus]
Cluster-54524.108559	KDR16109.1	1-phosphatidylinositol-4,5-bisphosphate phosphodiesterase epsilon-1, partial [Zootermopsis nevadensis]
Cluster-54524.72298	--	--
Cluster-54524.61791	--	--
Cluster-54524.105604	EFX66475.1	hypothetical protein DAPPUDRAFT_10162, partial [Daphnia pulex]
Cluster-54524.105607	--	--
Cluster-54524.105603	--	--
Cluster-54524.105602	--	--
Cluster-54524.105608	--	--
Cluster-54524.100890	--	--
Cluster-54524.43892	--	--
Cluster-54524.145100	XP_003490978.1	PREDICTED: organic cation transporter protein-like [Bombus impatiens]>gi|815916151|ref|XP_012243248.1| PREDICTED: organic cation transporter protein-like [Bombus impatiens]>gi|815916153|ref|XP_012243249.1| PREDICTED: organic cation transporter protein-like [Bombus impatiens]>gi|815916155|ref|XP_012243250.1| PREDICTED: organic cation transporter protein-like [Bombus impatiens]
Cluster-54524.32997	--	--
Cluster-54524.32998	ABK88280.1	CAP-3 [Litopenaeus vannamei]
Cluster-54524.88029	AFC61248.1	serine proteinase 1 [Portunus trituberculatus]
Cluster-54524.88020	XP_002422939.1	conserved hypothetical protein [Pediculus humanus corporis]>gi|212505838|gb|EEB10201.1| conserved hypothetical protein [Pediculus humanus corporis]
Cluster-54524.88021	XP_001848743.1	polypyrimidine tract binding protein [Culex quinquefasciatus]>gi|167865566|gb|EDS28949.1| polypyrimidine tract binding protein [Culex quinquefasciatus]
Cluster-54524.88024	--	--
Cluster-54524.88025	--	--
Cluster-54524.88026	XP_011570634.1	PREDICTED: translation initiation factor eIF-2B subunit gamma isoform X1 [Aquila chrysaetos canadensis]
Cluster-54524.44636	--	--
Cluster-73998.0	--	--
Cluster-54524.44638	XP_010347552.1	PREDICTED: 60S ribosomal protein L11 isoform X1 [Saimiri boliviensis boliviensis]>gi|725552976|ref|XP_010347558.1| PREDICTED: 60S ribosomal protein L11 isoform X2 [Saimiri boliviensis boliviensis]
Cluster-54524.109733	--	--
Cluster-54524.59678	--	--
Cluster-54524.54926	--	--
Cluster-54524.144277	--	--
Cluster-54524.144273	XP_008192323.1	PREDICTED: UDP-glucuronosyltransferase 2C1 [Tribolium castaneum]
Cluster-54524.144272	ERL85659.1	hypothetical protein D910_03076 [Dendroctonus ponderosae]
Cluster-54524.144271	KDR20744.1	UDP-glucuronosyltransferase 2B1 [Zootermopsis nevadensis]
Cluster-54524.51919	XP_002429147.1	conserved hypothetical protein [Pediculus humanus corporis]>gi|212514020|gb|EEB16409.1| conserved hypothetical protein [Pediculus humanus corporis]
Cluster-54524.65472	--	--
Cluster-54524.65473	--	--
Cluster-54524.65470	--	--
Cluster-54524.65471	--	--
Cluster-54524.65476	--	--
Cluster-54524.65477	XP_002427419.1	conserved hypothetical protein [Pediculus humanus corporis]>gi|212511799|gb|EEB14681.1| conserved hypothetical protein [Pediculus humanus corporis]
Cluster-54524.65475	XP_011436884.1	PREDICTED: zinc finger protein GLIS2-like [Crassostrea gigas]>gi|762108518|ref|XP_011436885.1| PREDICTED: zinc finger protein GLIS2-like [Crassostrea gigas]>gi|762108520|ref|XP_011436886.1| PREDICTED: zinc finger protein GLIS2-like [Crassostrea gigas]>gi|762108522|ref|XP_011436887.1| PREDICTED: zinc finger protein GLIS2-like [Crassostrea gigas]>gi|762108524|ref|XP_011436888.1| PREDICTED: zinc fin…
Cluster-54524.118238	--	--
Cluster-54524.118239	--	--
Cluster-54524.80125	--	--
Cluster-54524.93440	KDR11626.1	Oxidation resistance protein 1, partial [Zootermopsis nevadensis]
Cluster-54524.93446	KDR13092.1	Type II inositol-1,4,5-trisphosphate 5-phosphatase [Zootermopsis nevadensis]
Cluster-54524.93447	XP_012258640.1	PREDICTED: cartilage oligomeric matrix protein [Athalia rosae]
Cluster-54524.93448	XP_002416368.1	irregular chiasm C-roughest protein, putative [Ixodes scapularis]>gi|215510582|gb|EEC20035.1| irregular chiasm C-roughest protein, putative, partial [Ixodes scapularis]
Cluster-54524.93449	EFX72587.1	hypothetical protein DAPPUDRAFT_308208 [Daphnia pulex]
Cluster-54524.84394	EKC32269.1	Xaa-Pro aminopeptidase 1 [Crassostrea gigas]
Cluster-54524.42967	--	--
Cluster-54524.141023	--	--
Cluster-54524.122869	KDR19126.1	Phosphatidylinositide phosphatase SAC2 [Zootermopsis nevadensis]
Cluster-54524.141029	--	--
Cluster-77445.0	--	--
Cluster-54524.100854	--	--
Cluster-54524.112451	--	--
Cluster-54524.146256	--	--
Cluster-54524.130903	--	--
Cluster-54524.81451	KDR17158.1	Transport and Golgi organization protein 11 [Zootermopsis nevadensis]
Cluster-54524.78593	--	--
Cluster-54524.66352	KDR08945.1	Solute carrier family 25 member 38 [Zootermopsis nevadensis]
Cluster-54524.66351	--	--
Cluster-54524.66356	--	--
Cluster-54524.66357	XP_011633532.1	PREDICTED: dedicator of cytokinesis protein 3 isoform X2 [Pogonomyrmex barbatus]
Cluster-3058.0	KII75018.1	Transposon Tf2-6 polyprotein [Thelohanellus kitauei]
Cluster-54524.152495	--	--
Cluster-54524.111052	--	--
Cluster-54524.111056	--	--
Cluster-54524.4629	--	--
Cluster-54524.112503	XP_003963909.1	PREDICTED: nuclear nucleic acid-binding protein C1D [Takifugu rubripes]
Cluster-54524.112501	KDR07796.1	Lysophospholipid acyltransferase 5 [Zootermopsis nevadensis]
Cluster-54524.112506	EFX87996.1	Octopamine receptor beta-2-like protein [Daphnia pulex]
Cluster-54524.112507	XP_008198078.1	PREDICTED: octopamine receptor beta-3R-like isoform X1 [Tribolium castaneum]
Cluster-54524.112458	--	--
Cluster-54524.95068	--	--
Cluster-54524.51220	KDR14429.1	hypothetical protein L798_11746 [Zootermopsis nevadensis]
Cluster-54524.51221	XP_004566661.1	PREDICTED: malate synthase, glyoxysomal-like [Maylandia zebra]>gi|499031914|ref|XP_004566662.1| PREDICTED: malate synthase, glyoxysomal-like [Maylandia zebra]
Cluster-54524.95062	XP_002101337.1	GE15682 [Drosophila yakuba]>gi|194188861|gb|EDX02445.1| GE15682 [Drosophila yakuba]
Cluster-54524.95063	KFM61721.1	Protein mab-21, partial [Stegodyphus mimosarum]
Cluster-54524.95061	--	--
Cluster-54524.95065	--	--
Cluster-54524.112459	--	--
Cluster-54524.149787	--	--
Cluster-54524.32766	--	--
Cluster-54524.104475	--	--
Cluster-54524.136901	XP_001455044.1	hypothetical protein [Paramecium tetraurelia strain d4-2]>gi|124422832|emb|CAK87647.1| unnamed protein product [Paramecium tetraurelia]
Cluster-54524.35234	--	--
Cluster-54524.35237	--	--
Cluster-54524.35236	--	--
Cluster-54524.35231	--	--
Cluster-54524.35233	--	--
Cluster-54524.35239	AAF64305.1	hemocyanin subunit [Callinectes sapidus]
Cluster-54524.152588	AAA86463.1	Csa-19 [Homo sapiens]
Cluster-54524.125455	XP_320177.4	AGAP012381-PA [Anopheles gambiae str. PEST]>gi|157013031|gb|EAA00140.4| AGAP012381-PA [Anopheles gambiae str. PEST]
Cluster-75966.0	--	--
Cluster-54524.116337	--	--
Cluster-54524.116336	--	--
Cluster-54524.100508	--	--
Cluster-54524.100277	XP_011442406.1	PREDICTED: RNA-directed DNA polymerase from mobile element jockey-like [Crassostrea gigas]
Cluster-54524.38026	--	--
Cluster-68674.0	--	--
Cluster-54524.56906	--	--
Cluster-54524.56903	--	--
Cluster-54524.100279	--	--
Cluster-54524.117063	XP_008474532.1	PREDICTED: zinc finger protein 239-like [Diaphorina citri]
Cluster-54524.117061	--	--
Cluster-54524.117066	KDR16917.1	hypothetical protein L798_09226, partial [Zootermopsis nevadensis]
Cluster-54524.117067	XP_003395903.1	PREDICTED: lysophospholipid acyltransferase 1 [Bombus terrestris]
Cluster-54524.74076	--	--
Cluster-54524.102443	XP_011194854.1	PREDICTED: fibroblast growth factor receptor 1-A [Bactrocera cucurbitae]
Cluster-54524.102440	XP_008553546.1	PREDICTED: mRNA export factor [Microplitis demolitor]
Cluster-54524.91983	KDR08860.1	Tumor protein D54 [Zootermopsis nevadensis]
Cluster-54524.99490	--	--
Cluster-54524.99499	XP_003394510.1	PREDICTED: mediator of DNA damage checkpoint protein 1 [Bombus terrestris]
Cluster-54524.123694	--	--
Cluster-54524.123695	--	--
Cluster-54524.91985	--	--
Cluster-54524.104829	XP_009168073.1	hypothetical protein T265_04941 [Opisthorchis viverrini]>gi|663052210|gb|KER28185.1| hypothetical protein T265_04941 [Opisthorchis viverrini]
Cluster-54524.104822	ERL83363.1	hypothetical protein D910_00282 [Dendroctonus ponderosae]>gi|546680124|gb|ERL90465.1| hypothetical protein D910_07814 [Dendroctonus ponderosae]
Cluster-54524.104820	XP_002069253.1	GK21065 [Drosophila willistoni]>gi|194165338|gb|EDW80239.1| GK21065 [Drosophila willistoni]
Cluster-54524.108461	--	--
Cluster-54524.41422	--	--
Cluster-54524.59681	--	--
Cluster-54524.147830	KII75018.1	Transposon Tf2-6 polyprotein [Thelohanellus kitauei]
Cluster-54524.147831	EJY88541.1	26S protease regulatory subunit 4 [Oxytricha trifallax]
Cluster-54524.98726	XP_006642325.1	PREDICTED: centromere/kinetochore protein zw10 homolog [Lepisosteus oculatus]
Cluster-54524.98727	XP_003703936.1	PREDICTED: centromere/kinetochore protein zw10 homolog [Megachile rotundata]>gi|805791540|ref|XP_012142032.1| PREDICTED: centromere/kinetochore protein zw10 homolog [Megachile rotundata]>gi|805791543|ref|XP_012142033.1| PREDICTED: centromere/kinetochore protein zw10 homolog [Megachile rotundata]
Cluster-54524.98722	XP_008191056.1	PREDICTED: protein unc-80 homolog [Tribolium castaneum]
Cluster-54524.98723	XP_008191056.1	PREDICTED: protein unc-80 homolog [Tribolium castaneum]
Cluster-54524.98729	EFZ14493.1	hypothetical protein SINV_08970, partial [Solenopsis invicta]
Cluster-54524.81072	KFQ13062.1	Myb/SANT-like DNA-binding domain-containing protein 3, partial [Leptosomus discolor]
Cluster-54524.81073	EFN89117.1	Muscle M-line assembly protein unc-89 [Harpegnathos saltator]
Cluster-54524.108852	--	--
Cluster-54524.108856	--	--
Cluster-54524.108855	KDR22779.1	hypothetical protein L798_00618, partial [Zootermopsis nevadensis]
Cluster-54524.102288	XP_005090700.1	PREDICTED: beta-hexosaminidase subunit alpha-like [Aplysia californica]
Cluster-54524.102289	KDR17734.1	Beta-hexosaminidase subunit beta [Zootermopsis nevadensis]
Cluster-54524.102282	--	--
Cluster-54524.89207	XP_001636235.1	predicted protein [Nematostella vectensis]>gi|156223336|gb|EDO44172.1| predicted protein [Nematostella vectensis]
Cluster-54524.89205	XP_012542232.1	PREDICTED: pro-resilin-like [Monomorium pharaonis]
Cluster-54524.89204	--	--
Cluster-54524.89203	CCE46010.1	putative DEAD-box ATP-dependent RNA helicase [Cancer pagurus]
Cluster-54524.89202	XP_006568280.1	PREDICTED: RING-box protein 1A isoform X1 [Apis mellifera]>gi|572263409|ref|XP_006609915.1| PREDICTED: RING-box protein 1A-like isoform X1 [Apis dorsata]
Cluster-54524.89201	--	--
Cluster-54524.89200	ELK37276.1	hypothetical protein MDA_GLEAN10012073 [Myotis davidii]
Cluster-54524.89209	--	--
Cluster-54524.37758	AKP18003.1	chitinase 4 [Eriocheir sinensis]
Cluster-54524.82522	--	--
Cluster-54524.82520	XP_012287315.1	PREDICTED: pyrimidodiazepine synthase-like [Orussus abietinus]
Cluster-54524.107506	KDR17158.1	Transport and Golgi organization protein 11 [Zootermopsis nevadensis]
Cluster-54524.107507	NP_001025274.1	nucleoside diphosphate-linked moiety X motif 17 [Danio rerio]>gi|82225990|sp|Q4V8V2.1|NUD17_DANRE RecName: Full=Nucleoside diphosphate-linked moiety X motif 17; Short=Nudix motif 17>gi|66911379|gb|AAH97186.1| Zgc:114128 [Danio rerio]
Cluster-54524.107502	EFX66028.1	hypothetical protein DAPPUDRAFT_116764 [Daphnia pulex]
Cluster-54524.107503	XP_011167462.1	PREDICTED: hydroxyacid oxidase 1 [Solenopsis invicta]
Cluster-54524.58372	--	--
Cluster-54524.107509	XP_007436510.1	PREDICTED: G-protein coupled receptor 1 isoform X1 [Python bivittatus]>gi|602661726|ref|XP_007436511.1| PREDICTED: G-protein coupled receptor 1 isoform X2 [Python bivittatus]>gi|602661728|ref|XP_007436512.1| PREDICTED: G-protein coupled receptor 1 isoform X3 [Python bivittatus]>gi|602661730|ref|XP_007436513.1| PREDICTED: G-protein coupled receptor 1 isoform X4 [Python bivittatus]>gi|602661732|ref…
Cluster-54524.143201	--	--
Cluster-54524.142554	XP_001641427.1	predicted protein [Nematostella vectensis]>gi|156228566|gb|EDO49364.1| predicted protein [Nematostella vectensis]
Cluster-54524.142557	--	--
Cluster-54524.142551	XP_007663894.1	PREDICTED: DNA replication ATP-dependent helicase/nuclease DNA2 [Ornithorhynchus anatinus]
Cluster-54524.142552	XP_011433594.1	PREDICTED: DNA replication ATP-dependent helicase/nuclease DNA2-like [Crassostrea gigas]
Cluster-54524.108784	--	--
Cluster-54524.83698	--	--
Cluster-54524.83699	AHH85804.1	hypoxia inducible factor 1 alpha [Eriocheir sinensis]
Cluster-54524.83692	XP_004054894.1	PREDICTED: uncharacterized protein LOC101140100 [Gorilla gorilla gorilla]
Cluster-54524.83693	--	--
Cluster-54524.83691	EFX74271.1	hypothetical protein DAPPUDRAFT_109099 [Daphnia pulex]
Cluster-54524.83695	XP_008475546.1	PREDICTED: uncharacterized protein LOC103512554 [Diaphorina citri]
Cluster-54524.82187	--	--
Cluster-54524.82189	--	--
Cluster-54524.72081	--	--
Cluster-54524.147005	--	--
Cluster-54524.147004	EGT31384.1	CBN-EIF-6 protein [Caenorhabditis brenneri]
Cluster-69028.0	AAA50388.1	elongation factor 2, partial [Homo sapiens]
Cluster-54524.63147	--	--
Cluster-54524.103776	--	--
Cluster-54524.24500	--	--
Cluster-54524.72811	EFX80780.1	hypothetical protein DAPPUDRAFT_438, partial [Daphnia pulex]
Cluster-23302.0	XP_012532784.1	PREDICTED: threonine--tRNA ligase, cytoplasmic-like [Monomorium pharaonis]
Cluster-54524.72817	KDR20394.1	hypothetical protein L798_04928, partial [Zootermopsis nevadensis]
Cluster-54524.68804	--	--
Cluster-54524.43299	--	--
Cluster-54524.68806	--	--
Cluster-54524.68802	--	--
Cluster-54524.61948	--	--
Cluster-54524.13	--	--
Cluster-54524.76245	--	--
Cluster-54524.76247	--	--
Cluster-54524.47853	--	--
Cluster-54524.112298	--	--
Cluster-54524.112299	KFM62098.1	Kinase suppressor of Ras 2, partial [Stegodyphus mimosarum]
Cluster-54524.112292	--	--
Cluster-54524.112291	KDR13022.1	hypothetical protein L798_13230, partial [Zootermopsis nevadensis]
Cluster-54524.112294	--	--
Cluster-54524.64668	KDR18063.1	Ankyrin repeat domain-containing protein 13B [Zootermopsis nevadensis]
Cluster-54524.105140	XP_007126505.1	PREDICTED: methyltransferase-like protein 25 isoform X2 [Physeter catodon]
Cluster-54524.64662	--	--
Cluster-54524.64666	--	--
Cluster-54524.62499	XP_011314583.1	PREDICTED: GON-4-like protein [Fopius arisanus]>gi|755933224|ref|XP_011314584.1| PREDICTED: GON-4-like protein [Fopius arisanus]
Cluster-54524.62495	XP_974369.1	PREDICTED: Krueppel-like factor 13 [Tribolium castaneum]>gi|270001931|gb|EEZ98378.1| hypothetical protein TcasGA2_TC000837 [Tribolium castaneum]
Cluster-54524.62492	--	--
Cluster-54524.48501	--	--
Cluster-54524.113168	--	--
Cluster-54524.113163	--	--
Cluster-54524.113162	--	--
Cluster-54524.113167	XP_005095740.1	PREDICTED: uncharacterized protein LOC101853305 [Aplysia californica]
Cluster-54524.113166	XP_005095740.1	PREDICTED: uncharacterized protein LOC101853305 [Aplysia californica]
Cluster-54524.113164	--	--
Cluster-54524.118289	--	--
Cluster-54524.63364	--	--
Cluster-54524.63365	--	--
Cluster-54524.63366	--	--
Cluster-54524.63361	KKF28156.1	Protein FAM167A [Larimichthys crocea]>gi|808886005|gb|KKF32677.1| Protein FAM167A [Larimichthys crocea]
Cluster-54524.63362	--	--
Cluster-54524.142718	--	--
Cluster-3437.0	XP_001424058.1	hypothetical protein [Paramecium tetraurelia strain d4-2]>gi|124391120|emb|CAK56660.1| unnamed protein product [Paramecium tetraurelia]
Cluster-54524.34079	XP_005328014.1	PREDICTED: plasminogen receptor (KT) [Ictidomys tridecemlineatus]
Cluster-54524.34074	--	--
Cluster-54524.34076	XP_003096085.1	hypothetical protein CRE_04257 [Caenorhabditis remanei]>gi|308243581|gb|EFO87533.1| hypothetical protein CRE_04257 [Caenorhabditis remanei]
Cluster-54524.34073	--	--
Cluster-54524.121708	--	--
Cluster-54524.45821	--	--
Cluster-54524.119172	--	--
Cluster-54524.70656	--	--
Cluster-54524.119176	--	--
Cluster-54524.119177	--	--
Cluster-54524.119175	ABM54465.1	cuticle protein CB6 [Portunus pelagicus]
Cluster-54524.21948	--	--
Cluster-54524.111154	--	--
Cluster-54524.111155	XP_008556859.1	PREDICTED: neuropathy target esterase sws isoform X1 [Microplitis demolitor]
Cluster-54524.111156	--	--
Cluster-54524.111157	XP_012256622.1	PREDICTED: myosin-IIIb-like isoform X5 [Athalia rosae]
Cluster-54524.111152	--	--
Cluster-54524.111153	--	--
Cluster-54524.33316	--	--
Cluster-54524.33310	--	--
Cluster-54524.96291	XP_011562816.1	PREDICTED: nephrin-like [Plutella xylostella]
Cluster-54524.96292	XP_011502689.1	PREDICTED: neural cell adhesion molecule 1 [Ceratosolen solmsi marchali]
Cluster-54524.96293	XP_011502689.1	PREDICTED: neural cell adhesion molecule 1 [Ceratosolen solmsi marchali]
Cluster-54524.96294	XP_011562816.1	PREDICTED: nephrin-like [Plutella xylostella]
Cluster-54524.96295	XP_002592820.1	hypothetical protein BRAFLDRAFT_194454 [Branchiostoma floridae]>gi|229278044|gb|EEN48831.1| hypothetical protein BRAFLDRAFT_194454, partial [Branchiostoma floridae]
Cluster-54524.96296	EFX71405.1	hypothetical protein DAPPUDRAFT_327246 [Daphnia pulex]
Cluster-54524.98296	--	--
Cluster-54524.98297	XP_012250949.1	PREDICTED: serine/threonine-protein kinase Genghis Khan isoform X1 [Athalia rosae]>gi|817058925|ref|XP_012250950.1| PREDICTED: serine/threonine-protein kinase Genghis Khan isoform X1 [Athalia rosae]>gi|817058927|ref|XP_012250951.1| PREDICTED: serine/threonine-protein kinase Genghis Khan isoform X1 [Athalia rosae]
Cluster-54524.98290	--	--
Cluster-54524.98291	--	--
Cluster-54524.26625	--	--
Cluster-54524.122899	--	--
Cluster-54524.122898	--	--
Cluster-54524.80268	--	--
Cluster-54524.80266	XP_012169624.1	PREDICTED: atypical protein kinase C isoform X3 [Bombus terrestris]
Cluster-54524.122897	--	--
Cluster-54524.80263	KDR15614.1	Membrane-associated guanylate kinase, WW and PDZ domain-containing protein 2 [Zootermopsis nevadensis]
Cluster-54524.80260	KDR12280.1	hypothetical protein L798_13769 [Zootermopsis nevadensis]
Cluster-54524.80261	KDR12280.1	hypothetical protein L798_13769 [Zootermopsis nevadensis]
Cluster-54524.83455	--	--
Cluster-54524.115592	--	--
Cluster-54524.57209	--	--
Cluster-54524.116274	--	--
Cluster-54524.116276	KDR15814.1	Tether containing UBX domain for GLUT4 [Zootermopsis nevadensis]
Cluster-54524.116273	--	--
Cluster-54524.131145	--	--
Cluster-54524.131144	--	--
Cluster-54524.131146	--	--
Cluster-54524.44740	--	--
Cluster-54524.93992	--	--
Cluster-54524.102823	--	--
Cluster-54524.15204	XP_002608889.1	hypothetical protein BRAFLDRAFT_285738 [Branchiostoma floridae]>gi|229294243|gb|EEN64899.1| hypothetical protein BRAFLDRAFT_285738 [Branchiostoma floridae]
Cluster-54524.15202	--	--
Cluster-54524.15208	--	--
Cluster-54524.104986	--	--
Cluster-54524.104988	--	--
Cluster-54524.73301	--	--
Cluster-54524.93997	--	--
Cluster-54524.98883	--	--
Cluster-54524.98882	--	--
Cluster-54524.88764	EFX68926.1	hypothetical protein DAPPUDRAFT_329602 [Daphnia pulex]
Cluster-54524.98885	KDR23418.1	Endophilin-A [Zootermopsis nevadensis]
Cluster-54524.88763	--	--
Cluster-54524.98889	XP_008198660.1	PREDICTED: cytoplasmic dynein 1 intermediate chain isoform X1 [Tribolium castaneum]
Cluster-54524.133567	--	--
Cluster-54524.133566	--	--
Cluster-54524.133568	XP_012256567.1	PREDICTED: TBC1 domain family member 25 [Athalia rosae]
Cluster-54524.121564	--	--
Cluster-54524.59470	--	--
Cluster-54524.71912	--	--
Cluster-54524.83951	BAN59994.1	RNA binding protein Gbfne [Gryllus bimaculatus]>gi|520958096|dbj|BAN59995.1| RNA binding protein Gbfne [Gryllus bimaculatus]
Cluster-54524.59990	--	--
Cluster-54524.83954	--	--
Cluster-54524.59995	--	--
Cluster-54524.71918	--	--
Cluster-54524.86644	--	--
Cluster-54524.40471	XP_011348683.1	PREDICTED: uncharacterized protein LOC105285854 [Cerapachys biroi]>gi|759077813|ref|XP_011348684.1| PREDICTED: uncharacterized protein LOC105285854 [Cerapachys biroi]>gi|759077815|ref|XP_011348685.1| PREDICTED: uncharacterized protein LOC105285854 [Cerapachys biroi]>gi|607353378|gb|EZA48144.1| hypothetical protein X777_14326 [Cerapachys biroi]
Cluster-54524.89267	--	--
Cluster-54524.84639	--	--
Cluster-54524.84638	--	--
Cluster-54524.130031	--	--
Cluster-54524.130036	--	--
Cluster-54524.150925	--	--
Cluster-54524.150923	--	--
Cluster-54524.140675	--	--
Cluster-54524.140674	--	--
Cluster-54524.140672	--	--
Cluster-54524.140679	KFM82603.1	hypothetical protein X975_11956, partial [Stegodyphus mimosarum]
Cluster-54524.140678	KFM82603.1	hypothetical protein X975_11956, partial [Stegodyphus mimosarum]
Cluster-54524.10502	ELT93932.1	hypothetical protein CAPTEDRAFT_218839 [Capitella teleta]
Cluster-54524.69261	--	--
Cluster-54524.72995	--	--
Cluster-54524.87350	--	--
Cluster-74206.0	EFX83810.1	hypothetical protein DAPPUDRAFT_301637 [Daphnia pulex]
Cluster-54524.115891	XP_005102138.1	PREDICTED: SWI/SNF-related matrix-associated actin-dependent regulator of chromatin subfamily A-like protein 1 [Aplysia californica]
Cluster-54524.115893	--	--
Cluster-54524.115894	--	--
Cluster-54524.115896	EEZ99365.1	cadherin 96Ca [Tribolium castaneum]
Cluster-54524.115898	--	--
Cluster-54524.128943	--	--
Cluster-54524.128941	--	--
Cluster-54524.128940	--	--
Cluster-54524.128946	--	--
Cluster-54524.81942	--	--
Cluster-54524.81943	--	--
Cluster-54524.81945	--	--
Cluster-54524.81948	--	--
Cluster-54524.115338	--	--
Cluster-54524.43206	--	--
Cluster-54524.33885	--	--
Cluster-54524.33883	--	--
Cluster-54524.104794	--	--
Cluster-54524.104795	--	--
Cluster-54524.104790	EFX69653.1	hypothetical protein DAPPUDRAFT_202746 [Daphnia pulex]
Cluster-54524.104792	--	--
Cluster-54524.26709	--	--
Cluster-54524.112158	KFM56750.1	Pre-mRNA-splicing factor 38B, partial [Stegodyphus mimosarum]
Cluster-54524.112154	--	--
Cluster-54524.112150	--	--
Cluster-54524.62753	AEL23131.1	COX4 neighbor protein [Cherax quadricarinatus]
Cluster-54524.103229	EFX78769.1	hypothetical protein DAPPUDRAFT_319998 [Daphnia pulex]
Cluster-54524.103225	XP_008208863.1	PREDICTED: NEDD4 family-interacting protein 1-like isoform X2 [Nasonia vitripennis]
Cluster-54524.103224	--	--
Cluster-54524.103226	XP_001845189.1	conserved hypothetical protein [Culex quinquefasciatus]>gi|167876060|gb|EDS39443.1| conserved hypothetical protein [Culex quinquefasciatus]
Cluster-54524.103220	--	--
Cluster-54524.103223	--	--
Cluster-54524.103222	EFX70793.1	hypothetical protein DAPPUDRAFT_309287 [Daphnia pulex]
Cluster-76135.0	EFX69067.1	hypothetical protein DAPPUDRAFT_301173 [Daphnia pulex]
Cluster-54524.121485	XP_008191687.1	PREDICTED: tyrosine-protein kinase Btk29A isoform X1 [Tribolium castaneum]>gi|270005708|gb|EFA02156.1| hypothetical protein TcasGA2_TC007809 [Tribolium castaneum]
Cluster-54524.132968	AEB54626.1	ctf8 [Procambarus clarkii]
Cluster-54524.65326	--	--
Cluster-54524.88183	--	--
Cluster-54524.116709	--	--
Cluster-54524.116705	KDR16774.1	HMG box-containing protein 1 [Zootermopsis nevadensis]
Cluster-54524.116701	--	--
Cluster-54524.116702	KDR19796.1	hypothetical protein L798_04728 [Zootermopsis nevadensis]
Cluster-16589.2	--	--
Cluster-54524.121486	XP_008203445.1	PREDICTED: tyrosine-protein kinase Btk29A isoform X5 [Nasonia vitripennis]
Cluster-54524.156200	--	--
Cluster-54524.20930	--	--
Cluster-54524.20933	XP_012946092.1	PREDICTED: uncharacterized protein LOC106013864 [Aplysia californica]
Cluster-54524.121480	--	--
Cluster-54524.67550	--	--
Cluster-74435.0	--	--
Cluster-54524.93570	--	--
Cluster-54524.91698	--	--
Cluster-54524.62805	--	--
Cluster-54524.91691	--	--
Cluster-54524.91690	--	--
Cluster-54524.91694	--	--
Cluster-54524.91697	KMQ98198.1	long-chain-fatty-acid-- ligase 3 [Lasius niger]
Cluster-54524.121482	XP_002433360.1	nhl repeat-containing protein, putative [Ixodes scapularis]>gi|215490783|gb|EEC00424.1| nhl repeat-containing protein, putative [Ixodes scapularis]
Cluster-54524.15778	--	--
Cluster-54524.66596	--	--
Cluster-54524.66592	--	--
Cluster-54524.66593	--	--
Cluster-54524.14428	EFX78839.1	hypothetical protein DAPPUDRAFT_320145 [Daphnia pulex]
Cluster-54524.14425	--	--
Cluster-54524.99046	--	--
Cluster-54524.99047	--	--
Cluster-54524.99040	ABN51213.1	cytoplasmic carbonic anydrase [Callinectes sapidus]
Cluster-54524.99041	EFX74357.1	sodium-dependent phosphate transporter [Daphnia pulex]
Cluster-54524.99042	--	--
Cluster-54524.99048	XP_004922292.1	PREDICTED: lachesin-like isoform X2 [Bombyx mori]
Cluster-54524.99049	XP_004922292.1	PREDICTED: lachesin-like isoform X2 [Bombyx mori]
Cluster-54524.87014	XP_001605379.1	PREDICTED: bax inhibitor 1 isoform X1 [Nasonia vitripennis]
Cluster-54524.87015	--	--
Cluster-54524.87016	--	--
Cluster-54524.87017	--	--
Cluster-54524.87011	--	--
Cluster-54524.87018	--	--
Cluster-54524.98318	KDR22826.1	Smaug-like protein 2 [Zootermopsis nevadensis]
Cluster-54524.98313	--	--
Cluster-54524.98312	XP_007554691.1	PREDICTED: uncharacterized protein LOC103139799 [Poecilia formosa]
Cluster-54524.98311	--	--
Cluster-54524.98310	--	--
Cluster-54524.98316	--	--
Cluster-54524.98314	--	--
Cluster-54524.88639	--	--
Cluster-54524.89663	--	--
Cluster-54524.93791	EFN70976.1	UNC93-like protein [Camponotus floridanus]
Cluster-54524.132195	--	--
Cluster-54524.132194	--	--
Cluster-54524.80542	KDR17158.1	Transport and Golgi organization protein 11 [Zootermopsis nevadensis]
Cluster-54524.80540	XP_008201177.1	PREDICTED: microtubule-associated protein tau isoform X3 [Tribolium castaneum]
Cluster-54524.80546	--	--
Cluster-54524.80544	XP_006559941.1	PREDICTED: endophilin-A isoform X12 [Apis mellifera]
Cluster-54524.129374	--	--
Cluster-54524.130138	--	--
Cluster-54524.16149	--	--
Cluster-54524.65958	--	--
Cluster-54524.121102	--	--
Cluster-54524.2209	--	--
Cluster-54524.65950	--	--
Cluster-54524.73736	XP_011496078.1	PREDICTED: glutaminase kidney isoform, mitochondrial [Ceratosolen solmsi marchali]
Cluster-54524.73733	--	--
Cluster-54524.73730	XP_011679369.1	PREDICTED: uncharacterized protein LOC100888239 [Strongylocentrotus purpuratus]
Cluster-54524.131260	XP_973062.1	PREDICTED: ER degradation-enhancing alpha-mannosidase-like protein 2 [Tribolium castaneum]>gi|270005396|gb|EFA01844.1| hypothetical protein TcasGA2_TC007447 [Tribolium castaneum]
Cluster-54524.69108	--	--
Cluster-54524.69106	--	--
Cluster-54524.69107	--	--
Cluster-54524.69103	--	--
Cluster-70724.0	KHN70979.1	Beta-amyloid-like protein [Toxocara canis]
Cluster-54524.72461	XP_002430060.1	conserved hypothetical protein [Pediculus humanus corporis]>gi|212515130|gb|EEB17322.1| conserved hypothetical protein [Pediculus humanus corporis]
Cluster-54524.72463	ETN60077.1	estrogen sulfotransferase [Anopheles darlingi]
Cluster-54524.115708	--	--
Cluster-54524.86120	EFA12051.1	hypothetical protein TcasGA2_TC001468 [Tribolium castaneum]
Cluster-54524.86127	KDR11140.1	Chitobiosyldiphosphodolichol beta-mannosyltransferase [Zootermopsis nevadensis]
Cluster-54524.86126	--	--
Cluster-54524.115701	--	--
Cluster-54524.115703	--	--
Cluster-54524.115705	XP_012234455.1	PREDICTED: uncharacterized protein LOC105679160 isoform X2 [Linepithema humile]>gi|815826149|ref|XP_012234456.1| PREDICTED: uncharacterized protein LOC105679160 isoform X2 [Linepithema humile]
Cluster-54524.118085	--	--
Cluster-54524.118086	--	--
Cluster-54524.118081	XP_011137765.1	PREDICTED: lethal(2)neighbour of Tid protein [Harpegnathos saltator]>gi|307207923|gb|EFN85482.1| Lethal(2)neighbour of tid protein [Harpegnathos saltator]
Cluster-54524.118089	KDR15813.1	SGT1-like protein ecdysoneless [Zootermopsis nevadensis]
Cluster-54524.118088	--	--
Cluster-54524.100026	--	--
Cluster-54524.43092	--	--
Cluster-54524.82929	--	--
Cluster-54524.82927	XP_002742436.1	PREDICTED: trans-1,2-dihydrobenzene-1,2-diol dehydrogenase-like [Saccoglossus kowalevskii]
Cluster-54524.82923	XP_002430116.1	conserved hypothetical protein [Pediculus humanus corporis]>gi|212515197|gb|EEB17378.1| conserved hypothetical protein [Pediculus humanus corporis]
Cluster-54524.82922	--	--
Cluster-54524.82921	XP_002408392.1	Zfhx4 protein, putative [Ixodes scapularis]>gi|215497331|gb|EEC06825.1| Zfhx4 protein, putative [Ixodes scapularis]
Cluster-54524.123458	--	--
Cluster-54524.123453	--	--
Cluster-54524.123454	--	--
Cluster-54524.123455	--	--
Cluster-54524.123456	--	--
Cluster-54524.76619	--	--
Cluster-54524.76614	--	--
Cluster-54524.76612	XP_012153866.1	PREDICTED: LOW QUALITY PROTEIN: teneurin-m [Megachile rotundata]
Cluster-54524.76613	--	--
Cluster-54524.59818	--	--
Cluster-54524.59812	XP_011446282.1	PREDICTED: dCTP pyrophosphatase 1-like [Crassostrea gigas]
Cluster-54524.59811	EFX86848.1	hypothetical protein DAPPUDRAFT_221694 [Daphnia pulex]
Cluster-54524.59810	--	--
Cluster-54524.119217	--	--
Cluster-54524.99647	--	--
Cluster-54524.153682	--	--
Cluster-54524.133242	AEI88102.1	endonuclease-reverse transcriptase-like protein [Scylla paramamosain]
Cluster-54524.88791	--	--
Cluster-54524.88797	--	--
Cluster-54524.19836	--	--
Cluster-54524.71348	--	--
Cluster-54524.71347	--	--
Cluster-54524.71346	--	--
Cluster-54524.71341	--	--
Cluster-54524.31588	--	--
Cluster-54524.31586	--	--
Cluster-54524.102047	AEE63192.1	unknown [Dendroctonus ponderosae]>gi|478259673|gb|ENN79517.1| hypothetical protein YQE_03980, partial [Dendroctonus ponderosae]>gi|546682944|gb|ERL92823.1| hypothetical protein D910_10131 [Dendroctonus ponderosae]
Cluster-54524.102044	XP_005181223.1	PREDICTED: neurexin-4 isoform X1 [Musca domestica]>gi|557763022|ref|XP_005181224.1| PREDICTED: neurexin-4 isoform X1 [Musca domestica]>gi|755868356|ref|XP_011291545.1| PREDICTED: neurexin-4 isoform X1 [Musca domestica]
Cluster-54524.102045	ABQ63087.1	hypoxia-inducible factor-1alpha [Callinectes sapidus]
Cluster-54524.102042	ELU17821.1	hypothetical protein CAPTEDRAFT_153312 [Capitella teleta]
Cluster-54524.102048	--	--
Cluster-54524.34401	--	--
Cluster-54524.34407	ACC86854.1	C-type lectin-like domain-containing protein PtLP [Portunus trituberculatus]
Cluster-54524.34406	ACC86854.1	C-type lectin-like domain-containing protein PtLP [Portunus trituberculatus]
Cluster-54524.99649	--	--
Cluster-54524.101537	--	--
Cluster-54524.101536	KDR16423.1	Seryl-tRNA synthetase, mitochondrial [Zootermopsis nevadensis]
Cluster-54524.101535	XP_003221988.1	PREDICTED: Krueppel-like factor 6 [Anolis carolinensis]
Cluster-54524.101531	EFX73045.1	hypothetical protein DAPPUDRAFT_188919 [Daphnia pulex]
Cluster-54524.101530	KDR17240.1	GRAM domain-containing protein 1B [Zootermopsis nevadensis]
Cluster-54524.47659	--	--
Cluster-54524.47655	--	--
Cluster-54524.30236	XP_011059037.1	PREDICTED: 1-acyl-sn-glycerol-3-phosphate acyltransferase alpha [Acromyrmex echinatior]>gi|332022456|gb|EGI62764.1| 1-acyl-sn-glycerol-3-phosphate acyltransferase alpha [Acromyrmex echinatior]
Cluster-54524.75338	--	--
Cluster-54524.75339	--	--
Cluster-54524.28280	--	--
Cluster-54524.129972	XP_012942460.1	PREDICTED: centrosomal protein of 78 kDa-like, partial [Aplysia californica]
Cluster-54524.25187	--	--
Cluster-54524.105326	KDR10442.1	PC4 and SFRS1-interacting protein [Zootermopsis nevadensis]
Cluster-54524.105324	--	--
Cluster-54524.105322	XP_008207992.1	PREDICTED: LOW QUALITY PROTEIN: Down syndrome cell adhesion molecule-like protein Dscam2 [Nasonia vitripennis]
Cluster-54524.105320	XP_011661022.1	PREDICTED: zinc transporter ZIP3-like [Strongylocentrotus purpuratus]
Cluster-54524.105321	XP_011503159.1	PREDICTED: delta-sarcoglycan-like [Ceratosolen solmsi marchali]
Cluster-54524.105328	XP_971720.1	PREDICTED: estradiol 17-beta-dehydrogenase 12 [Tribolium castaneum]>gi|270014405|gb|EFA10853.1| hypothetical protein TcasGA2_TC001630 [Tribolium castaneum]
Cluster-54524.105329	Q26473.1	RecName: Full=Semaphorin-1A; AltName: Full=Fasciclin IV; AltName: Full=Fasciclin-4; AltName: Full=Semaphorin-I; Short=Sema I; Flags: Precursor>gi|160845|gb|AAA29808.1| fasciclin IV [Schistocerca americana]
Cluster-54524.111586	XP_012162158.1	PREDICTED: protein lifeguard 1-like isoform X2 [Ceratitis capitata]
Cluster-54524.111584	--	--
Cluster-54524.111581	KFM61669.1	Msx2-interacting protein, partial [Stegodyphus mimosarum]
Cluster-54524.111588	--	--
Cluster-54524.119352	EFN64830.1	Growth arrest-specific protein 2 [Camponotus floridanus]
Cluster-54524.119353	--	--
Cluster-54524.119350	XP_012549963.1	PREDICTED: neural-cadherin isoform X4 [Bombyx mori]
Cluster-54524.119354	--	--
Cluster-54524.119355	--	--
Cluster-54524.119358	KDR13955.1	RAS and EF-hand domain-containing protein [Zootermopsis nevadensis]
Cluster-54524.119359	KDR13955.1	RAS and EF-hand domain-containing protein [Zootermopsis nevadensis]
Cluster-54524.96338	--	--
Cluster-54524.104057	--	--
Cluster-54524.104055	--	--
Cluster-54524.104052	XP_002413938.1	low-density lipoprotein receptor, putative [Ixodes scapularis]>gi|215507792|gb|EEC17246.1| low-density lipoprotein receptor, putative, partial [Ixodes scapularis]
Cluster-54524.104051	XP_002413938.1	low-density lipoprotein receptor, putative [Ixodes scapularis]>gi|215507792|gb|EEC17246.1| low-density lipoprotein receptor, putative, partial [Ixodes scapularis]
Cluster-54524.104050	--	--
Cluster-54524.32496	--	--
Cluster-54524.153456	--	--
Cluster-54524.88500	--	--
Cluster-54524.85192	XP_005142584.1	PREDICTED: mucosa-associated lymphoid tissue lymphoma translocation protein 1-like [Melopsittacus undulatus]
Cluster-54524.53562	--	--
Cluster-54524.16364	--	--
Cluster-54524.16365	CDS27922.1	expressed protein [Hymenolepis microstoma]
Cluster-54524.16367	--	--
Cluster-54524.16360	--	--
Cluster-54524.154105	--	--
Cluster-54524.154106	XP_012169160.1	PREDICTED: calcitonin receptor-like isoform X4 [Bombus terrestris]
Cluster-54524.154100	--	--
Cluster-54524.56307	--	--
Cluster-54524.65730	XP_008164525.1	PREDICTED: regulator of G-protein signaling 10 isoform X3 [Chrysemys picta bellii]
Cluster-54524.65732	XP_008164525.1	PREDICTED: regulator of G-protein signaling 10 isoform X3 [Chrysemys picta bellii]
Cluster-54524.65735	--	--
Cluster-54524.65739	AFA42360.1	clip domain serine proteinase 2 [Portunus trituberculatus]
Cluster-54524.92067	Q867W1.1	RecName: Full=FMRFamide-related neuropeptides; Contains: RecName: Full=GYRKPPFNGSIF-amide; Short=SIFamide; Contains: RecName: Full=C-terminal peptide; Flags: Precursor [Procambarus clarkii]>gi|27922975|dbj|BAC55939.1| neuropeptide precursor protein [Procambarus clarkii]>gi|27922977|dbj|BAC55940.1| neuropeptide precursor protein [Procambarus clarkii]
Cluster-54524.92066	KFM82690.1	Tumor protein D54, partial [Stegodyphus mimosarum]
Cluster-54524.92064	XP_008190309.1	PREDICTED: uncharacterized protein LOC662983 isoform X3 [Tribolium castaneum]
Cluster-54524.92063	--	--
Cluster-54524.92062	--	--
Cluster-54524.92060	--	--
Cluster-54524.92069	KDR13119.1	Protein TANC2 [Zootermopsis nevadensis]
Cluster-54524.66630	--	--
Cluster-54524.135762	--	--
Cluster-54524.127374	--	--
Cluster-54524.127376	--	--
Cluster-54524.15632	AAW25139.1	SJCHGC03910 protein [Schistosoma japonicum]
Cluster-54524.15631	XP_012174953.1	PREDICTED: coatomer subunit beta' isoform X1 [Bombus terrestris]>gi|808147792|ref|XP_012174954.1| PREDICTED: coatomer subunit beta' isoform X1 [Bombus terrestris]
Cluster-54524.120840	--	--
Cluster-54524.120841	XP_002434765.1	calcium release-activated calcium channel protein, putative [Ixodes scapularis]>gi|215498095|gb|EEC07589.1| calcium release-activated calcium channel protein, putative [Ixodes scapularis]
Cluster-54524.120846	KDR12089.1	Protein cappuccino [Zootermopsis nevadensis]
Cluster-54524.120847	--	--
Cluster-54524.3069	--	--
Cluster-54524.86243	KDR09197.1	Cytoplasmic FMR1-interacting protein [Zootermopsis nevadensis]
Cluster-54524.86247	XP_001603808.1	PREDICTED: uncharacterized protein C05D11.1-like [Nasonia vitripennis]
Cluster-54524.86245	XP_004519567.1	PREDICTED: cysteine-rich hydrophobic domain-containing protein 2 [Ceratitis capitata]>gi|498933139|ref|XP_004519568.1| PREDICTED: cysteine-rich hydrophobic domain-containing protein 2 [Ceratitis capitata]
Cluster-54524.86248	--	--
Cluster-54524.86249	--	--
Cluster-54524.136212	XP_001011147.2	zinc-binding dehydrogenase family oxidoreductase [Tetrahymena thermophila SB210]>gi|146146100|gb|EAR90902.2| zinc-binding dehydrogenase family oxidoreductase [Tetrahymena thermophila SB210]
Cluster-54524.126024	--	--
Cluster-54524.126025	--	--
Cluster-54524.60022	--	--
Cluster-54524.66410	--	--
Cluster-54524.66413	XP_012027509.1	PREDICTED: uncharacterized protein LOC105614042 [Ovis aries musimon]
Cluster-46874.0	--	--
Cluster-54524.87191	--	--
Cluster-54524.90681	--	--
Cluster-54524.90680	XP_011671023.1	PREDICTED: voltage-dependent calcium channel subunit alpha-2/delta-1-like isoform X5 [Strongylocentrotus purpuratus]
Cluster-54524.90683	ABG82027.1	anti-lipopolysaccharide factor [Eriocheir sinensis]
Cluster-54524.87196	--	--
Cluster-54524.87198	--	--
Cluster-54524.90689	XP_012876408.1	PREDICTED: phosphate carrier protein, mitochondrial [Dipodomys ordii]>gi|852729088|ref|XP_012876417.1| PREDICTED: phosphate carrier protein, mitochondrial [Dipodomys ordii]
Cluster-54524.90688	XP_004933015.1	PREDICTED: upstream activation factor subunit spp27 [Bombyx mori]
Cluster-54524.4309	XP_002432030.1	hypothetical protein Phum_PHUM565670 [Pediculus humanus corporis]>gi|212517388|gb|EEB19292.1| hypothetical protein Phum_PHUM565670 [Pediculus humanus corporis]
Cluster-54524.132016	--	--
Cluster-54524.132019	--	--
Cluster-54524.93705	XP_012552665.1	PREDICTED: ankyrin repeat and SAM domain-containing protein 1A isoform X3 [Bombyx mori]
Cluster-54524.93704	--	--
Cluster-54524.93707	--	--
Cluster-54524.92856	XP_009014146.1	hypothetical protein HELRODRAFT_75835 [Helobdella robusta]>gi|555704302|gb|ESO07535.1| hypothetical protein HELRODRAFT_75835 [Helobdella robusta]
Cluster-54524.92857	KDR24110.1	T-complex protein 1 subunit epsilon [Zootermopsis nevadensis]
Cluster-54524.92854	--	--
Cluster-54524.92855	XP_009014146.1	hypothetical protein HELRODRAFT_75835 [Helobdella robusta]>gi|555704302|gb|ESO07535.1| hypothetical protein HELRODRAFT_75835 [Helobdella robusta]
Cluster-54524.92853	--	--
Cluster-54524.92851	KDR06880.1	NADH dehydrogenase [ubiquinone] 1 beta subcomplex subunit 8, mitochondrial [Zootermopsis nevadensis]
Cluster-54524.92858	BAD91056.1	Cj-cadherin [Caridina japonica]
Cluster-54524.92859	ERL89435.1	hypothetical protein D910_06802 [Dendroctonus ponderosae]
Cluster-54524.57501	XP_011697619.1	PREDICTED: probable Ras GTPase-activating protein isoform X2 [Wasmannia auropunctata]
Cluster-54524.93702	KGL86658.1	Alpha- and gamma-adaptin-binding protein p34, partial [Charadrius vociferus]
Cluster-54524.78139	--	--
Cluster-54524.78130	XP_002610453.1	hypothetical protein BRAFLDRAFT_124267 [Branchiostoma floridae]>gi|229295819|gb|EEN66463.1| hypothetical protein BRAFLDRAFT_124267 [Branchiostoma floridae]
Cluster-54524.40824	XP_004032540.1	ras oncogene family protein, putative [Ichthyophthirius multifiliis]>gi|340504518|gb|EGR30953.1| ras oncogene family protein, putative [Ichthyophthirius multifiliis]
Cluster-54524.54844	--	--
Cluster-54524.54842	--	--
Cluster-54524.113243	--	--
Cluster-54524.97981	--	--
Cluster-54524.70321	--	--
Cluster-54524.101052	--	--
Cluster-54524.113241	--	--
Cluster-54524.95112	--	--
Cluster-54524.73679	XP_011687736.1	PREDICTED: LOW QUALITY PROTEIN: kinesin-like protein KIF13B [Wasmannia auropunctata]
Cluster-54524.73677	EFX85809.1	hypothetical protein DAPPUDRAFT_309094 [Daphnia pulex]
Cluster-54524.73676	XP_012350431.1	PREDICTED: protein tramtrack, beta isoform-like, partial [Apis florea]
Cluster-54524.73674	--	--
Cluster-54524.70973	--	--
Cluster-54524.95117	--	--
Cluster-54524.100178	XP_008199246.1	PREDICTED: disco-interacting protein 2 isoform X7 [Tribolium castaneum]
Cluster-54524.100179	EFX85769.1	hypothetical protein DAPPUDRAFT_313551 [Daphnia pulex]
Cluster-54524.38349	XP_007660311.1	PREDICTED: protein CBFA2T3-like, partial [Ornithorhynchus anatinus]
Cluster-54524.100172	--	--
Cluster-54524.74376	XP_009056737.1	hypothetical protein LOTGIDRAFT_233044 [Lottia gigantea]>gi|556103944|gb|ESO92596.1| hypothetical protein LOTGIDRAFT_233044 [Lottia gigantea]
Cluster-54524.74375	XP_009056737.1	hypothetical protein LOTGIDRAFT_233044 [Lottia gigantea]>gi|556103944|gb|ESO92596.1| hypothetical protein LOTGIDRAFT_233044 [Lottia gigantea]
Cluster-54524.74374	XP_009056737.1	hypothetical protein LOTGIDRAFT_233044 [Lottia gigantea]>gi|556103944|gb|ESO92596.1| hypothetical protein LOTGIDRAFT_233044 [Lottia gigantea]
Cluster-54524.74373	XP_011453780.1	PREDICTED: dihydropyrimidine dehydrogenase [NADP(+)]-like, partial [Crassostrea gigas]
Cluster-54524.74372	EFX69334.1	hypothetical protein DAPPUDRAFT_300985 [Daphnia pulex]
Cluster-54524.56352	--	--
Cluster-54524.108342	--	--
Cluster-54524.108340	EJY66653.1	hypothetical protein OXYTRI_13058 [Oxytricha trifallax]
Cluster-54524.85517	--	--
Cluster-54524.3178	--	--
Cluster-54524.19883	--	--
Cluster-54524.118328	EFX75490.1	hypothetical protein DAPPUDRAFT_306744 [Daphnia pulex]
Cluster-54524.118329	EFX75490.1	hypothetical protein DAPPUDRAFT_306744 [Daphnia pulex]
Cluster-54524.118320	--	--
Cluster-54524.118323	--	--
Cluster-54524.118326	KDR16600.1	Monocyte to macrophage differentiation factor 2 [Zootermopsis nevadensis]
Cluster-54524.118327	--	--
Cluster-54524.85341	--	--
Cluster-54524.92554	--	--
Cluster-54524.44928	XP_002606957.1	hypothetical protein BRAFLDRAFT_113584 [Branchiostoma floridae]>gi|229292303|gb|EEN62967.1| hypothetical protein BRAFLDRAFT_113584, partial [Branchiostoma floridae]
Cluster-54524.144047	--	--
Cluster-54524.97134	--	--
Cluster-54524.127102	XP_002429451.1	mitogen-activated protein kinase kinase kinase 7-interacting protein, putative [Pediculus humanus corporis]>gi|212514383|gb|EEB16713.1| mitogen-activated protein kinase kinase kinase 7-interacting protein, putative [Pediculus humanus corporis]
Cluster-54524.92551	XP_001991287.1	GH12136 [Drosophila grimshawi]>gi|193901045|gb|EDV99911.1| GH12136 [Drosophila grimshawi]
Cluster-54524.127103	--	--
Cluster-54524.89124	ACC97407.1	gastrolith protein [Cherax quadricarinatus]
Cluster-54524.89125	XP_012251366.1	PREDICTED: uncharacterized protein LOC105683393 isoform X3 [Athalia rosae]
Cluster-54524.89122	--	--
Cluster-54524.89123	--	--
Cluster-54524.89120	KDR15408.1	Protocadherin-15, partial [Zootermopsis nevadensis]
Cluster-54524.89121	--	--
Cluster-54524.60686	KFM73468.1	Heparan sulfate glucosamine 3-O-sulfotransferase 5, partial [Stegodyphus mimosarum]
Cluster-54524.89128	--	--
Cluster-54524.89129	KDR20994.1	Receptor-type tyrosine-protein phosphatase N2 [Zootermopsis nevadensis]
Cluster-74754.0	--	--
Cluster-54524.127108	KDR08505.1	hypothetical protein L798_01963 [Zootermopsis nevadensis]
Cluster-54524.31423	XP_011198137.1	PREDICTED: uncharacterized protein LOC105222487 isoform X2 [Bactrocera dorsalis]
Cluster-54524.46401	--	--
Cluster-54524.65289	--	--
Cluster-54524.65283	XP_012259901.1	PREDICTED: phosphatidylinositol 4-phosphate 5-kinase type-1 alpha-like isoform X7 [Athalia rosae]
Cluster-54524.65285	XP_012054515.1	PREDICTED: eukaryotic translation initiation factor 2-alpha kinase 4 [Atta cephalotes]
Cluster-54524.39635	XP_002612201.1	hypothetical protein BRAFLDRAFT_115143 [Branchiostoma floridae]>gi|229297575|gb|EEN68210.1| hypothetical protein BRAFLDRAFT_115143 [Branchiostoma floridae]
Cluster-54524.39632	--	--
Cluster-54524.67947	--	--
Cluster-54524.93271	XP_008202921.1	PREDICTED: alpha-aminoadipic semialdehyde synthase, mitochondrial isoform X2 [Nasonia vitripennis]
Cluster-54524.117881	--	--
Cluster-54524.117882	--	--
Cluster-54524.117884	--	--
Cluster-54524.117886	--	--
Cluster-54524.93276	--	--
Cluster-54524.60636	--	--
Cluster-54524.127223	KDR21224.1	Oligopeptidase A [Zootermopsis nevadensis]
Cluster-54524.61371	--	--
Cluster-54524.73888	--	--
Cluster-54524.47754	--	--
Cluster-54524.127220	--	--
Cluster-54524.3303	KDR21567.1	Leucine-rich repeat neuronal protein 2 [Zootermopsis nevadensis]
Cluster-54524.18765	--	--
Cluster-54524.14870	--	--
Cluster-54524.14876	--	--
Cluster-54524.14875	XP_008179266.1	PREDICTED: general transcription factor II-I repeat domain-containing protein 2A-like [Acyrthosiphon pisum]
Cluster-54524.137014	XP_002432627.1	ubiquitin carboxyl-terminal hydrolase, putative [Pediculus humanus corporis]>gi|212518097|gb|EEB19889.1| ubiquitin carboxyl-terminal hydrolase, putative [Pediculus humanus corporis]
Cluster-54524.66169	--	--
Cluster-54524.66168	XP_011645908.1	PREDICTED: neuron navigator 3-like [Pogonomyrmex barbatus]
Cluster-54524.112845	XP_006620595.1	PREDICTED: sorbin and SH3 domain-containing protein 2-like isoform X26 [Apis dorsata]
Cluster-54524.8462	--	--
Cluster-54524.4895	--	--
Cluster-54524.119351	EFN83568.1	Growth arrest-specific protein 2 [Harpegnathos saltator]
Cluster-54524.4898	--	--
Cluster-54524.4899	--	--
Cluster-59223.1	--	--
Cluster-54524.17752	NP_001167084.1	ras-related protein Rab-8A [Salmo salar]>gi|223648024|gb|ACN10770.1| Ras-related protein Rab-8A [Salmo salar]
Cluster-54524.17756	XP_005108123.1	PREDICTED: DNA replication licensing factor mcm2-like [Aplysia californica]
Cluster-54524.17757	--	--
Cluster-54524.149914	--	--
Cluster-54524.149916	--	--
Cluster-54524.149911	--	--
Cluster-54524.149910	XP_008987197.1	PREDICTED: thymosin beta-4 [Callithrix jacchus]
Cluster-54524.96679	--	--
Cluster-54524.125891	--	--
Cluster-54524.125895	--	--
Cluster-54524.50723	--	--
Cluster-54524.50725	--	--
Cluster-54524.126277	--	--
Cluster-54524.84405	--	--
Cluster-54524.126275	--	--
Cluster-77350.0	XP_001617468.1	hypothetical protein NEMVEDRAFT_v1g226054 [Nematostella vectensis]>gi|156318663|ref|XP_001618091.1| hypothetical protein NEMVEDRAFT_v1g155792 [Nematostella vectensis]>gi|156335452|ref|XP_001619587.1| hypothetical protein NEMVEDRAFT_v1g150890 [Nematostella vectensis]>gi|156193992|gb|EDO25368.1| predicted protein [Nematostella vectensis]>gi|156197368|gb|EDO25991.1| predicted protein [Nematostella v…
Cluster-54524.96661	--	--
Cluster-54524.84408	KDR13293.1	Brain-specific angiogenesis inhibitor 1 [Zootermopsis nevadensis]
Cluster-54524.96660	XP_008302962.1	PREDICTED: LOW QUALITY PROTEIN: trifunctional purine biosynthetic protein adenosine-3 [Stegastes partitus]
Cluster-60737.0	XP_009030788.1	hypothetical protein HELRODRAFT_90460 [Helobdella robusta]>gi|555687868|gb|ESN91100.1| hypothetical protein HELRODRAFT_90460 [Helobdella robusta]
Cluster-54524.124760	XP_005112306.1	PREDICTED: mitochondrial sodium/hydrogen exchanger 9B2-like isoform X1 [Aplysia californica]>gi|871274609|ref|XP_012945769.1| PREDICTED: mitochondrial sodium/hydrogen exchanger 9B2-like isoform X1 [Aplysia californica]
Cluster-54524.90968	XP_012678574.1	PREDICTED: xylose isomerase-like isoform X2 [Clupea harengus]
Cluster-54524.90964	--	--
Cluster-54524.90965	XP_005181545.1	PREDICTED: uncharacterized protein LOC101889976 [Musca domestica]>gi|755869310|ref|XP_011291669.1| PREDICTED: uncharacterized protein LOC101889976 [Musca domestica]
Cluster-54524.90967	XP_002407743.1	conserved hypothetical protein [Ixodes scapularis]>gi|215492257|gb|EEC01898.1| conserved hypothetical protein, partial [Ixodes scapularis]
Cluster-54524.90960	XP_008191654.1	PREDICTED: apoptosis-resistant E3 ubiquitin protein ligase 1 isoform X1 [Tribolium castaneum]
Cluster-54524.90961	EFX62153.1	hypothetical protein DAPPUDRAFT_120473 [Daphnia pulex]
Cluster-54524.90962	--	--
Cluster-54524.60135	--	--
Cluster-54524.96671	--	--
Cluster-54524.92188	--	--
Cluster-54524.92184	XP_971123.1	PREDICTED: protein FAM98A [Tribolium castaneum]>gi|270014941|gb|EFA11389.1| hypothetical protein TcasGA2_TC011549 [Tribolium castaneum]
Cluster-54524.92186	KDR14469.1	Neurabin-1 [Zootermopsis nevadensis]
Cluster-54524.92181	XP_001311071.1	ankyrin repeat protein [Trichomonas vaginalis G3]>gi|121892867|gb|EAX98141.1| ankyrin repeat protein, putative [Trichomonas vaginalis G3]
Cluster-54524.92182	--	--
Cluster-54524.92183	AFJ11397.2	prostaglandin F synthase [Penaeus monodon]
Cluster-54524.97609	XP_006561117.1	PREDICTED: nephrin isoform X1 [Apis mellifera]
Cluster-54524.134534	XP_008773895.1	PREDICTED: collagen alpha-2(I) chain isoform X1 [Rattus norvegicus]
Cluster-54524.52684	--	--
Cluster-54524.123802	XP_005110410.1	PREDICTED: zinc finger MYND domain-containing protein 10-like [Aplysia californica]
Cluster-54524.123804	--	--
Cluster-73705.0	ABW97364.1	chloroplast ribulose-1,5-bisphosphate carboxylase/oxygenase small subunit 2 [Amorphochlora amoebiformis]
Cluster-7988.2	ACO10768.1	Haloalkane dehalogenase [Caligus rogercresseyi]
Cluster-54524.84637	--	--
Cluster-54524.93047	--	--
Cluster-54524.106886	XP_008198129.1	PREDICTED: CUGBP Elav-like family member 4 [Tribolium castaneum]
Cluster-54524.106887	--	--
Cluster-54524.106884	XP_969753.1	PREDICTED: xylulose kinase [Tribolium castaneum]>gi|270002483|gb|EEZ98930.1| hypothetical protein TcasGA2_TC004550 [Tribolium castaneum]
Cluster-54524.89585	--	--
Cluster-54524.106888	XP_008198129.1	PREDICTED: CUGBP Elav-like family member 4 [Tribolium castaneum]
Cluster-54524.102411	--	--
Cluster-54524.102417	--	--
Cluster-54524.102416	XP_011691978.1	PREDICTED: heterogeneous nuclear ribonucleoprotein R isoform X3 [Wasmannia auropunctata]
Cluster-54524.99392	--	--
Cluster-54524.92953	KFM71373.1	Neuroglian, partial [Stegodyphus mimosarum]
Cluster-54524.92952	KFM71373.1	Neuroglian, partial [Stegodyphus mimosarum]
Cluster-54524.92951	XP_011307617.1	PREDICTED: neuroglian isoform X1 [Fopius arisanus]
Cluster-54524.92950	XP_011255605.1	PREDICTED: neuroglian isoform X4 [Camponotus floridanus]
Cluster-54524.92957	--	--
Cluster-54524.92956	--	--
Cluster-54524.89498	AEP17493.1	copper/zinc superoxide dismutase [Eriocheir sinensis]
Cluster-54524.89499	--	--
Cluster-54524.89497	XP_011158478.1	PREDICTED: RING finger protein unkempt isoform X6 [Solenopsis invicta]
Cluster-54524.89494	--	--
Cluster-54524.89495	--	--
Cluster-54524.89492	XP_967505.1	PREDICTED: otopetrin-2 isoform X2 [Tribolium castaneum]>gi|270005880|gb|EFA02328.1| hypothetical protein TcasGA2_TC007996 [Tribolium castaneum]
Cluster-54524.89493	--	--
Cluster-54524.89490	--	--
Cluster-54524.96200	--	--
Cluster-54524.91321	XP_009066241.1	hypothetical protein LOTGIDRAFT_223003 [Lottia gigantea]>gi|556094406|gb|ESO83059.1| hypothetical protein LOTGIDRAFT_223003 [Lottia gigantea]
Cluster-54524.101143	--	--
Cluster-54524.101147	--	--
Cluster-54524.101145	--	--
Cluster-54524.75743	XP_012730186.1	PREDICTED: uncharacterized protein LOC105934643 [Fundulus heteroclitus]
Cluster-54524.2780	EKC25882.1	Glutamate receptor delta-1 subunit [Crassostrea gigas]
Cluster-54524.109775	XP_007259319.1	PREDICTED: NHL repeat-containing protein 2 [Astyanax mexicanus]
Cluster-54524.109771	ENN74568.1	hypothetical protein YQE_08890, partial [Dendroctonus ponderosae]
Cluster-54524.83422	--	--
Cluster-54524.83428	KFM62793.1	Protein fat-free-like protein, partial [Stegodyphus mimosarum]
[truncated: 45,541 more rows]
