# Supplementary material for: Transcriptomic analysis of gills provides insights into the molecular basis of molting in Chinese mitten crab (Eriocheir sinensis)
Source: PeerJ. 2019 Jun 28;7:e7182. doi: 10.7717/peerj.7182 (PMC6601604; doi:10.7717/peerj.7182)
Supplement: Supplemental Information 2 [file peerj-07-7182-s003.xlsx]

## Sheet: Sheet1
gene ID	gene name	primer	product size
Cluster-54524.92396	ABCB8	AAGTCTACTGTTGCTCAGCTGTTA	134
		TCCTGGTTGATGAATCCAATGACT
Cluster-54524.97192	ARL5B	CACATGTGTCCGCTATGTATCAAC	175
		TTCAATCCGCGATAGTTTTTACGG
Cluster-54524.89275	BCDO2	TGAGTGAGAGTGAATGTTCAGGAG	110
		CGGTGTTAAAAGCTGTGATTCCTT
Cluster-54524.38465	COX1	TGCAGTAGGTGGTTTTGGTAATTG	176
		AAGGAGGATAAACTGTCCATCCAG
Cluster-54524.65348	FEM-1	CGTGGTGTCCTACTTGTTAGAGAA	145
		GGCGACCTCAATGTCTGAATTATG
Cluster-54524.72490	NADK	ATCTTGATTACAAGCTCGCTGAGA	193
		GAAGCGACAGAAACACTTTGATGA
Cluster-54524.92694	PRSS7	GTTGTTTGTGTGTTGGAGAGCATA	101
		CAACATTGACACCACTCGATTGAA
Cluster-54524.101269	RDH12	AAGGTTCTGTTTGCTCCGTTTATG	107
		CATTCCTTGTTGTCGAGTTCTTCC
Cluster-54524.93449	SLC7A5	TCCGTCATGAAGTTGAGGTAGTTC	141
		CATCTACTTGATCATGGGCAACAC
Sequences of primers for qPCR validation.
