# Supplementary material for: Transcriptomic analysis of gills provides insights into the molecular basis of molting in Chinese mitten crab (Eriocheir sinensis)
Source: PeerJ. 2019 Jun 28;7:e7182. doi: 10.7717/peerj.7182 (PMC6601604; doi:10.7717/peerj.7182)
Supplement: Table S1 [file peerj-07-7182-s005.xlsx]

## Sheet: EGi_AvsEGi_C_up.DEG_GO_enrichme
GO_accession	Description	Term_type	Over_represented_pValue	Corrected_pValue	Gene_names
A vs C-UP
GO:0042302	structural constituent of cuticle	molecular_function	4.29e-45	4.78e-41	Cluster-54524.90058,Cluster-54524.87610,Cluster-54524.89188,Cluster-54524.119859,Cluster-54524.100949,Cluster-54524.58959,Cluster-54524.64422,Cluster-54524.90165,Cluster-54524.88982,Cluster-54524.66714,Cluster-54524.62972,Cluster-54524.89205,Cluster-54524.89484,Cluster-54524.89337,Cluster-54524.120018,Cluster-54524.101302,Cluster-54524.101301,Cluster-54524.65264,Cluster-54524.89429,Cluster-54524.…
GO:0008061	chitin binding	molecular_function	9.02e-21	4.72e-17	Cluster-54524.95573,Cluster-54524.88803,Cluster-54524.91210,Cluster-54524.94088,Cluster-54524.91237,Cluster-54524.88888,Cluster-54524.90197,Cluster-54524.94617,Cluster-54524.89260,Cluster-54524.130159,Cluster-54524.89703,Cluster-54524.56673,Cluster-54524.119327,Cluster-54524.90234,Cluster-54524.92444,Cluster-54524.89333,Cluster-54524.91438,Cluster-54524.91046,Cluster-54524.89591,Cluster-54524.898…
GO:0006030	chitin metabolic process	biological_process	1.45e-20	4.72e-17	Cluster-54524.91438,Cluster-54524.89333,Cluster-54524.65783,Cluster-54524.92444,Cluster-54524.90234,Cluster-54524.56673,Cluster-54524.89260,Cluster-54524.130159,Cluster-54524.89703,Cluster-54524.94617,Cluster-54524.90197,Cluster-54524.88888,Cluster-54524.91237,Cluster-54524.94088,Cluster-54524.91210,Cluster-54524.88803,Cluster-54524.95573,Cluster-54524.89860,Cluster-54524.92113,Cluster-54524.8962…
GO:1901071	glucosamine-containing compound metabolic process	biological_process	1.69e-20	4.72e-17	Cluster-54524.90197,Cluster-54524.88888,Cluster-54524.91237,Cluster-54524.94088,Cluster-54524.91210,Cluster-54524.95573,Cluster-54524.88803,Cluster-54524.91438,Cluster-54524.89333,Cluster-54524.65783,Cluster-54524.92444,Cluster-54524.90234,Cluster-54524.56673,Cluster-54524.130159,Cluster-54524.89703,Cluster-54524.89260,Cluster-54524.94617,Cluster-54524.90969,Cluster-54524.89371,Cluster-54524.9557…
GO:0006040	amino sugar metabolic process	biological_process	2.03e-18	4.53e-15	Cluster-54524.89371,Cluster-54524.95572,Cluster-54524.90969,Cluster-54524.89884,Cluster-54524.91046,Cluster-54524.89591,Cluster-54524.86200,Cluster-54524.89138,Cluster-54524.92113,Cluster-54524.89629,Cluster-54524.89860,Cluster-77214.1,Cluster-54524.94088,Cluster-54524.91210,Cluster-54524.90197,Cluster-54524.88888,Cluster-54524.91237,Cluster-54524.95573,Cluster-54524.88803,Cluster-54524.89333,Clu…
GO:0006022	aminoglycan metabolic process	biological_process	5.56e-15	1.03e-11	Cluster-54524.88803,Cluster-54524.91210,Cluster-54524.88888,Cluster-54524.89703,Cluster-54524.90234,Cluster-54524.89333,Cluster-54524.89591,Cluster-54524.95572,Cluster-54524.90969,Cluster-77214.1,Cluster-54524.89860,Cluster-54524.97190,Cluster-54524.95573,Cluster-54524.94088,Cluster-54524.91237,Cluster-54524.90197,Cluster-54524.94617,Cluster-54524.89260,Cluster-54524.130159,Cluster-54524.56673,Cl…
GO:0005576	extracellular region	cellular_component	3.59e-08	5.72e-05	Cluster-77214.1,Cluster-54524.63242,Cluster-54524.88868,Cluster-54524.89997,Cluster-54524.110491,Cluster-54524.111763,Cluster-54524.56776,Cluster-54524.91457,Cluster-54524.95572,Cluster-54524.119301,Cluster-54524.97941,Cluster-54524.120876,Cluster-54524.90201,Cluster-54524.55528,Cluster-54524.103072,Cluster-54524.99464,Cluster-54524.128716,Cluster-54524.91367,Cluster-54524.91210,Cluster-54524.888…
GO:0005198	structural molecule activity	molecular_function	9.48e-08	0.00013214	Cluster-54524.116738,Cluster-54524.101303,Cluster-54524.65376,Cluster-54524.91430,Cluster-54524.58958,Cluster-54524.81501,Cluster-54524.88627,Cluster-54524.67265,Cluster-54524.114169,Cluster-54524.90988,Cluster-54524.116134,Cluster-54524.89184,Cluster-54524.93584,Cluster-54524.91367,Cluster-54524.107763,Cluster-54524.99464,Cluster-54524.62972,Cluster-54524.90201,Cluster-54524.92287,Cluster-54524.…
GO:0004026	alcohol O-acetyltransferase activity	molecular_function	1.98e-06	0.0022081	Cluster-54524.64414,Cluster-54524.66380,Cluster-54524.66381,Cluster-54524.121240,Cluster-54524.66593,Cluster-54524.66378
GO:0034318	alcohol O-acyltransferase activity	molecular_function	1.98e-06	0.0022081	Cluster-54524.66593,Cluster-54524.66378,Cluster-54524.66380,Cluster-54524.64414,Cluster-54524.66381,Cluster-54524.121240
GO:0016413	O-acetyltransferase activity	molecular_function	2.93e-06	0.0029699	Cluster-54524.66593,Cluster-54524.66378,Cluster-54524.64414,Cluster-54524.66380,Cluster-54524.66381,Cluster-54524.121240
A vs C-DOWN
GO:0016491	oxidoreductase activity	molecular_function	2.96e-19	3.3e-15	Cluster-54524.94038,Cluster-54524.97210,Cluster-54524.88075,Cluster-54524.132616,Cluster-54524.105152,Cluster-54524.90971,Cluster-54524.101330,Cluster-54524.115685,Cluster-54524.91789,Cluster-54524.111298,Cluster-54524.93725,Cluster-54524.49602,Cluster-54524.49804,Cluster-54524.88917,Cluster-54524.83019,Cluster-54524.90470,Cluster-54524.93064,Cluster-54524.104847,Cluster-54524.105910,Cluster-5452…
GO:0055114	oxidation-reduction process	biological_process	7.12e-14	3.97e-10	Cluster-21372.0,Cluster-54524.88813,Cluster-54524.93725,Cluster-54524.49602,Cluster-54524.49804,Cluster-54524.111298,Cluster-54524.75122,Cluster-54524.91789,Cluster-54524.49741,Cluster-54524.48256,Cluster-54524.111534,Cluster-54524.90073,Cluster-54524.104847,Cluster-54524.100647,Cluster-54524.105910,Cluster-54524.90470,Cluster-54524.91949,Cluster-54524.93064,Cluster-54524.88718,Cluster-54524.8301…
GO:0003824	catalytic activity	molecular_function	2.86e-13	1.07e-09	Cluster-54524.78335,Cluster-54524.110958,Cluster-54524.90009,Cluster-54524.93064,Cluster-54524.28934,Cluster-54524.78950,Cluster-54524.89725,Cluster-54524.104491,Cluster-54524.104847,Cluster-54524.97210,Cluster-54524.83991,Cluster-54524.90649,Cluster-54524.94038,Cluster-54524.105152,Cluster-54524.93024,Cluster-54524.92137,Cluster-54524.97823,Cluster-54524.78192,Cluster-54524.108987,Cluster-54524.…
GO:0044710	single-organism metabolic process	biological_process	8.45e-10	2.36e-06	Cluster-54524.82462,Cluster-54524.108331,Cluster-54524.89548,Cluster-54524.111919,Cluster-54524.91064,Cluster-54524.89535,Cluster-21750.0,Cluster-54524.111538,Cluster-54524.98237,Cluster-54524.89611,Cluster-54524.87797,Cluster-54524.114429,Cluster-54524.702,Cluster-54524.49538,Cluster-54524.95033,Cluster-54524.90463,Cluster-54524.115092,Cluster-54524.125282,Cluster-54524.126682,Cluster-54524.1014…
GO:0004807	triose-phosphate isomerase activity	molecular_function	4.27e-09	8.28e-06	Cluster-54524.101778,Cluster-54524.50090,Cluster-54524.109745,Cluster-54524.110164,Cluster-54524.75883,Cluster-54524.110163,Cluster-54524.75884
GO:0050662	coenzyme binding	molecular_function	4.45e-09	8.28e-06	Cluster-54524.101886,Cluster-54524.82608,Cluster-54524.101481,Cluster-54524.96555,Cluster-54524.89506,Cluster-54524.81301,Cluster-54524.100083,Cluster-54524.92105,Cluster-54524.89748,Cluster-54524.113967,Cluster-54524.66386,Cluster-54524.67882,Cluster-54524.98190,Cluster-54524.80726,Cluster-54524.101269,Cluster-54524.135784,Cluster-54524.96556,Cluster-54524.79273,Cluster-54524.90409,Cluster-54524…
GO:0016209	antioxidant activity	molecular_function	2.94e-08	4.55e-05	Cluster-54524.44143,Cluster-54524.132616,Cluster-23118.1,Cluster-54524.87196,Cluster-54524.94038,Cluster-20408.0,Cluster-54524.108935,Cluster-54524.81053,Cluster-54524.111531,Cluster-54524.92439,Cluster-54524.89109,Cluster-54524.94063,Cluster-54524.87052,Cluster-54524.88917,Cluster-54524.81499,Cluster-54524.92313,Cluster-54524.111534,Cluster-54524.91179,Cluster-54524.93064
GO:0048037	cofactor binding	molecular_function	3.26e-08	4.55e-05	Cluster-54524.105152,Cluster-54524.93568,Cluster-54524.90971,Cluster-54524.94352,Cluster-54524.48931,Cluster-54524.97210,Cluster-54524.93162,Cluster-54524.115685,Cluster-54524.104523,Cluster-54524.87351,Cluster-20643.0,Cluster-54524.99766,Cluster-54524.101330,Cluster-54524.82607,Cluster-54524.49804,Cluster-54524.90409,Cluster-54524.91789,Cluster-54524.78801,Cluster-54524.106819,Cluster-54524.1054…
GO:0008152	metabolic process	biological_process	1.15e-07	0.0001429	Cluster-54524.114429,Cluster-54524.92998,Cluster-54524.702,Cluster-54524.109506,Cluster-54524.96597,Cluster-54524.108331,Cluster-54524.91064,Cluster-54524.89535,Cluster-21750.0,Cluster-54524.118645,Cluster-54524.94462,Cluster-54524.76462,Cluster-54524.119706,Cluster-54524.48875,Cluster-54524.66370,Cluster-54524.92227,Cluster-54524.100083,Cluster-54524.98158,Cluster-54524.98899,Cluster-54524.90463…
GO:0016616	oxidoreductase activity, acting on the CH-OH group of donors, NAD or NADP as acceptor	molecular_function	2.24e-07	0.00024933	Cluster-54524.93725,Cluster-54524.49804,Cluster-54524.101282,Cluster-54524.85863,Cluster-54524.101481,Cluster-54524.102814,Cluster-54524.96555,Cluster-54524.104847,Cluster-54524.105493,Cluster-54524.90470,Cluster-54524.92105,Cluster-54524.89748,Cluster-54524.88718,Cluster-54524.91140,Cluster-54524.90971,Cluster-54524.93568,Cluster-54524.105152,Cluster-54524.66386,Cluster-54524.97210,Cluster-54524…
GO:0044723	single-organism carbohydrate metabolic process	biological_process	3.15e-07	0.00031956	Cluster-54524.108331,Cluster-54524.89548,Cluster-54524.91064,Cluster-54524.107010,Cluster-54524.106050,Cluster-54524.75884,Cluster-54524.114635,Cluster-54524.75883,Cluster-54524.96556,Cluster-54524.90365,Cluster-54524.134366,Cluster-54524.110164,Cluster-54524.54864,Cluster-54524.110163,Cluster-54524.109745,Cluster-54524.95502,Cluster-54524.89506,Cluster-54524.96555,Cluster-54524.92245,Cluster-545…
GO:0016614	oxidoreductase activity, acting on CH-OH group of donors	molecular_function	3.61e-07	0.00033511	Cluster-54524.96555,Cluster-54524.104847,Cluster-54524.105493,Cluster-54524.102814,Cluster-54524.92105,Cluster-54524.89748,Cluster-54524.88718,Cluster-54524.90470,Cluster-54524.93725,Cluster-54524.49804,Cluster-54524.101481,Cluster-54524.101282,Cluster-54524.85863,Cluster-54524.96556,Cluster-54524.115685,Cluster-54524.104523,Cluster-54524.115091,Cluster-54524.98906,Cluster-54524.93568,Cluster-545…
GO:0019362	pyridine nucleotide metabolic process	biological_process	5.29e-07	0.00045374	Cluster-54524.105493,Cluster-54524.96555,Cluster-54524.89939,Cluster-54524.92245,Cluster-54524.102814,Cluster-54524.92105,Cluster-54524.101778,Cluster-54524.87704,Cluster-54524.110163,Cluster-54524.109745,Cluster-54524.91789,Cluster-54524.75884,Cluster-54524.96556,Cluster-54524.89922,Cluster-54524.75883,Cluster-54524.90365,Cluster-54524.115091,Cluster-54524.110164,Cluster-54524.90971,Cluster-5452…
GO:0072524	pyridine-containing compound metabolic process	biological_process	5.81e-07	0.00046267	Cluster-54524.101778,Cluster-54524.87704,Cluster-54524.92105,Cluster-54524.102814,Cluster-54524.105493,Cluster-54524.96555,Cluster-54524.92245,Cluster-54524.89939,Cluster-54524.109745,Cluster-54524.91789,Cluster-54524.110163,Cluster-20643.0,Cluster-54524.115091,Cluster-54524.90365,Cluster-54524.110164,Cluster-54524.75884,Cluster-54524.96556,Cluster-54524.89922,Cluster-54524.75883,Cluster-54524.50…
GO:0006013	mannose metabolic process	biological_process	9.6e-07	0.00071413	Cluster-54524.119705,Cluster-54524.110164,Cluster-54524.90365,Cluster-54524.101778,Cluster-54524.89939,Cluster-54524.75883,Cluster-54524.119706,Cluster-54524.114635,Cluster-54524.75884,Cluster-54524.106050,Cluster-54524.109745,Cluster-54524.50090,Cluster-54524.114634,Cluster-54524.110163
GO:0019318	hexose metabolic process	biological_process	1.11e-06	0.00077209	Cluster-54524.107010,Cluster-54524.90530,Cluster-54524.75883,Cluster-54524.89922,Cluster-54524.106050,Cluster-54524.75884,Cluster-54524.114635,Cluster-54524.110164,Cluster-54524.90365,Cluster-54524.114634,Cluster-54524.89548,Cluster-54524.85261,Cluster-54524.50090,Cluster-54524.92245,Cluster-54524.89939,Cluster-54524.89506,Cluster-54524.119706,Cluster-54524.119705,Cluster-54524.87704,Cluster-5452…
GO:0046496	nicotinamide nucleotide metabolic process	biological_process	1.28e-06	0.00084017	Cluster-54524.110164,Cluster-54524.90365,Cluster-54524.115091,Cluster-54524.89922,Cluster-54524.96556,Cluster-54524.75883,Cluster-54524.75884,Cluster-54524.50090,Cluster-54524.90971,Cluster-54524.87704,Cluster-54524.101778,Cluster-54524.92105,Cluster-54524.102814,Cluster-54524.92245,Cluster-54524.96555,Cluster-54524.89939,Cluster-54524.105493,Cluster-54524.109745,Cluster-54524.110163
GO:0005996	monosaccharide metabolic process	biological_process	1.81e-06	0.0011208	Cluster-54524.89506,Cluster-54524.92245,Cluster-54524.89939,Cluster-54524.119706,Cluster-54524.119705,Cluster-54524.101778,Cluster-54524.87704,Cluster-54524.110163,Cluster-54524.54864,Cluster-54524.109745,Cluster-54524.90530,Cluster-54524.107010,Cluster-54524.75884,Cluster-54524.114635,Cluster-54524.106050,Cluster-54524.75883,Cluster-54524.89922,Cluster-54524.90365,Cluster-54524.110164,Cluster-54…
GO:0015035	protein disulfide oxidoreductase activity	molecular_function	4.19e-06	0.0023359	Cluster-54524.87196,Cluster-54524.84415,Cluster-54524.132616,Cluster-54524.92313,Cluster-54524.101414,Cluster-54524.84693,Cluster-54524.111531,Cluster-54524.131665,Cluster-54524.98870,Cluster-54524.107727,Cluster-54524.111534
GO:0006020	inositol metabolic process	biological_process	4.19e-06	0.0023359	Cluster-54524.50090,Cluster-54524.109745,Cluster-54524.110163,Cluster-54524.101778,Cluster-54524.110164,Cluster-54524.75884,Cluster-54524.75883,Cluster-54524.89939
GO:0015036	disulfide oxidoreductase activity	molecular_function	4.45e-06	0.0023659	Cluster-54524.111531,Cluster-54524.131665,Cluster-54524.84693,Cluster-54524.98870,Cluster-54524.111534,Cluster-54524.107727,Cluster-54524.84415,Cluster-54524.87196,Cluster-54524.92313,Cluster-54524.101414,Cluster-54524.132616
GO:0006733	oxidoreduction coenzyme metabolic process	biological_process	5.75e-06	0.0029141	Cluster-54524.102814,Cluster-54524.105493,Cluster-54524.100647,Cluster-54524.96555,Cluster-54524.92245,Cluster-54524.89939,Cluster-54524.101778,Cluster-54524.100568,Cluster-54524.87704,Cluster-54524.92105,Cluster-54524.110163,Cluster-54524.49602,Cluster-54524.75122,Cluster-54524.109745,Cluster-54524.91789,Cluster-54524.75884,Cluster-54524.89922,Cluster-54524.75883,Cluster-54524.96556,Cluster-5452…
GO:0006094	gluconeogenesis	biological_process	1.08e-05	0.0049776	Cluster-54524.101778,Cluster-54524.87704,Cluster-54524.90365,Cluster-54524.110164,Cluster-54524.75884,Cluster-54524.89922,Cluster-54524.75883,Cluster-54524.90530,Cluster-54524.89939,Cluster-54524.92245,Cluster-54524.50090,Cluster-54524.109745,Cluster-54524.110163,Cluster-54524.89548
GO:0006006	glucose metabolic process	biological_process	1.13e-05	0.0049776	Cluster-54524.75883,Cluster-54524.89922,Cluster-54524.75884,Cluster-54524.92245,Cluster-54524.89939,Cluster-54524.89506,Cluster-54524.90530,Cluster-54524.87704,Cluster-54524.101778,Cluster-54524.110164,Cluster-54524.90365,Cluster-54524.89548,Cluster-54524.110163,Cluster-54524.50090,Cluster-54524.109745
GO:0032787	monocarboxylic acid metabolic process	biological_process	1.16e-05	0.0049776	Cluster-54524.87704,Cluster-54524.105493,Cluster-54524.89939,Cluster-54524.102814,Cluster-54524.106494,Cluster-54524.49804,Cluster-54524.115091,Cluster-54524.124206,Cluster-54524.123968,Cluster-54524.115685,Cluster-54524.104523,Cluster-54524.89922,Cluster-54524.50090,Cluster-21863.0,Cluster-54524.90971,Cluster-54524.92105,Cluster-54524.81301,Cluster-54524.101778,Cluster-54524.92245,Cluster-54524.…
GO:0019319	hexose biosynthetic process	biological_process	1.17e-05	0.0049776	Cluster-54524.75884,Cluster-54524.75883,Cluster-54524.89922,Cluster-54524.90530,Cluster-54524.92245,Cluster-54524.89939,Cluster-54524.101778,Cluster-54524.87704,Cluster-54524.90365,Cluster-54524.110164,Cluster-54524.110163,Cluster-54524.89548,Cluster-54524.50090,Cluster-54524.109745
GO:0045454	cell redox homeostasis	biological_process	1.2e-05	0.0049776	Cluster-54524.111534,Cluster-54524.107727,Cluster-54524.98870,Cluster-54524.84693,Cluster-54524.131638,Cluster-54524.131665,Cluster-54524.81053,Cluster-54524.111531,Cluster-54524.132616,Cluster-23118.1,Cluster-54524.67917,Cluster-54524.92313,Cluster-54524.87196,Cluster-54524.84415
GO:0046364	monosaccharide biosynthetic process	biological_process	1.31e-05	0.0052259	Cluster-54524.101778,Cluster-54524.87704,Cluster-54524.90365,Cluster-54524.110164,Cluster-54524.75884,Cluster-54524.89922,Cluster-54524.75883,Cluster-54524.90530,Cluster-54524.89939,Cluster-54524.92245,Cluster-54524.50090,Cluster-54524.109745,Cluster-54524.110163,Cluster-54524.89548
GO:0051287	NAD binding	molecular_function	1.41e-05	0.0052719	Cluster-54524.89506,Cluster-54524.105493,Cluster-54524.96555,Cluster-54524.104847,Cluster-54524.102814,Cluster-54524.88718,Cluster-54524.81301,Cluster-54524.92105,Cluster-54524.101481,Cluster-54524.91789,Cluster-54524.93162,Cluster-54524.96556,Cluster-54524.113967,Cluster-54524.90971,Cluster-54524.80726,Cluster-54524.97210,Cluster-54524.67882
GO:0016861	intramolecular oxidoreductase activity, interconverting aldoses and ketoses	molecular_function	1.42e-05	0.0052719	Cluster-54524.92245,Cluster-54524.75884,Cluster-54524.75883,Cluster-54524.110164,Cluster-54524.101778,Cluster-54524.110163,Cluster-54524.109745,Cluster-54524.50090
GO:0006096	glycolytic process	biological_process	2.08e-05	0.0066808	Cluster-54524.92245,Cluster-54524.89939,Cluster-54524.75883,Cluster-54524.89922,Cluster-54524.75884,Cluster-54524.110164,Cluster-54524.90365,Cluster-54524.87704,Cluster-54524.101778,Cluster-54524.110163,Cluster-54524.109745,Cluster-54524.50090
GO:0006757	ATP generation from ADP	biological_process	2.08e-05	0.0066808	Cluster-54524.92245,Cluster-54524.89939,Cluster-54524.75884,Cluster-54524.75883,Cluster-54524.89922,Cluster-54524.90365,Cluster-54524.110164,Cluster-54524.101778,Cluster-54524.87704,Cluster-54524.110163,Cluster-54524.109745,Cluster-54524.50090
GO:0046031	ADP metabolic process	biological_process	2.12e-05	0.0066808	Cluster-54524.90365,Cluster-54524.110164,Cluster-54524.101778,Cluster-54524.87704,Cluster-54524.92245,Cluster-54524.89939,Cluster-54524.75884,Cluster-54524.75883,Cluster-54524.89922,Cluster-54524.109745,Cluster-54524.50090,Cluster-54524.110163
GO:0006165	nucleoside diphosphate phosphorylation	biological_process	2.23e-05	0.0066808	Cluster-54524.50090,Cluster-54524.70481,Cluster-54524.109745,Cluster-54524.110163,Cluster-54524.101778,Cluster-54524.87704,Cluster-54524.90365,Cluster-54524.110164,Cluster-54524.75884,Cluster-54524.89922,Cluster-54524.75883,Cluster-54524.89939,Cluster-54524.92245
GO:0003950	NAD+ ADP-ribosyltransferase activity	molecular_function	2.24e-05	0.0066808	Cluster-54524.84637,Cluster-54524.110958,Cluster-54524.45335,Cluster-54524.100941,Cluster-54524.97823,Cluster-54524.121278,Cluster-54524.97011
GO:0009135	purine nucleoside diphosphate metabolic process	biological_process	2.28e-05	0.0066808	Cluster-54524.92245,Cluster-54524.89939,Cluster-54524.75884,Cluster-54524.89922,Cluster-54524.75883,Cluster-54524.90365,Cluster-54524.110164,Cluster-54524.101778,Cluster-54524.87704,Cluster-54524.110163,Cluster-54524.109745,Cluster-54524.50090
GO:0009179	purine ribonucleoside diphosphate metabolic process	biological_process	2.28e-05	0.0066808	Cluster-54524.87704,Cluster-54524.101778,Cluster-54524.110164,Cluster-54524.90365,Cluster-54524.89922,Cluster-54524.75883,Cluster-54524.75884,Cluster-54524.89939,Cluster-54524.92245,Cluster-54524.50090,Cluster-54524.109745,Cluster-54524.110163
GO:0009185	ribonucleoside diphosphate metabolic process	biological_process	2.28e-05	0.0066808	Cluster-54524.101778,Cluster-54524.87704,Cluster-54524.90365,Cluster-54524.110164,Cluster-54524.75884,Cluster-54524.89922,Cluster-54524.75883,Cluster-54524.92245,Cluster-54524.89939,Cluster-54524.50090,Cluster-54524.109745,Cluster-54524.110163
GO:0005975	carbohydrate metabolic process	biological_process	2.38e-05	0.0068077	Cluster-54524.110958,Cluster-54524.101098,Cluster-54524.48256,Cluster-54524.102814,Cluster-54524.89939,Cluster-54524.105493,Cluster-54524.87704,Cluster-54524.45290,Cluster-54524.75433,Cluster-54524.85261,Cluster-54524.90971,Cluster-54524.114634,Cluster-54524.50090,Cluster-54524.111403,Cluster-54524.89922,Cluster-54524.105361,Cluster-54524.90530,Cluster-54524.75438,Cluster-54524.133023,Cluster-545…
GO:0046939	nucleotide phosphorylation	biological_process	2.46e-05	0.0068679	Cluster-54524.50090,Cluster-54524.70481,Cluster-54524.109745,Cluster-54524.110163,Cluster-54524.101778,Cluster-54524.87704,Cluster-54524.90365,Cluster-54524.110164,Cluster-54524.75884,Cluster-54524.75883,Cluster-54524.89922,Cluster-54524.92245,Cluster-54524.89939
GO:0015976	carbon utilization	biological_process	3.69e-05	0.010038	Cluster-54524.109745,Cluster-54524.101481,Cluster-54524.50090,Cluster-54524.110163,Cluster-54524.110164,Cluster-54524.87704,Cluster-54524.101778,Cluster-54524.89939,Cluster-54524.75883,Cluster-54524.75884
GO:0051186	cofactor metabolic process	biological_process	3.85e-05	0.010216	Cluster-54524.102814,Cluster-54524.100647,Cluster-54524.89939,Cluster-19242.0,Cluster-54524.105493,Cluster-54524.100568,Cluster-54524.87704,Cluster-54524.72450,Cluster-54524.88718,Cluster-54524.70584,Cluster-54524.49602,Cluster-54524.49804,Cluster-54524.75122,Cluster-54524.104954,Cluster-54524.91789,Cluster-54524.104523,Cluster-54524.89922,Cluster-20643.0,Cluster-54524.104554,Cluster-54524.124206…
GO:0019751	polyol metabolic process	biological_process	5.19e-05	0.013476	Cluster-54524.50090,Cluster-54524.109745,Cluster-54524.110163,Cluster-54524.108331,Cluster-54524.101778,Cluster-54524.110164,Cluster-54524.75884,Cluster-54524.75883,Cluster-54524.89939
GO:0016052	carbohydrate catabolic process	biological_process	6.66e-05	0.016893	Cluster-54524.89922,Cluster-54524.75883,Cluster-54524.101773,Cluster-54524.75884,Cluster-54524.89939,Cluster-54524.92245,Cluster-54524.87704,Cluster-54524.101778,Cluster-54524.110164,Cluster-54524.90365,Cluster-54524.110163,Cluster-54524.50090,Cluster-54524.109745
GO:0044724	single-organism carbohydrate catabolic process	biological_process	7.78e-05	0.019278	Cluster-54524.110163,Cluster-54524.50090,Cluster-54524.109745,Cluster-54524.75884,Cluster-54524.75883,Cluster-54524.89922,Cluster-54524.89939,Cluster-54524.92245,Cluster-54524.101778,Cluster-54524.87704,Cluster-54524.90365,Cluster-54524.110164
GO:1901135	carbohydrate derivative metabolic process	biological_process	8.3e-05	0.020119	Cluster-54524.49538,Cluster-54524.96556,Cluster-21060.0,Cluster-54524.134033,Cluster-54524.111919,Cluster-54524.115636,Cluster-54524.92105,Cluster-54524.95502,Cluster-54524.91501,Cluster-54524.96555,Cluster-54524.78192,Cluster-54524.70481,Cluster-54524.96393,Cluster-54524.109745,Cluster-54524.54864,Cluster-54524.90463,Cluster-54524.124206,Cluster-20643.0,Cluster-65625.0,Cluster-54524.105361,Clust…
GO:0009132	nucleoside diphosphate metabolic process	biological_process	9.69e-05	0.023002	Cluster-54524.110163,Cluster-54524.109745,Cluster-54524.70481,Cluster-54524.50090,Cluster-54524.89939,Cluster-54524.92245,Cluster-54524.75883,Cluster-54524.89922,Cluster-54524.75884,Cluster-54524.110164,Cluster-54524.90365,Cluster-54524.87704,Cluster-54524.101778
GO:0006732	coenzyme metabolic process	biological_process	0.00010359	0.024073	Cluster-54524.90971,Cluster-54524.50090,Cluster-54524.104523,Cluster-54524.89922,Cluster-20643.0,Cluster-54524.104554,Cluster-54524.124206,Cluster-54524.115091,Cluster-54524.70584,Cluster-54524.49602,Cluster-54524.49804,Cluster-54524.75122,Cluster-54524.91789,Cluster-54524.102814,Cluster-54524.100647,Cluster-54524.89939,Cluster-54524.105493,Cluster-19242.0,Cluster-54524.100568,Cluster-54524.87704…
GO:0019725	cellular homeostasis	biological_process	0.00017323	0.038993	Cluster-54524.111534,Cluster-54524.98870,Cluster-54524.84693,Cluster-54524.131638,Cluster-54524.131665,Cluster-54524.94634,Cluster-54524.67917,Cluster-54524.92313,Cluster-54524.96398,Cluster-54524.84415,Cluster-54524.126035,Cluster-54524.107727,Cluster-54524.81053,Cluster-54524.111531,Cluster-54524.132616,Cluster-23118.1,Cluster-54524.109874,Cluster-21777.0,Cluster-54524.87196,Cluster-54524.92944
GO:0004616	phosphogluconate dehydrogenase (decarboxylating) activity	molecular_function	0.00017827	0.038993	Cluster-54524.115091,Cluster-54524.92105,Cluster-54524.105493,Cluster-54524.96555,Cluster-54524.102814,Cluster-54524.90971,Cluster-54524.96556
GO:0019521	D-gluconate metabolic process	biological_process	0.00017827	0.038993	Cluster-54524.105493,Cluster-54524.96555,Cluster-54524.102814,Cluster-54524.90971,Cluster-54524.96556,Cluster-54524.115091,Cluster-54524.92105
GO:0034754	cellular hormone metabolic process	biological_process	0.00018373	0.039413	Cluster-54524.105152,Cluster-54524.93234,Cluster-54524.93568,Cluster-54524.101282,Cluster-54524.95001,Cluster-54524.66386,Cluster-54524.89748
GO:0019520	aldonic acid metabolic process	biological_process	0.0001925	0.040516	Cluster-54524.90971,Cluster-54524.102814,Cluster-54524.96556,Cluster-54524.105493,Cluster-54524.96555,Cluster-54524.115091,Cluster-54524.92105
GO:0001758	retinal dehydrogenase activity	molecular_function	0.00020616	0.041813	Cluster-54524.93234,Cluster-54524.95001
GO:0042572	retinol metabolic process	biological_process	0.00020616	0.041813	Cluster-54524.95001,Cluster-54524.93234
GO:1901615	organic hydroxy compound metabolic process	biological_process	0.00023142	0.046099	Cluster-54524.75884,Cluster-54524.75883,Cluster-54524.123968,Cluster-54524.89939,Cluster-54524.101778,Cluster-20643.0,Cluster-54524.110164,Cluster-54524.110163,Cluster-54524.108331,Cluster-54524.93234,Cluster-54524.95001,Cluster-54524.50090,Cluster-54524.109745
GO:0016051	carbohydrate biosynthetic process	biological_process	0.00024466	0.047881	Cluster-54524.90530,Cluster-54524.75884,Cluster-54524.89922,Cluster-54524.75883,Cluster-54524.87351,Cluster-54524.90365,Cluster-54524.134366,Cluster-54524.110164,Cluster-54524.89548,Cluster-54524.91064,Cluster-54524.50090,Cluster-54524.89939,Cluster-54524.92245,Cluster-54524.122589,Cluster-54524.108833,Cluster-54524.101778,Cluster-54524.87704,Cluster-54524.110163,Cluster-54524.109745
D vs E UP
GO:0003824	catalytic activity	molecular_function	6.1389e-23	6.8479e-19	Cluster-54524.91626,Cluster-20113.1,Cluster-54524.93268,Cluster-54524.49804,Cluster-54524.81656,Cluster-54524.109054,Cluster-54524.112805,Cluster-54524.97294,Cluster-54524.81361,Cluster-54524.115068,Cluster-54524.93454,Cluster-54524.111298,Cluster-54524.88195,Cluster-54524.118500,Cluster-54524.98916,Cluster-54524.98899,Cluster-54524.132814,Cluster-54524.95220,Cluster-54524.101098,Cluster-54524.95…
GO:0016491	oxidoreductase activity	molecular_function	2.8822e-21	1.6075e-17	Cluster-54524.81656,Cluster-54524.49804,Cluster-54524.115590,Cluster-54524.81361,Cluster-54524.53400,Cluster-54524.112805,Cluster-54524.88813,Cluster-54524.115187,Cluster-54524.111298,Cluster-54524.114228,Cluster-54524.134638,Cluster-54524.136478,Cluster-54524.96670,Cluster-54524.90914,Cluster-54524.76843,Cluster-54524.105493,Cluster-54524.92340,Cluster-54524.81053,Cluster-54524.103566,Cluster-54…
GO:0048037	cofactor binding	molecular_function	1.5292e-20	5.6861e-17	Cluster-54524.105493,Cluster-54524.103566,Cluster-54524.66670,Cluster-54524.49124,Cluster-54524.95104,Cluster-54524.92105,Cluster-54524.115054,Cluster-54524.134170,Cluster-54524.101511,Cluster-54524.82607,Cluster-54524.81159,Cluster-54524.101928,Cluster-54524.105694,Cluster-54524.79273,Cluster-54524.93956,Cluster-54524.81361,Cluster-54524.91114,Cluster-54524.116053,Cluster-54524.53400,Cluster-545…
GO:0050662	coenzyme binding	molecular_function	4.9585e-19	1.3828e-15	Cluster-54524.49804,Cluster-54524.90175,Cluster-54524.53400,Cluster-54524.101269,Cluster-54524.93956,Cluster-54524.81361,Cluster-54524.114228,Cluster-54524.115663,Cluster-54524.82608,Cluster-54524.99766,Cluster-54524.87351,Cluster-54524.104847,Cluster-54524.91323,Cluster-54524.118770,Cluster-54524.90409,Cluster-54524.115054,Cluster-54524.92105,Cluster-54524.95104,Cluster-54524.89748,Cluster-54524…
GO:0008152	metabolic process	biological_process	4.5502e-17	1.0152e-13	Cluster-54524.116963,Cluster-54524.84800,Cluster-54524.97890,Cluster-54524.88699,Cluster-54524.127703,Cluster-54524.117066,Cluster-54524.93956,Cluster-54524.91114,Cluster-54524.97119,Cluster-54524.52966,Cluster-54524.117658,Cluster-54524.74480,Cluster-54524.92842,Cluster-54524.79273,Cluster-54524.102316,Cluster-54524.112372,Cluster-54524.47878,Cluster-54524.98645,Cluster-54524.130296,Cluster-5452…
GO:0044710	single-organism metabolic process	biological_process	6.9676e-17	1.2954e-13	Cluster-54524.115591,Cluster-54524.131713,Cluster-54524.114635,Cluster-54524.52061,Cluster-54524.97939,Cluster-54524.48208,Cluster-54524.89922,Cluster-54524.58469,Cluster-54524.93404,Cluster-54524.90971,Cluster-54524.112160,Cluster-54524.93148,Cluster-54524.94323,Cluster-54524.86499,Cluster-54524.93177,Cluster-54524.126682,Cluster-54524.133905,Cluster-54524.101159,Cluster-54524.100256,Cluster-545…
GO:0055114	oxidation-reduction process	biological_process	1.6892e-16	2.6919e-13	Cluster-54524.87052,Cluster-54524.83396,Cluster-54524.87351,Cluster-54524.115663,Cluster-54524.88075,Cluster-54524.84332,Cluster-54524.94038,Cluster-54524.94063,Cluster-54524.96031,Cluster-54524.104745,Cluster-54524.89623,Cluster-54524.115685,Cluster-63885.0,Cluster-54524.101886,Cluster-54524.89212,Cluster-54524.112541,Cluster-54524.89748,Cluster-54524.101463,Cluster-54524.93464,Cluster-54524.918…
GO:0005975	carbohydrate metabolic process	biological_process	2.1538e-12	3.0032e-09	Cluster-54524.92423,Cluster-54524.134366,Cluster-54524.89506,Cluster-54524.91637,Cluster-54524.93464,Cluster-54524.111403,Cluster-54524.95927,Cluster-54524.70928,Cluster-54524.133023,Cluster-54524.132525,Cluster-54524.90507,Cluster-54524.105205,Cluster-54524.87791,Cluster-54524.105806,Cluster-54524.90097,Cluster-54524.108832,Cluster-54524.102263,Cluster-54524.107011,Cluster-54524.114564,Cluster-5…
GO:0044723	single-organism carbohydrate metabolic process	biological_process	4.5182e-11	5.6e-08	Cluster-54524.116900,Cluster-54524.119705,Cluster-54524.114635,Cluster-54524.113565,Cluster-54524.119388,Cluster-54524.90507,Cluster-54524.115091,Cluster-54524.87791,Cluster-54524.105205,Cluster-54524.108833,Cluster-54524.102263,Cluster-54524.108832,Cluster-54524.107011,Cluster-54524.120474,Cluster-54524.50967,Cluster-54524.93404,Cluster-54524.70928,Cluster-54524.90971,Cluster-54524.81160,Cluster…
GO:0016614	oxidoreductase activity, acting on CH-OH group of donors	molecular_function	2.3069e-10	2.5733e-07	Cluster-54524.98906,Cluster-54524.81160,Cluster-54524.90971,Cluster-54524.114228,Cluster-54524.104847,Cluster-54524.49804,Cluster-54524.122417,Cluster-54524.86377,Cluster-54524.91381,Cluster-54524.53400,Cluster-54524.93956,Cluster-54524.97395,Cluster-54524.64326,Cluster-54524.93148,Cluster-54524.96555,Cluster-54524.115685,Cluster-54524.81159,Cluster-54524.93568,Cluster-54524.101511,Cluster-54524.…
GO:0006081	cellular aldehyde metabolic process	biological_process	2.9689e-10	3.0108e-07	Cluster-54524.97298,Cluster-54524.98916,Cluster-54524.81301,Cluster-54524.90971,Cluster-54524.81160,Cluster-54524.98043,Cluster-54524.114228,Cluster-54524.53400,Cluster-54524.96555,Cluster-54524.40184,Cluster-54524.98496,Cluster-54524.89939,Cluster-54524.52966,Cluster-54524.49804,Cluster-54524.84332,Cluster-54524.101511,Cluster-54524.90794,Cluster-54524.81159,Cluster-54524.105493,Cluster-54524.11…
GO:0016616	oxidoreductase activity, acting on the CH-OH group of donors, NAD or NADP as acceptor	molecular_function	1.5929e-09	1.3272e-06	Cluster-54524.101282,Cluster-54524.105493,Cluster-54524.110666,Cluster-54524.102263,Cluster-54524.89748,Cluster-54524.89212,Cluster-54524.115054,Cluster-54524.115091,Cluster-54524.92105,Cluster-54524.101511,Cluster-54524.54400,Cluster-54524.89623,Cluster-54524.81159,Cluster-54524.93568,Cluster-54524.53400,Cluster-54524.93956,Cluster-54524.97395,Cluster-54524.64326,Cluster-54524.93148,Cluster-5452…
GO:0036094	small molecule binding	molecular_function	1.6188e-09	1.3272e-06	Cluster-54524.48198,Cluster-54524.118718,Cluster-54524.114686,Cluster-54524.99184,Cluster-54524.109968,Cluster-54524.78988,Cluster-54524.66531,Cluster-54524.89062,Cluster-54524.91323,Cluster-54524.104847,Cluster-54524.104330,Cluster-54524.123680,Cluster-54524.95132,Cluster-54524.116428,Cluster-54524.41422,Cluster-54524.93882,Cluster-54524.104387,Cluster-54524.71555,Cluster-54524.119812,Cluster-54…
GO:0043436	oxoacid metabolic process	biological_process	5.2249e-09	3.7945e-06	Cluster-54524.89623,Cluster-54524.84332,Cluster-54524.110594,Cluster-54524.115685,Cluster-54524.53324,Cluster-54524.110666,Cluster-54524.50052,Cluster-54524.89212,Cluster-54524.79319,Cluster-54524.112541,Cluster-54524.109968,Cluster-54524.74416,Cluster-54524.112287,Cluster-54524.91323,Cluster-54524.84078,Cluster-54524.101238,Cluster-54524.114686,Cluster-54524.98496,Cluster-54524.101932,Cluster-54…
GO:0006082	organic acid metabolic process	biological_process	5.4426e-09	3.7945e-06	Cluster-54524.109968,Cluster-54524.74416,Cluster-54524.91323,Cluster-54524.112287,Cluster-54524.84078,Cluster-54524.114686,Cluster-54524.101238,Cluster-54524.98496,Cluster-54524.89623,Cluster-54524.110594,Cluster-54524.84332,Cluster-54524.115685,Cluster-54524.53324,Cluster-54524.50052,Cluster-54524.110666,Cluster-54524.112541,Cluster-54524.79319,Cluster-54524.89212,Cluster-54524.123491,Cluster-54…
GO:0000166	nucleotide binding	molecular_function	1.0122e-08	6.0088e-06	Cluster-54524.74902,Cluster-54524.40184,Cluster-54524.127703,Cluster-54524.90175,Cluster-54524.106679,Cluster-54524.104568,Cluster-54524.49084,Cluster-54524.97890,Cluster-54524.89596,Cluster-54524.112530,Cluster-54524.95182,Cluster-54524.128869,Cluster-54524.92105,Cluster-54524.115054,Cluster-54524.134170,Cluster-54524.117658,Cluster-54524.93816,Cluster-54524.76651,Cluster-54524.91671,Cluster-545…
GO:1901265	nucleoside phosphate binding	molecular_function	1.0122e-08	6.0088e-06	Cluster-54524.104330,Cluster-54524.123680,Cluster-54524.116428,Cluster-54524.95132,Cluster-54524.41422,Cluster-54524.93882,Cluster-54524.104387,Cluster-54524.48198,Cluster-54524.114686,Cluster-54524.118718,Cluster-54524.99184,Cluster-54524.109968,Cluster-54524.78988,Cluster-54524.104847,Cluster-54524.66531,Cluster-54524.89062,Cluster-54524.91323,Cluster-54524.91884,Cluster-54524.114683,Cluster-54…
GO:0044699	single-organism process	biological_process	1.0235e-08	6.0088e-06	Cluster-54524.111031,Cluster-54524.50967,Cluster-54524.108569,Cluster-54524.89468,Cluster-54524.99800,Cluster-54524.89766,Cluster-54524.115091,Cluster-54524.89250,Cluster-54524.76955,Cluster-54524.90794,Cluster-54524.82917,Cluster-54524.119388,Cluster-54524.49186,Cluster-54524.94490,Cluster-54524.113565,Cluster-54524.93568,Cluster-54524.78548,Cluster-54524.64326,Cluster-54524.136484,Cluster-54524…
GO:1901564	organonitrogen compound metabolic process	biological_process	1.26e-08	7.0218e-06	Cluster-54524.123491,Cluster-54524.93464,Cluster-54524.115636,Cluster-54524.40824,Cluster-54524.115092,Cluster-54524.71916,Cluster-54524.79119,Cluster-54524.41333,Cluster-54524.98368,Cluster-54524.84208,Cluster-54524.40793,Cluster-54524.111221,Cluster-54524.104187,Cluster-54524.88423,Cluster-54524.89282,Cluster-54524.104891,Cluster-54524.101354,Cluster-54524.70481,Cluster-54524.132525,Cluster-545…
GO:0019752	carboxylic acid metabolic process	biological_process	1.3219e-08	7.0218e-06	Cluster-54524.114683,Cluster-54524.89825,Cluster-54524.104569,Cluster-54524.90507,Cluster-54524.109395,Cluster-54524.102263,Cluster-54524.101932,Cluster-54524.107277,Cluster-54524.105114,Cluster-54524.114941,Cluster-54524.116900,Cluster-54524.104187,Cluster-54524.41333,Cluster-54524.71555,Cluster-54524.122417,Cluster-54524.91381,Cluster-54524.60763,Cluster-54524.111221,Cluster-54524.123491,Cluste…
GO:0016829	lyase activity	molecular_function	2.9141e-08	1.4776e-05	Cluster-54524.89825,Cluster-54524.132525,Cluster-54524.102263,Cluster-54524.119388,Cluster-54524.64693,Cluster-54524.104325,Cluster-54524.114941,Cluster-54524.76805,Cluster-54524.114596,Cluster-54524.116900,Cluster-54524.132835,Cluster-54524.98368,Cluster-54524.89548,Cluster-54524.90530,Cluster-54524.122417,Cluster-54524.132470,Cluster-54524.45901,Cluster-54524.94352,Cluster-54524.89939,Cluster-5…
GO:0043168	anion binding	molecular_function	3.9036e-08	1.8933e-05	Cluster-54524.92153,Cluster-54524.118500,Cluster-54524.99455,Cluster-54524.118770,Cluster-54524.132814,Cluster-54524.91626,Cluster-54524.72024,Cluster-54524.116053,Cluster-54524.97294,Cluster-54524.108111,Cluster-54524.101928,Cluster-54524.81159,Cluster-54524.57418,Cluster-54524.134163,Cluster-54524.48524,Cluster-54524.119443,Cluster-54524.95104,Cluster-54524.78559,Cluster-54524.49124,Cluster-545…
GO:0004616	phosphogluconate dehydrogenase (decarboxylating) activity	molecular_function	8.206e-08	3.6615e-05	Cluster-54524.114228,Cluster-54524.81159,Cluster-54524.90971,Cluster-54524.81160,Cluster-54524.101511,Cluster-54524.115091,Cluster-54524.92105,Cluster-54524.102263,Cluster-54524.110666,Cluster-54524.96555,Cluster-54524.105493
GO:0019521	D-gluconate metabolic process	biological_process	8.206e-08	3.6615e-05	Cluster-54524.102263,Cluster-54524.115091,Cluster-54524.92105,Cluster-54524.105493,Cluster-54524.110666,Cluster-54524.96555,Cluster-54524.81159,Cluster-54524.81160,Cluster-54524.90971,Cluster-54524.114228,Cluster-54524.101511
GO:0019520	aldonic acid metabolic process	biological_process	9.4243e-08	4.0434e-05	Cluster-54524.81160,Cluster-54524.90971,Cluster-54524.81159,Cluster-54524.114228,Cluster-54524.101511,Cluster-54524.102263,Cluster-54524.92105,Cluster-54524.115091,Cluster-54524.105493,Cluster-54524.110666,Cluster-54524.96555
GO:0043603	cellular amide metabolic process	biological_process	1.0279e-07	4.2469e-05	Cluster-54524.100219,Cluster-54524.109845,Cluster-54524.91884,Cluster-54524.106724,Cluster-54524.110008,Cluster-54524.109395,Cluster-54524.77754,Cluster-54524.104569,Cluster-54524.105114,Cluster-54524.119101,Cluster-54524.88423,Cluster-54524.58053,Cluster-54524.84208,Cluster-54524.98368,Cluster-54524.111221,Cluster-54524.60769,Cluster-54524.40793,Cluster-54524.91381,Cluster-54524.109193,Cluster-5…
GO:0044711	single-organism biosynthetic process	biological_process	1.2408e-07	4.9433e-05	Cluster-54524.119388,Cluster-54524.54400,Cluster-54524.90794,Cluster-54524.76805,Cluster-54524.83906,Cluster-54524.93568,Cluster-54524.113565,Cluster-54524.108833,Cluster-54524.48208,Cluster-54524.97298,Cluster-54524.89922,Cluster-54524.98043,Cluster-54524.92376,Cluster-54524.81301,Cluster-54524.98906,Cluster-54524.64326,Cluster-54524.136484,Cluster-54524.89548,Cluster-54524.90530,Cluster-54524.9…
GO:0016209	antioxidant activity	molecular_function	1.8656e-07	7.1761e-05	Cluster-54524.94038,Cluster-54524.89109,Cluster-54524.93816,Cluster-54524.94063,Cluster-54524.106268,Cluster-54524.121358,Cluster-54524.81053,Cluster-54524.113389,Cluster-54524.110756,Cluster-54524.89072,Cluster-54524.91125,Cluster-54524.87052,Cluster-54524.91179,Cluster-54524.120649,Cluster-54524.92313,Cluster-54524.92439,Cluster-54524.112805,Cluster-54524.93064,Cluster-54524.88917
GO:0032787	monocarboxylic acid metabolic process	biological_process	2.3975e-07	8.9148e-05	Cluster-54524.90507,Cluster-54524.115091,Cluster-54524.102263,Cluster-54524.120474,Cluster-54524.54400,Cluster-54524.90794,Cluster-54524.76805,Cluster-54524.107277,Cluster-54524.86377,Cluster-54524.122417,Cluster-54524.132470,Cluster-54524.89939,Cluster-54524.96555,Cluster-54524.98043,Cluster-54524.100404,Cluster-54524.81301,Cluster-54524.98906,Cluster-54524.81160,Cluster-54524.90971,Cluster-5452…
GO:0015035	protein disulfide oxidoreductase activity	molecular_function	2.9907e-07	0.00010616	Cluster-54524.98870,Cluster-54524.84693,Cluster-54524.72597,Cluster-54524.90914,Cluster-54524.134638,Cluster-54524.107727,Cluster-54524.91125,Cluster-54524.93816,Cluster-54524.49186,Cluster-54524.94622,Cluster-54524.84415,Cluster-54524.106268,Cluster-54524.92313
GO:0051287	NAD binding	molecular_function	3.0978e-07	0.00010616	Cluster-54524.98043,Cluster-54524.81362,Cluster-54524.104847,Cluster-54524.114228,Cluster-54524.81160,Cluster-54524.81301,Cluster-54524.90971,Cluster-54524.118770,Cluster-54524.89506,Cluster-54524.96555,Cluster-54524.64326,Cluster-54524.81361,Cluster-54524.81159,Cluster-54524.101928,Cluster-54524.113967,Cluster-54524.101511,Cluster-54524.92105,Cluster-54524.115054,Cluster-54524.103566,Cluster-545…
GO:0016874	ligase activity	molecular_function	3.1865e-07	0.00010616	Cluster-54524.109968,Cluster-54524.92153,Cluster-54524.102075,Cluster-54524.114228,Cluster-54524.96659,Cluster-54524.101238,Cluster-54524.114686,Cluster-54524.104568,Cluster-54524.110594,Cluster-54524.93816,Cluster-54524.93882,Cluster-54524.76651,Cluster-54524.91671,Cluster-54524.134163,Cluster-54524.86746,Cluster-54524.95182,Cluster-54524.91854,Cluster-54524.91125,Cluster-54524.107654,Cluster-54…
GO:0015036	disulfide oxidoreductase activity	molecular_function	3.2358e-07	0.00010616	Cluster-54524.106268,Cluster-54524.94622,Cluster-54524.84415,Cluster-54524.92313,Cluster-54524.134638,Cluster-54524.107727,Cluster-54524.91125,Cluster-54524.49186,Cluster-54524.93816,Cluster-54524.90914,Cluster-54524.98870,Cluster-54524.84693,Cluster-54524.72597
GO:0043604	amide biosynthetic process	biological_process	8.3e-07	0.00026453	Cluster-54524.105493,Cluster-54524.41672,Cluster-54524.112372,Cluster-54524.86746,Cluster-54524.56693,Cluster-54524.95182,Cluster-54524.111380,Cluster-54524.54520,Cluster-54524.93816,Cluster-54524.134163,Cluster-54524.53400,Cluster-54524.103560,Cluster-54524.81202,Cluster-54524.114095,Cluster-54524.49804,Cluster-54524.104568,Cluster-54524.110009,Cluster-54524.79118,Cluster-54524.136064,Cluster-54…
GO:0043038	amino acid activation	biological_process	1.0943e-06	0.0003299	Cluster-54524.93763,Cluster-54524.111221,Cluster-54524.101238,Cluster-54524.114686,Cluster-54524.104568,Cluster-54524.91381,Cluster-54524.96362,Cluster-54524.92153,Cluster-54524.109968,Cluster-54524.91125,Cluster-54524.95182,Cluster-54524.104569,Cluster-54524.109395,Cluster-54524.111031,Cluster-54524.86746,Cluster-54524.76651,Cluster-54524.134163,Cluster-54524.110594,Cluster-54524.83906,Cluster-5…
GO:0043039	tRNA aminoacylation	biological_process	1.0943e-06	0.0003299	Cluster-54524.110594,Cluster-54524.105114,Cluster-54524.83906,Cluster-54524.93816,Cluster-54524.76651,Cluster-54524.134163,Cluster-54524.111031,Cluster-54524.86746,Cluster-54524.95182,Cluster-54524.104569,Cluster-54524.109395,Cluster-54524.109968,Cluster-54524.91125,Cluster-54524.92153,Cluster-54524.96362,Cluster-54524.111221,Cluster-54524.93763,Cluster-54524.114686,Cluster-54524.101238,Cluster-5…
GO:0008610	lipid biosynthetic process	biological_process	1.5801e-06	0.00046385	Cluster-54524.105493,Cluster-54524.89748,Cluster-54524.115054,Cluster-54524.95033,Cluster-54524.96638,Cluster-54524.89623,Cluster-54524.115685,Cluster-54524.74948,Cluster-54524.79273,Cluster-54524.53400,Cluster-54524.93956,Cluster-54524.90248,Cluster-54524.90175,Cluster-54524.76689,Cluster-54524.90409,Cluster-54524.97233,Cluster-54524.91323,Cluster-54524.88813,Cluster-54524.74416,Cluster-54524.74…
GO:0009058	biosynthetic process	biological_process	1.7183e-06	0.00049149	Cluster-54524.101939,Cluster-54524.101238,Cluster-54524.100391,Cluster-54524.76689,Cluster-54524.132464,Cluster-54524.91899,Cluster-54524.87351,Cluster-54524.132066,Cluster-54524.96638,Cluster-54524.92969,Cluster-54524.90571,Cluster-54524.80951,Cluster-54524.45290,Cluster-54524.94462,Cluster-54524.94233,Cluster-54524.89623,Cluster-54524.110594,Cluster-54524.90451,Cluster-54524.105641,Cluster-5452…
GO:0016875	ligase activity, forming carbon-oxygen bonds	molecular_function	1.8286e-06	0.00049751	Cluster-54524.104568,Cluster-54524.91381,Cluster-54524.101238,Cluster-54524.114686,Cluster-54524.111221,Cluster-54524.93763,Cluster-54524.91125,Cluster-54524.109968,Cluster-54524.92153,Cluster-54524.96362,Cluster-54524.86746,Cluster-54524.111031,Cluster-54524.109395,Cluster-54524.104569,Cluster-54524.95182,Cluster-54524.93816,Cluster-54524.110594,Cluster-54524.83906,Cluster-54524.134163,Cluster-5…
GO:0016876	ligase activity, forming aminoacyl-tRNA and related compounds	molecular_function	1.8286e-06	0.00049751	Cluster-54524.86746,Cluster-54524.111031,Cluster-54524.104569,Cluster-54524.109395,Cluster-54524.95182,Cluster-54524.93816,Cluster-54524.83906,Cluster-54524.110594,Cluster-54524.134163,Cluster-54524.76651,Cluster-54524.101238,Cluster-54524.114686,Cluster-54524.91381,Cluster-54524.104568,Cluster-54524.111221,Cluster-54524.93763,Cluster-54524.109968,Cluster-54524.91125,Cluster-54524.96362,Cluster-5…
GO:0006418	tRNA aminoacylation for protein translation	biological_process	1.9558e-06	0.00051945	Cluster-54524.92153,Cluster-54524.96362,Cluster-54524.91125,Cluster-54524.109968,Cluster-54524.93763,Cluster-54524.111221,Cluster-54524.91381,Cluster-54524.104568,Cluster-54524.101238,Cluster-54524.114686,Cluster-54524.134163,Cluster-54524.105114,Cluster-54524.110594,Cluster-54524.83906,Cluster-54524.93816,Cluster-54524.95182,Cluster-54524.109395,Cluster-54524.104569,Cluster-54524.111031,Cluster-…
GO:0006098	pentose-phosphate shunt	biological_process	2.351e-06	0.00060359	Cluster-54524.105493,Cluster-54524.96555,Cluster-54524.40184,Cluster-54524.110666,Cluster-54524.89939,Cluster-54524.102263,Cluster-54524.115091,Cluster-54524.90507,Cluster-54524.92105,Cluster-54524.101511,Cluster-54524.97298,Cluster-54524.81159,Cluster-54524.90971,Cluster-54524.81160,Cluster-54524.114228
GO:0045454	cell redox homeostasis	biological_process	2.3808e-06	0.00060359	Cluster-54524.49186,Cluster-54524.93816,Cluster-54524.106268,Cluster-54524.94622,Cluster-54524.84415,Cluster-54524.84693,Cluster-54524.81053,Cluster-54524.121358,Cluster-54524.90914,Cluster-54524.91125,Cluster-54524.107727,Cluster-54524.134638,Cluster-54524.116662,Cluster-54524.92313,Cluster-54524.98870,Cluster-54524.108368
GO:0034660	ncRNA metabolic process	biological_process	2.6837e-06	0.00066526	Cluster-54524.113565,Cluster-54524.82668,Cluster-54524.83906,Cluster-54524.105114,Cluster-54524.108369,Cluster-54524.90927,Cluster-54524.109395,Cluster-54524.104569,Cluster-54524.111031,Cluster-54524.113246,Cluster-54524.112160,Cluster-54524.96362,Cluster-54524.40274,Cluster-54524.40824,Cluster-54524.116662,Cluster-54524.91125,Cluster-54524.111221,Cluster-54524.99058,Cluster-54524.93763,Cluster-5…
GO:0019682	glyceraldehyde-3-phosphate metabolic process	biological_process	2.7568e-06	0.00066853	Cluster-54524.101511,Cluster-54524.97298,Cluster-54524.81160,Cluster-54524.81159,Cluster-54524.90971,Cluster-54524.114228,Cluster-54524.105493,Cluster-54524.40184,Cluster-54524.96555,Cluster-54524.110666,Cluster-54524.89939,Cluster-54524.102263,Cluster-54524.92105,Cluster-54524.115091,Cluster-54524.90507
GO:0051156	glucose 6-phosphate metabolic process	biological_process	3.2051e-06	0.00075964	Cluster-54524.89939,Cluster-54524.102263,Cluster-54524.92105,Cluster-54524.115091,Cluster-54524.90507,Cluster-54524.105493,Cluster-54524.96555,Cluster-54524.110666,Cluster-54524.40184,Cluster-54524.81160,Cluster-54524.81159,Cluster-54524.90971,Cluster-54524.114228,Cluster-54524.101511,Cluster-54524.97298
GO:0004812	aminoacyl-tRNA ligase activity	molecular_function	3.2687e-06	0.00075964	Cluster-54524.92153,Cluster-54524.96362,Cluster-54524.91125,Cluster-54524.109968,Cluster-54524.104568,Cluster-54524.91381,Cluster-54524.101238,Cluster-54524.114686,Cluster-54524.93763,Cluster-54524.111221,Cluster-54524.134163,Cluster-54524.93816,Cluster-54524.110594,Cluster-54524.83906,Cluster-54524.109395,Cluster-54524.104569,Cluster-54524.95182,Cluster-54524.86746,Cluster-54524.111031
GO:0006518	peptide metabolic process	biological_process	3.6011e-06	0.00081981	Cluster-54524.93816,Cluster-54524.89109,Cluster-54524.134163,Cluster-54524.86746,Cluster-54524.112372,Cluster-54524.41672,Cluster-54524.54520,Cluster-54524.111380,Cluster-54524.56693,Cluster-54524.95182,Cluster-54524.79118,Cluster-54524.44961,Cluster-54524.92153,Cluster-54524.106185,Cluster-54524.136064,Cluster-54524.88699,Cluster-54524.114095,Cluster-54524.81202,Cluster-54524.103560,Cluster-5452…
GO:1901566	organonitrogen compound biosynthetic process	biological_process	3.9356e-06	0.00087802	Cluster-54524.111221,Cluster-54524.60769,Cluster-54524.40793,Cluster-54524.91381,Cluster-54524.84208,Cluster-54524.98368,Cluster-54524.96362,Cluster-54524.71916,Cluster-54524.79119,Cluster-54524.64692,Cluster-54524.115092,Cluster-54524.81538,Cluster-54524.109193,Cluster-54524.106724,Cluster-54524.110008,Cluster-54524.109395,Cluster-54524.77754,Cluster-54524.104569,Cluster-54524.100219,Cluster-545…
GO:0006412	translation	biological_process	4.1345e-06	0.00090433	Cluster-54524.126035,Cluster-54524.109968,Cluster-54524.101238,Cluster-54524.114686,Cluster-54524.110594,Cluster-54524.87440,Cluster-54524.94462,Cluster-54524.92969,Cluster-54524.79801,Cluster-54524.79119,Cluster-54524.96362,Cluster-54524.81538,Cluster-54524.109193,Cluster-54524.111221,Cluster-54524.60769,Cluster-54524.40793,Cluster-54524.91381,Cluster-54524.84208,Cluster-54524.98368,Cluster-5452…
GO:0043043	peptide biosynthetic process	biological_process	4.5176e-06	0.00096911	Cluster-54524.111031,Cluster-54524.81010,Cluster-54524.96571,Cluster-54524.79117,Cluster-54524.83906,Cluster-54524.85885,Cluster-54524.115241,Cluster-54524.124208,Cluster-54524.83165,Cluster-54524.102008,Cluster-54524.136571,Cluster-54524.98158,Cluster-54524.93763,Cluster-54524.98645,Cluster-54524.90712,Cluster-54524.94528,Cluster-54524.91125,Cluster-54524.105738,Cluster-54524.41672,Cluster-54524…
GO:0046487	glyoxylate metabolic process	biological_process	5.9609e-06	0.0012546	Cluster-54524.81301,Cluster-54524.98043,Cluster-54524.84332,Cluster-54524.90794,Cluster-54524.98916,Cluster-54524.98496,Cluster-54524.112541,Cluster-54524.52966,Cluster-54524.49804,Cluster-54524.53400,Cluster-54524.120474
GO:0003995	acyl-CoA dehydrogenase activity	molecular_function	6.3144e-06	0.0013044	Cluster-54524.111538,Cluster-54524.102140,Cluster-54524.115663,Cluster-54524.102141,Cluster-54524.103177,Cluster-54524.102139,Cluster-54524.104613,Cluster-54524.79598,Cluster-54524.76955
GO:0006739	NADP metabolic process	biological_process	7.1073e-06	0.0014415	Cluster-54524.114228,Cluster-54524.90971,Cluster-54524.81159,Cluster-54524.81160,Cluster-54524.97298,Cluster-54524.101511,Cluster-54524.92105,Cluster-54524.90507,Cluster-54524.115091,Cluster-54524.89939,Cluster-54524.102263,Cluster-54524.96555,Cluster-54524.40184,Cluster-54524.110666,Cluster-54524.105493
GO:0016836	hydro-lyase activity	molecular_function	8.8525e-06	0.0017634	Cluster-54524.64693,Cluster-54524.84800,Cluster-54524.89922,Cluster-54524.64692,Cluster-54524.114833,Cluster-54524.132835,Cluster-54524.110998,Cluster-54524.105694,Cluster-54524.86510,Cluster-54524.109506,Cluster-54524.102263,Cluster-54524.99579,Cluster-54524.122417,Cluster-54524.132470
GO:0019362	pyridine nucleotide metabolic process	biological_process	1.1649e-05	0.0022796	Cluster-54524.89922,Cluster-54524.97298,Cluster-54524.90971,Cluster-54524.81160,Cluster-54524.114228,Cluster-54524.40184,Cluster-54524.96555,Cluster-54524.87704,Cluster-54524.89939,Cluster-54524.101511,Cluster-54524.81159,Cluster-54524.88423,Cluster-54524.105493,Cluster-54524.91884,Cluster-54524.110666,Cluster-54524.102263,Cluster-54524.115091,Cluster-54524.90507,Cluster-54524.92105
GO:0072524	pyridine-containing compound metabolic process	biological_process	1.2795e-05	0.0024609	Cluster-54524.96555,Cluster-54524.87704,Cluster-54524.40184,Cluster-54524.89939,Cluster-54524.89922,Cluster-54524.97298,Cluster-54524.90971,Cluster-54524.81160,Cluster-54524.114228,Cluster-54524.105493,Cluster-54524.110666,Cluster-54524.91884,Cluster-54524.102263,Cluster-54524.92105,Cluster-54524.90507,Cluster-54524.115091,Cluster-54524.92097,Cluster-54524.101511,Cluster-54524.81159,Cluster-54524…
GO:0044238	primary metabolic process	biological_process	1.345e-05	0.0025429	Cluster-54524.76651,Cluster-54524.86735,Cluster-54524.79273,Cluster-54524.92842,Cluster-54524.103811,Cluster-54524.74480,Cluster-54524.117658,Cluster-54524.95182,Cluster-54524.129395,Cluster-54524.115054,Cluster-54524.91040,Cluster-54524.119454,Cluster-54524.92105,Cluster-54524.87977,Cluster-54524.40524,Cluster-54524.112372,Cluster-54524.88699,Cluster-54524.136064,Cluster-54524.114634,Cluster-545…
GO:0005524	ATP binding	molecular_function	1.502e-05	0.0027924	Cluster-54524.74719,Cluster-54524.91381,Cluster-54524.107380,Cluster-54524.111221,Cluster-54524.81185,Cluster-54524.41333,Cluster-54524.119812,Cluster-54524.113196,Cluster-54524.71555,Cluster-54524.40824,Cluster-54524.96362,Cluster-54524.93464,Cluster-54524.111403,Cluster-54524.89767,Cluster-54524.104569,Cluster-54524.109395,Cluster-54524.96617,Cluster-54524.70481,Cluster-54524.119110,Cluster-545…
GO:0032559	adenyl ribonucleotide binding	molecular_function	1.6242e-05	0.0029701	Cluster-54524.93763,Cluster-54524.65136,Cluster-54524.82492,Cluster-54524.75176,Cluster-54524.102650,Cluster-54524.40867,Cluster-54524.114942,Cluster-54524.81160,Cluster-54524.40274,Cluster-54524.114463,Cluster-54524.121485,Cluster-54524.98043,Cluster-54524.96484,Cluster-54524.91125,Cluster-54524.119813,Cluster-54524.89250,Cluster-54524.111031,Cluster-54524.41437,Cluster-54524.93778,Cluster-54524…
GO:0030554	adenyl nucleotide binding	molecular_function	2.4734e-05	0.0044502	Cluster-54524.110594,Cluster-54524.41480,Cluster-54524.41422,Cluster-54524.102006,Cluster-54524.93882,Cluster-54524.104387,Cluster-54524.104330,Cluster-54524.123680,Cluster-54524.95132,Cluster-54524.90571,Cluster-54524.92396,Cluster-54524.116428,Cluster-54524.99184,Cluster-54524.109968,Cluster-54524.78988,Cluster-54524.66531,Cluster-54524.132066,Cluster-54524.48198,Cluster-54524.118718,Cluster-54…
GO:0006399	tRNA metabolic process	biological_process	2.5766e-05	0.0045623	Cluster-54524.86746,Cluster-54524.95182,Cluster-54524.79319,Cluster-54524.93816,Cluster-54524.117658,Cluster-54524.110594,Cluster-54524.134163,Cluster-54524.76651,Cluster-54524.127703,Cluster-54524.100391,Cluster-54524.114686,Cluster-54524.101238,Cluster-54524.104568,Cluster-54524.90175,Cluster-54524.109968,Cluster-54524.87351,Cluster-54524.91323,Cluster-54524.92153,Cluster-54524.113246,Cluster-5…
GO:0042430	indole-containing compound metabolic process	biological_process	2.7064e-05	0.0047172	Cluster-54524.98906,Cluster-54524.89922,Cluster-54524.83906,Cluster-54524.54400,Cluster-54524.109968,Cluster-54524.89623,Cluster-54524.102263,Cluster-54524.98496,Cluster-54524.93763,Cluster-54524.86377,Cluster-54524.105493,Cluster-54524.53400,Cluster-54524.132525,Cluster-54524.112805
GO:0071704	organic substance metabolic process	biological_process	3.9886e-05	0.006845	Cluster-54524.53400,Cluster-54524.87704,Cluster-54524.103560,Cluster-54524.108111,Cluster-54524.86660,Cluster-54524.110009,Cluster-54524.72024,Cluster-54524.76878,Cluster-54524.107010,Cluster-54524.136478,Cluster-54524.88813,Cluster-54524.92153,Cluster-54524.102075,Cluster-54524.100362,Cluster-54524.76804,Cluster-54524.114228,Cluster-54524.134239,Cluster-54524.92340,Cluster-54524.86746,Cluster-54…
GO:0016835	carbon-oxygen lyase activity	molecular_function	4.2472e-05	0.0070738	Cluster-54524.64693,Cluster-54524.84800,Cluster-54524.89922,Cluster-54524.132835,Cluster-54524.110998,Cluster-54524.105694,Cluster-54524.86510,Cluster-54524.114833,Cluster-54524.64692,Cluster-54524.109506,Cluster-54524.122417,Cluster-54524.132687,Cluster-54524.132470,Cluster-54524.99579,Cluster-54524.102263
GO:0019725	cellular homeostasis	biological_process	4.2686e-05	0.0070738	Cluster-54524.121358,Cluster-54524.81053,Cluster-54524.84693,Cluster-54524.61990,Cluster-54524.92944,Cluster-54524.90914,Cluster-54524.49186,Cluster-54524.41422,Cluster-54524.93816,Cluster-54524.96398,Cluster-54524.106268,Cluster-54524.94622,Cluster-54524.84415,Cluster-54524.102178,Cluster-54524.108368,Cluster-54524.98870,Cluster-54524.134638,Cluster-54524.126035,Cluster-54524.107727,Cluster-5452…
GO:0006520	cellular amino acid metabolic process	biological_process	4.3121e-05	0.0070738	Cluster-54524.93816,Cluster-54524.76651,Cluster-54524.134163,Cluster-54524.87797,Cluster-54524.76843,Cluster-54524.105493,Cluster-54524.86746,Cluster-54524.96670,Cluster-54524.95182,Cluster-54524.115054,Cluster-54524.136478,Cluster-54524.92153,Cluster-54524.88813,Cluster-54524.76804,Cluster-54524.91114,Cluster-54524.53400,Cluster-54524.112805,Cluster-54524.49804,Cluster-54524.104568,Cluster-54524…
GO:0044281	small molecule metabolic process	biological_process	4.6054e-05	0.0074453	Cluster-54524.119454,Cluster-54524.92105,Cluster-54524.115054,Cluster-54524.95182,Cluster-54524.87797,Cluster-54524.76651,Cluster-54524.108570,Cluster-54524.93816,Cluster-54524.104568,Cluster-54524.109285,Cluster-54524.90175,Cluster-54524.52966,Cluster-54524.40184,Cluster-54524.91114,Cluster-54524.103941,Cluster-54524.93600,Cluster-54524.84800,Cluster-54524.120474,Cluster-54524.109057,Cluster-545…
GO:0034754	cellular hormone metabolic process	biological_process	6.1947e-05	0.0098716	Cluster-54524.54400,Cluster-54524.93568,Cluster-54524.64326,Cluster-54524.101282,Cluster-54524.93956,Cluster-54524.93234,Cluster-54524.115054,Cluster-54524.89748
GO:0035639	purine ribonucleoside triphosphate binding	molecular_function	6.7576e-05	0.010191	Cluster-54524.96362,Cluster-54524.40824,Cluster-54524.111403,Cluster-54524.93464,Cluster-54524.81185,Cluster-54524.111221,Cluster-54524.107380,Cluster-54524.91381,Cluster-54524.74719,Cluster-54524.71555,Cluster-54524.84208,Cluster-54524.113196,Cluster-54524.41333,Cluster-54524.119812,Cluster-54524.104891,Cluster-54524.89282,Cluster-54524.116900,Cluster-54524.58053,Cluster-54524.105114,Cluster-545…
GO:0006568	tryptophan metabolic process	biological_process	7.0313e-05	0.010191	Cluster-54524.98496,Cluster-54524.93763,Cluster-54524.102263,Cluster-54524.86377,Cluster-54524.53400,Cluster-54524.105493,Cluster-54524.112805,Cluster-54524.98906,Cluster-54524.89922,Cluster-54524.83906,Cluster-54524.54400,Cluster-54524.89623,Cluster-54524.109968
GO:0006586	indolalkylamine metabolic process	biological_process	7.0313e-05	0.010191	Cluster-54524.112805,Cluster-54524.105493,Cluster-54524.53400,Cluster-54524.86377,Cluster-54524.102263,Cluster-54524.93763,Cluster-54524.98496,Cluster-54524.89623,Cluster-54524.54400,Cluster-54524.109968,Cluster-54524.89922,Cluster-54524.83906,Cluster-54524.98906
GO:0001883	purine nucleoside binding	molecular_function	7.0375e-05	0.010191	Cluster-54524.78988,Cluster-54524.109968,Cluster-54524.99184,Cluster-54524.66531,Cluster-54524.89062,Cluster-54524.132066,Cluster-54524.48198,Cluster-54524.114686,Cluster-54524.100391,Cluster-54524.101238,Cluster-54524.118718,Cluster-54524.102006,Cluster-54524.41480,Cluster-54524.41422,Cluster-54524.110594,Cluster-54524.102178,Cluster-54524.104387,Cluster-54524.93882,Cluster-54524.123680,Cluster-…
GO:0032550	purine ribonucleoside binding	molecular_function	7.0375e-05	0.010191	Cluster-54524.89062,Cluster-54524.132066,Cluster-54524.66531,Cluster-54524.78988,Cluster-54524.99184,Cluster-54524.109968,Cluster-54524.101238,Cluster-54524.114686,Cluster-54524.100391,Cluster-54524.118718,Cluster-54524.48198,Cluster-54524.102178,Cluster-54524.104387,Cluster-54524.93882,Cluster-54524.102006,Cluster-54524.41422,Cluster-54524.41480,Cluster-54524.110594,Cluster-54524.92969,Cluster-5…
GO:0032549	ribonucleoside binding	molecular_function	7.0606e-05	0.010191	Cluster-54524.40867,Cluster-54524.102650,Cluster-54524.90530,Cluster-54524.89548,Cluster-54524.114942,Cluster-54524.93763,Cluster-54524.65136,Cluster-54524.75176,Cluster-54524.82492,Cluster-54524.96484,Cluster-54524.91125,Cluster-54524.119813,Cluster-54524.81160,Cluster-54524.40274,Cluster-54524.114463,Cluster-54524.121485,Cluster-54524.98043,Cluster-54524.111031,Cluster-54524.41437,Cluster-54524…
GO:1901576	organic substance biosynthetic process	biological_process	7.126e-05	0.010191	Cluster-54524.74948,Cluster-54524.102178,Cluster-54524.105641,Cluster-54524.115685,Cluster-54524.65469,Cluster-54524.89623,Cluster-54524.87440,Cluster-54524.94233,Cluster-54524.90451,Cluster-54524.84332,Cluster-54524.110594,Cluster-54524.107833,Cluster-54524.90571,Cluster-54524.96638,Cluster-54524.92969,Cluster-54524.89748,Cluster-54524.112541,Cluster-54524.94462,Cluster-54524.45290,Cluster-54524…
GO:0032555	purine ribonucleotide binding	molecular_function	7.4789e-05	0.01056	Cluster-54524.132814,Cluster-54524.89596,Cluster-54524.97890,Cluster-54524.49084,Cluster-54524.99455,Cluster-54524.118500,Cluster-54524.92153,Cluster-54524.127703,Cluster-54524.40184,Cluster-54524.74902,Cluster-54524.97294,Cluster-54524.91626,Cluster-54524.72024,Cluster-54524.104568,Cluster-54524.106679,Cluster-54524.93816,Cluster-54524.117658,Cluster-54524.48524,Cluster-54524.57418,Cluster-54524…
GO:0001882	nucleoside binding	molecular_function	7.5899e-05	0.010583	Cluster-54524.78559,Cluster-54524.112530,Cluster-54524.86746,Cluster-54524.104228,Cluster-54524.119443,Cluster-54524.95182,Cluster-54524.48524,Cluster-54524.93816,Cluster-54524.117658,Cluster-54524.76651,Cluster-54524.81159,Cluster-54524.91671,Cluster-54524.57418,Cluster-54524.106678,Cluster-54524.86735,Cluster-54524.134163,Cluster-54524.74902,Cluster-54524.97294,Cluster-54524.127703,Cluster-5452…
GO:0016667	oxidoreductase activity, acting on a sulfur group of donors	molecular_function	8.1714e-05	0.011253	Cluster-54524.90914,Cluster-54524.77980,Cluster-63885.0,Cluster-54524.76843,Cluster-54524.84693,Cluster-54524.119626,Cluster-54524.57292,Cluster-54524.84415,Cluster-54524.106268,Cluster-54524.94622,Cluster-54524.49186,Cluster-54524.93816,Cluster-54524.98870,Cluster-54524.72597,Cluster-54524.92313,Cluster-54524.134638,Cluster-54524.107727,Cluster-54524.91125
GO:0046496	nicotinamide nucleotide metabolic process	biological_process	8.395e-05	0.01142	Cluster-54524.81159,Cluster-54524.101511,Cluster-54524.102263,Cluster-54524.92105,Cluster-54524.115091,Cluster-54524.90507,Cluster-54524.105493,Cluster-54524.110666,Cluster-54524.90971,Cluster-54524.81160,Cluster-54524.114228,Cluster-54524.89922,Cluster-54524.97298,Cluster-54524.89939,Cluster-54524.40184,Cluster-54524.96555,Cluster-54524.87704
GO:0006576	cellular biogenic amine metabolic process	biological_process	8.4987e-05	0.011422	Cluster-54524.109968,Cluster-54524.89922,Cluster-54524.40824,Cluster-54524.118500,Cluster-54524.98906,Cluster-54524.112805,Cluster-54524.127703,Cluster-54524.114942,Cluster-54524.53400,Cluster-54524.86377,Cluster-54524.93763,Cluster-54524.98496,Cluster-54524.54400,Cluster-54524.41422,Cluster-54524.89623,Cluster-54524.83906,Cluster-54524.105493,Cluster-54524.102263
GO:0032553	ribonucleotide binding	molecular_function	9.4245e-05	0.012515	Cluster-54524.93464,Cluster-54524.111403,Cluster-54524.40824,Cluster-54524.96362,Cluster-54524.119812,Cluster-54524.41333,Cluster-54524.113196,Cluster-54524.84208,Cluster-54524.71555,Cluster-54524.91381,Cluster-54524.74719,Cluster-54524.107380,Cluster-54524.81185,Cluster-54524.111221,Cluster-54524.114564,Cluster-54524.101932,Cluster-54524.92495,Cluster-54524.105114,Cluster-54524.92097,Cluster-545…
GO:0017076	purine nucleotide binding	molecular_function	0.00011264	0.014782	Cluster-54524.112530,Cluster-54524.78559,Cluster-54524.86746,Cluster-54524.104228,Cluster-54524.95182,Cluster-54524.119443,Cluster-54524.48524,Cluster-54524.117658,Cluster-54524.93816,Cluster-54524.81159,Cluster-54524.76651,Cluster-54524.91671,Cluster-54524.86735,Cluster-54524.134163,Cluster-54524.57418,Cluster-54524.106678,Cluster-54524.97294,Cluster-54524.74902,Cluster-54524.40184,Cluster-54524…
GO:0008250	oligosaccharyltransferase complex	cellular_component	0.00011547	0.014953	Cluster-54524.87791,Cluster-54524.93404,Cluster-54524.101098,Cluster-54524.92842,Cluster-54524.96268,Cluster-54524.96271
GO:0044106	cellular amine metabolic process	biological_process	0.00011662	0.014953	Cluster-54524.105493,Cluster-54524.102263,Cluster-54524.89623,Cluster-54524.54400,Cluster-54524.41422,Cluster-54524.83906,Cluster-54524.112805,Cluster-54524.127703,Cluster-54524.114942,Cluster-54524.53400,Cluster-54524.86377,Cluster-54524.98496,Cluster-54524.93763,Cluster-54524.109968,Cluster-54524.89922,Cluster-54524.40824,Cluster-54524.118500,Cluster-54524.98906
GO:0042592	homeostatic process	biological_process	0.00012471	0.015725	Cluster-54524.41422,Cluster-54524.49186,Cluster-54524.93816,Cluster-54524.94490,Cluster-54524.102178,Cluster-54524.106268,Cluster-54524.94622,Cluster-54524.84415,Cluster-54524.96398,Cluster-54524.92944,Cluster-54524.81053,Cluster-54524.61990,Cluster-54524.84693,Cluster-54524.121358,Cluster-54524.95987,Cluster-54524.90914,Cluster-54524.102774,Cluster-54524.91125,Cluster-54524.126035,Cluster-54524.…
GO:0003854	3-beta-hydroxy-delta5-steroid dehydrogenase activity	molecular_function	0.0001262	0.015725	Cluster-54524.93956,Cluster-54524.101282,Cluster-54524.64326,Cluster-54524.54400,Cluster-54524.89748,Cluster-54524.93568,Cluster-54524.115054
GO:0006549	isoleucine metabolic process	biological_process	0.00012828	0.015725	Cluster-54524.54400,Cluster-54524.89623,Cluster-54524.98906,Cluster-54524.105493,Cluster-54524.53400,Cluster-54524.50052,Cluster-54524.102263,Cluster-54524.111221,Cluster-54524.86377
GO:0006573	valine metabolic process	biological_process	0.00012828	0.015725	Cluster-54524.98906,Cluster-54524.89623,Cluster-54524.54400,Cluster-54524.86377,Cluster-54524.102263,Cluster-54524.111221,Cluster-54524.50052,Cluster-54524.105493,Cluster-54524.53400
GO:0006629	lipid metabolic process	biological_process	0.00014267	0.017226	Cluster-54524.98906,Cluster-54524.100404,Cluster-54524.101159,Cluster-54524.122417,Cluster-54524.86377,Cluster-54524.93234,Cluster-54524.102023,Cluster-54524.113196,Cluster-54524.136484,Cluster-54524.86499,Cluster-54524.64326,Cluster-54524.93568,Cluster-54524.104752,Cluster-54524.107277,Cluster-54524.76805,Cluster-54524.103596,Cluster-54524.54400,Cluster-54524.102263,Cluster-54524.101615,Cluster-…
GO:0008209	androgen metabolic process	biological_process	0.00014362	0.017226	Cluster-54524.64326,Cluster-54524.54400,Cluster-54524.101282,Cluster-54524.93956,Cluster-54524.93568,Cluster-54524.115054,Cluster-54524.89748
GO:0042445	hormone metabolic process	biological_process	0.00015292	0.018147	Cluster-54524.115054,Cluster-54524.93234,Cluster-54524.89748,Cluster-54524.64326,Cluster-54524.101282,Cluster-54524.93956,Cluster-54524.93568,Cluster-54524.54400
GO:0008210	estrogen metabolic process	biological_process	0.00016899	0.019844	Cluster-54524.54400,Cluster-54524.64326,Cluster-54524.93956,Cluster-54524.101282,Cluster-54524.115054,Cluster-54524.93568,Cluster-54524.89748
GO:0004488	methylenetetrahydrofolate dehydrogenase (NADP+) activity	molecular_function	0.00017288	0.019909	Cluster-54524.112541,Cluster-54524.49804,Cluster-54524.81301,Cluster-54524.98043,Cluster-54524.90794,Cluster-54524.53400,Cluster-54524.84332
GO:0016229	steroid dehydrogenase activity	molecular_function	0.00017491	0.019909	Cluster-54524.64326,Cluster-54524.54400,Cluster-54524.101282,Cluster-54524.93956,Cluster-54524.93568,Cluster-54524.115054,Cluster-54524.89748
GO:0033764	steroid dehydrogenase activity, acting on the CH-OH group of donors, NAD or NADP as acceptor	molecular_function	0.00017491	0.019909	Cluster-54524.93568,Cluster-54524.115054,Cluster-54524.89748,Cluster-54524.54400,Cluster-54524.64326,Cluster-54524.101282,Cluster-54524.93956
GO:0009877	nodulation	biological_process	0.00020641	0.023257	Cluster-54524.108833,Cluster-54524.108832,Cluster-54524.91064,Cluster-54524.57359,Cluster-54524.134366,Cluster-54524.113565,Cluster-54524.87351,Cluster-54524.82607,Cluster-54524.48208
GO:1901135	carbohydrate derivative metabolic process	biological_process	0.00021749	0.024261	Cluster-54524.114683,Cluster-54524.70481,Cluster-54524.132525,Cluster-54524.105205,Cluster-54524.87791,Cluster-54524.90507,Cluster-54524.102263,Cluster-54524.101932,Cluster-54524.103596,Cluster-54524.89282,Cluster-54524.101354,Cluster-54524.104891,Cluster-54524.90344,Cluster-54524.94806,Cluster-54524.95927,Cluster-54524.115636,Cluster-54524.71916,Cluster-54524.107654,Cluster-54524.110666,Cluster-…
GO:0006551	leucine metabolic process	biological_process	0.00023705	0.026067	Cluster-54524.89623,Cluster-54524.54400,Cluster-54524.98906,Cluster-54524.105493,Cluster-54524.53400,Cluster-54524.50052,Cluster-54524.102263,Cluster-54524.111221,Cluster-54524.86377
GO:0008207	C21-steroid hormone metabolic process	biological_process	0.00023835	0.026067	Cluster-54524.115054,Cluster-54524.93568,Cluster-54524.89748,Cluster-54524.64326,Cluster-54524.54400,Cluster-54524.101282,Cluster-54524.93956
GO:0006487	protein N-linked glycosylation	biological_process	0.00024365	0.026388	Cluster-54524.96271,Cluster-54524.92842,Cluster-54524.96268,Cluster-54524.93404,Cluster-54524.87791,Cluster-54524.91527
GO:0009308	amine metabolic process	biological_process	0.00026192	0.028094	Cluster-54524.102263,Cluster-54524.105493,Cluster-54524.89623,Cluster-54524.54400,Cluster-54524.41422,Cluster-54524.83906,Cluster-54524.86377,Cluster-54524.93763,Cluster-54524.98496,Cluster-54524.114942,Cluster-54524.127703,Cluster-54524.112805,Cluster-54524.53400,Cluster-54524.40824,Cluster-54524.98906,Cluster-54524.118500,Cluster-54524.109968,Cluster-54524.89922
GO:0006550	isoleucine catabolic process	biological_process	0.00030363	0.031654	Cluster-54524.54400,Cluster-54524.89623,Cluster-54524.98906,Cluster-54524.50052,Cluster-54524.105493,Cluster-54524.53400,Cluster-54524.86377,Cluster-54524.102263
GO:0006552	leucine catabolic process	biological_process	0.00030363	0.031654	Cluster-54524.98906,Cluster-54524.54400,Cluster-54524.89623,Cluster-54524.86377,Cluster-54524.102263,Cluster-54524.50052,Cluster-54524.105493,Cluster-54524.53400
GO:0006574	valine catabolic process	biological_process	0.00030363	0.031654	Cluster-54524.89623,Cluster-54524.54400,Cluster-54524.98906,Cluster-54524.53400,Cluster-54524.105493,Cluster-54524.50052,Cluster-54524.102263,Cluster-54524.86377
GO:0016646	oxidoreductase activity, acting on the CH-NH group of donors, NAD or NADP as acceptor	molecular_function	0.00032099	0.032891	Cluster-54524.96670,Cluster-54524.112541,Cluster-54524.49804,Cluster-54524.53400,Cluster-54524.98043,Cluster-54524.81301,Cluster-54524.84332,Cluster-54524.90794
GO:0042254	ribosome biogenesis	biological_process	0.00032166	0.032891	Cluster-54524.103560,Cluster-54524.81202,Cluster-54524.114095,Cluster-54524.91047,Cluster-54524.110009,Cluster-54524.126035,Cluster-54524.79118,Cluster-54524.88699,Cluster-54524.10932,Cluster-54524.44961,Cluster-54524.92340,Cluster-54524.41672,Cluster-54524.111380,Cluster-54524.54520,Cluster-54524.79801,Cluster-54524.56693,Cluster-54524.94462,Cluster-54524.87440,Cluster-54524.119622,Cluster-54524…
GO:0009083	branched-chain amino acid catabolic process	biological_process	0.00032434	0.032891	Cluster-54524.50052,Cluster-54524.105493,Cluster-54524.53400,Cluster-54524.86377,Cluster-54524.102263,Cluster-54524.54400,Cluster-54524.89623,Cluster-54524.98906
GO:0097367	carbohydrate derivative binding	molecular_function	0.00034084	0.034253	Cluster-54524.118718,Cluster-54524.101238,Cluster-54524.114686,Cluster-54524.100391,Cluster-54524.116439,Cluster-54524.48198,Cluster-54524.132066,Cluster-54524.89062,Cluster-54524.66531,Cluster-54524.109968,Cluster-54524.99184,Cluster-54524.78988,Cluster-54524.95132,Cluster-54524.115336,Cluster-54524.90571,Cluster-54524.92396,Cluster-54524.92969,Cluster-54524.116428,Cluster-54524.104330,Cluster-5…
GO:0010817	regulation of hormone levels	biological_process	0.00035306	0.035164	Cluster-54524.93568,Cluster-54524.54400,Cluster-54524.115054,Cluster-54524.93234,Cluster-54524.89748,Cluster-54524.64326,Cluster-54524.101282,Cluster-54524.93956
GO:0003857	3-hydroxyacyl-CoA dehydrogenase activity	molecular_function	0.00040789	0.040266	Cluster-54524.89623,Cluster-54524.54400,Cluster-54524.105493,Cluster-54524.53400,Cluster-54524.86377,Cluster-54524.102263,Cluster-54524.98906
GO:0016684	oxidoreductase activity, acting on peroxide as acceptor	molecular_function	0.00043654	0.042716	Cluster-54524.94038,Cluster-54524.89109,Cluster-54524.87052,Cluster-54524.94063,Cluster-54524.120649,Cluster-54524.112805,Cluster-54524.110756,Cluster-54524.88917,Cluster-54524.113389
GO:0005840	ribosome	cellular_component	0.00045644	0.044275	Cluster-54524.81538,Cluster-54524.79119,Cluster-54524.105738,Cluster-54524.90712,Cluster-54524.94528,Cluster-54524.98645,Cluster-54524.109193,Cluster-54524.60769,Cluster-54524.40793,Cluster-54524.98368,Cluster-54524.84208,Cluster-54524.136571,Cluster-54524.98158,Cluster-54524.102008,Cluster-54524.119101,Cluster-54524.83165,Cluster-54524.88296,Cluster-54524.115241,Cluster-54524.124208,Cluster-5452…
GO:0044262	cellular carbohydrate metabolic process	biological_process	0.00048923	0.047047	Cluster-54524.120474,Cluster-54524.50967,Cluster-54524.110666,Cluster-54524.89480,Cluster-54524.105493,Cluster-54524.115091,Cluster-54524.92105,Cluster-54524.102263,Cluster-54524.101511,Cluster-54524.81159,Cluster-54524.82946,Cluster-54524.40184,Cluster-54524.96555,Cluster-54524.89939,Cluster-54524.52966,Cluster-54524.98916,Cluster-54524.114228,Cluster-54524.70928,Cluster-54524.81160,Cluster-5452…
GO:0016903	oxidoreductase activity, acting on the aldehyde or oxo group of donors	molecular_function	0.00050868	0.048498	Cluster-54524.100402,Cluster-54524.90409,Cluster-54524.81362,Cluster-54524.67488,Cluster-54524.81361,Cluster-54524.110666,Cluster-54524.64326,Cluster-54524.80630,Cluster-54524.93234,Cluster-54524.89506
D vs E DOWN
GO:0042302	structural constituent of cuticle	molecular_function	1.058e-34	1.1802e-30	Cluster-54524.89589,Cluster-54524.89484,Cluster-54524.86796,Cluster-54524.88973,Cluster-54524.89128,Cluster-54524.89950,Cluster-75945.1,Cluster-54524.78700,Cluster-54524.66714,Cluster-54524.89429,Cluster-54524.89346,Cluster-54524.93202,Cluster-54524.90058,Cluster-54524.58958,Cluster-54524.62972,Cluster-54524.101301,Cluster-54524.89205,Cluster-54524.95643,Cluster-54524.90165,Cluster-54524.89184,Cl…
GO:0006030	chitin metabolic process	biological_process	1.2218e-11	5.0378e-08	Cluster-54524.89260,Cluster-54524.97325,Cluster-54524.92161,Cluster-54524.130159,Cluster-54524.87535,Cluster-54524.86200,Cluster-54524.89629,Cluster-54524.89333,Cluster-54524.90197,Cluster-54524.89860,Cluster-54524.90000,Cluster-54524.89703,Cluster-54524.94088,Cluster-54524.89591,Cluster-54524.95448,Cluster-54524.90519,Cluster-54524.90518,Cluster-54524.89884,Cluster-54524.92352,Cluster-54524.8937…
GO:1901071	glucosamine-containing compound metabolic process	biological_process	1.3549e-11	5.0378e-08	Cluster-54524.94088,Cluster-54524.89703,Cluster-54524.90000,Cluster-54524.89860,Cluster-54524.90197,Cluster-54524.89333,Cluster-54524.89629,Cluster-54524.87535,Cluster-54524.130159,Cluster-54524.86200,Cluster-54524.92161,Cluster-54524.97325,Cluster-54524.89260,Cluster-54524.92444,Cluster-54524.89371,Cluster-54524.92352,Cluster-54524.89884,Cluster-54524.90518,Cluster-54524.90519,Cluster-54524.9544…
GO:0008061	chitin binding	molecular_function	3.8943e-11	1.086e-07	Cluster-54524.90518,Cluster-54524.90519,Cluster-54524.89591,Cluster-54524.89371,Cluster-54524.92444,Cluster-54524.89884,Cluster-54524.92352,Cluster-54524.90094,Cluster-54524.89629,Cluster-54524.130159,Cluster-54524.87535,Cluster-54524.86200,Cluster-54524.92161,Cluster-54524.97325,Cluster-54524.89260,Cluster-54524.94088,Cluster-54524.89703,Cluster-54524.90000,Cluster-54524.89860,Cluster-54524.9019…
GO:0006040	amino sugar metabolic process	biological_process	2.7592e-10	6.1558e-07	Cluster-54524.94088,Cluster-54524.90000,Cluster-54524.89703,Cluster-54524.89860,Cluster-54524.90197,Cluster-54524.89333,Cluster-54524.89629,Cluster-54524.130159,Cluster-54524.87535,Cluster-54524.86200,Cluster-54524.97325,Cluster-54524.92161,Cluster-54524.89260,Cluster-54524.92444,Cluster-54524.89371,Cluster-54524.92352,Cluster-54524.89884,Cluster-54524.90519,Cluster-54524.90518,Cluster-54524.9544…
GO:0004435	phosphatidylinositol phospholipase C activity	molecular_function	1.0535e-07	0.00016789	Cluster-54524.122111,Cluster-54524.106996,Cluster-54524.85085,Cluster-54524.106997,Cluster-54524.102256,Cluster-54524.108557,Cluster-54524.85086
GO:0046339	diacylglycerol metabolic process	biological_process	1.0535e-07	0.00016789	Cluster-54524.122111,Cluster-54524.106997,Cluster-54524.85085,Cluster-54524.106996,Cluster-54524.108557,Cluster-54524.102256,Cluster-54524.85086
GO:0004629	phospholipase C activity	molecular_function	4.938e-07	0.00068854	Cluster-54524.122111,Cluster-54524.106997,Cluster-54524.85085,Cluster-54524.106996,Cluster-54524.85086,Cluster-54524.108557,Cluster-54524.102256
GO:0003951	NAD+ kinase activity	molecular_function	7.4555e-07	0.00083166	Cluster-54524.72490,Cluster-54524.119786,Cluster-54524.62188,Cluster-54524.72491
GO:0006741	NADP biosynthetic process	biological_process	7.4555e-07	0.00083166	Cluster-54524.72491,Cluster-54524.72490,Cluster-54524.119786,Cluster-54524.62188
GO:0006022	aminoglycan metabolic process	biological_process	1.4262e-06	0.0014463	Cluster-54524.89629,Cluster-54524.87535,Cluster-54524.130159,Cluster-54524.86200,Cluster-54524.92161,Cluster-54524.97325,Cluster-54524.89260,Cluster-54524.94088,Cluster-54524.89703,Cluster-54524.90000,Cluster-54524.89860,Cluster-54524.90197,Cluster-54524.89333,Cluster-54524.90518,Cluster-54524.90519,Cluster-54524.95448,Cluster-54524.89591,Cluster-54524.89371,Cluster-54524.92444,Cluster-54524.8988…
GO:0006638	neutral lipid metabolic process	biological_process	3.2693e-06	0.0026239	Cluster-54524.106996,Cluster-54524.85085,Cluster-54524.106997,Cluster-54524.122111,Cluster-54524.108557,Cluster-54524.85086,Cluster-54524.102256
GO:0006639	acylglycerol metabolic process	biological_process	3.2693e-06	0.0026239	Cluster-54524.106997,Cluster-54524.85085,Cluster-54524.106996,Cluster-54524.122111,Cluster-54524.102256,Cluster-54524.108557,Cluster-54524.85086
GO:0004026	alcohol O-acetyltransferase activity	molecular_function	3.5284e-06	0.0026239	Cluster-54524.66378,Cluster-54524.66593,Cluster-54524.66381,Cluster-54524.66380,Cluster-54524.121240,Cluster-54524.64414
GO:0034318	alcohol O-acyltransferase activity	molecular_function	3.5284e-06	0.0026239	Cluster-54524.64414,Cluster-54524.121240,Cluster-54524.66380,Cluster-54524.66381,Cluster-54524.66593,Cluster-54524.66378
GO:0016413	O-acetyltransferase activity	molecular_function	5.1105e-06	0.003563	Cluster-54524.66381,Cluster-54524.66380,Cluster-54524.66378,Cluster-54524.66593,Cluster-54524.121240,Cluster-54524.64414
GO:0004620	phospholipase activity	molecular_function	8.6665e-06	0.0056867	Cluster-54524.108557,Cluster-54524.122111,Cluster-54524.85085,Cluster-54524.106997,Cluster-54524.106996,Cluster-54524.119589,Cluster-54524.102256,Cluster-54524.85086
GO:0052636	arabinosyltransferase activity	molecular_function	1.9816e-05	0.011634	Cluster-54524.85459,Cluster-54524.97377,Cluster-54524.90512,Cluster-54524.100214
GO:0071766	Actinobacterium-type cell wall biogenesis	biological_process	1.9816e-05	0.011634	Cluster-54524.90512,Cluster-54524.97377,Cluster-54524.85459,Cluster-54524.100214
GO:0005198	structural molecule activity	molecular_function	3.7466e-05	0.020897	Cluster-54524.89205,Cluster-54524.95000,Cluster-54524.62972,Cluster-54524.58958,Cluster-54524.90058,Cluster-54524.90613,Cluster-54524.92287,Cluster-75945.1,Cluster-54524.89128,Cluster-54524.89484,Cluster-54524.89589,Cluster-54524.89337,Cluster-54524.84681,Cluster-54524.87610,Cluster-54524.89100,Cluster-54524.89234,Cluster-54524.119859,Cluster-54524.97491,Cluster-54524.89303,Cluster-54524.99966,Cl…
GO:0009395	phospholipid catabolic process	biological_process	4.0048e-05	0.021273	Cluster-54524.108557,Cluster-54524.119589,Cluster-54524.102256,Cluster-54524.85086,Cluster-54524.122111,Cluster-54524.106996,Cluster-54524.106997,Cluster-54524.85085
GO:0016298	lipase activity	molecular_function	7.1377e-05	0.035329	Cluster-54524.85086,Cluster-54524.102256,Cluster-54524.119589,Cluster-54524.122111,Cluster-54524.106996,Cluster-54524.85085,Cluster-54524.106997,Cluster-54524.108557
GO:0016773	phosphotransferase activity, alcohol group as acceptor	molecular_function	7.2844e-05	0.035329	Cluster-54524.119811,Cluster-54524.113720,Cluster-54524.72490,Cluster-54524.82588,Cluster-54524.87628,Cluster-54524.99726,Cluster-54524.64234,Cluster-54524.116440,Cluster-54524.104528,Cluster-54524.121387,Cluster-54524.97264,Cluster-54524.95688,Cluster-54524.96128,Cluster-54524.73890,Cluster-54524.100317,Cluster-54524.109811,Cluster-54524.72491,Cluster-54524.93825,Cluster-54524.123134,Cluster-545…
GO:0005136	interleukin-4 receptor binding	molecular_function	7.9814e-05	0.035613	Cluster-54524.121532,Cluster-54524.121533,Cluster-54524.79591
GO:0016516	interleukin-4 receptor complex	cellular_component	7.9814e-05	0.035613	Cluster-54524.121532,Cluster-54524.121533,Cluster-54524.79591
