# Supplementary material for: Transcriptomic analysis of gills provides insights into the molecular basis of molting in Chinese mitten crab (Eriocheir sinensis)
Source: PeerJ. 2019 Jun 28;7:e7182. doi: 10.7717/peerj.7182 (PMC6601604; doi:10.7717/peerj.7182)
Supplement: Table S2 [file peerj-07-7182-s006.xlsx]

## Sheet: EGi_AvsEGi_C_up.DEG_KEGG_pathwa
##Databases: KEGG PATHWAY
##Statistical test method: hypergeometric test / Fisher's exact test
##FDR correction method: Benjamini and Hochberg
#Term	Database	ID	Input number	Background number	P-Value	Corrected P-Value	Input	Hyperlink
A vs C UP
Fatty acid elongation	KEGG PATHWAY	ko00062	7	81	7.26e-06	0.00140903	Cluster-54524.121287|Cluster-54524.120848|Cluster-54524.122454|Cluster-54524.89039|Cluster-54524.111505|Cluster-54524.90023|Cluster-54524.99674	http://www.genome.jp/kegg-bin/show_pathway?ko00062/K10203%09red/K10250%09red
Phosphatidylinositol signaling system	KEGG PATHWAY	ko04070	9	240	0.000200738	0.0194716	Cluster-54524.89782|Cluster-54524.78598|Cluster-54524.85085|Cluster-54524.66489|Cluster-54524.90392|Cluster-54524.64238|Cluster-54524.122192|Cluster-54524.92774|Cluster-54524.73890	http://www.genome.jp/kegg-bin/show_pathway?ko04070/K02677%09red/K10572%09red/K13711%09red/K00901%09red/K13024%09red/K02183%09red/K05858%09red
A vs C DOWN
Glycolysis / Gluconeogenesis	KEGG PATHWAY	ko00010	23	286	4.00725e-10	9.85783e-08	Cluster-54524.89939|Cluster-54524.78588|Cluster-54524.110163|Cluster-54524.115048|Cluster-54524.89246|Cluster-54524.92245|Cluster-54524.93234|Cluster-54524.105764|Cluster-54524.91140|Cluster-54524.111298|Cluster-54524.89922|Cluster-54524.111538|Cluster-54524.75884|Cluster-54524.75883|Cluster-54524.97210|Cluster-54524.89548|Cluster-54524.95001|Cluster-54524.82554|Cluster-54524.90470|Cluster-54524.…	http://www.genome.jp/kegg-bin/show_pathway?ko00010/K01596%09red/K01803%09red/K01689%09red/K01835%09red/K01834%09red/K00149%09red/K00927%09red/K00128%09red/K00129%09red/K01623%09red/K01810%09red/K00121%09red/K00627%09red/K00016%09red
Pyruvate metabolism	KEGG PATHWAY	ko00620	14	183	1.81116e-06	0.000222772	Cluster-54524.105764|Cluster-54524.90470|Cluster-54524.115048|Cluster-54524.89548|Cluster-54524.90530|Cluster-54524.91140|Cluster-54524.101481|Cluster-54524.70132|Cluster-54524.86795|Cluster-54524.93234|Cluster-54524.82554|Cluster-54524.104847|Cluster-54524.95001|Cluster-54524.46256	http://www.genome.jp/kegg-bin/show_pathway?ko00620/K01596%09red/K00049%09red/K00149%09red/K01759%09red/K00128%09red/K00029%09red/K00627%09red/K00016%09red
Metabolism of xenobiotics by cytochrome P450	KEGG PATHWAY	ko00980	12	156	9.25892e-06	0.000759231	Cluster-54524.90944|Cluster-54524.111298|Cluster-54524.99703|Cluster-54524.99702|Cluster-54524.97210|Cluster-54524.104673|Cluster-54524.92250|Cluster-54524.111538|Cluster-54524.102248|Cluster-54524.131665|Cluster-54524.101414|Cluster-54524.107727	http://www.genome.jp/kegg-bin/show_pathway?ko00980/K13299%09red/K00078%09red/K01253%09red/K00129%09red/K00799%09red/K00121%09red
Histidine metabolism	KEGG PATHWAY	ko00340	8	74	3.13009e-05	0.001925	Cluster-54524.111298|Cluster-54524.115048|Cluster-54524.95001|Cluster-54524.111538|Cluster-54524.93234|Cluster-54524.82554|Cluster-54524.105764|Cluster-54524.46256	http://www.genome.jp/kegg-bin/show_pathway?ko00340/K00128%09red/K00129%09red/K00149%09red
Other glycan degradation	KEGG PATHWAY	ko00511	8	79	4.80817e-05	0.00236562	Cluster-54524.108149|Cluster-54524.119705|Cluster-54524.119706|Cluster-54524.108150|Cluster-54524.69806|Cluster-54524.114634|Cluster-54524.114635|Cluster-54524.54864	http://www.genome.jp/kegg-bin/show_pathway?ko00511/K12309%09red/K01191%09red/K12373%09red/K12311%09red
Valine, leucine and isoleucine degradation	KEGG PATHWAY	ko00280	11	173	0.000109159	0.00447552	Cluster-54524.105764|Cluster-54524.94337|Cluster-54524.108602|Cluster-54524.95001|Cluster-54524.114684|Cluster-54524.99579|Cluster-54524.48931|Cluster-54524.93234|Cluster-54524.115048|Cluster-54524.82554|Cluster-54524.46256	http://www.genome.jp/kegg-bin/show_pathway?ko00280/K05606%09red/K05607%09red/K01966%09red/K00149%09red/K00128%09red/K00248%09red/K01965%09red
Glutathione metabolism	KEGG PATHWAY	ko00480	12	224	0.000246785	0.0076453	Cluster-54524.85863|Cluster-54524.72401|Cluster-54524.131665|Cluster-54524.88917|Cluster-54524.104673|Cluster-54524.58051|Cluster-54524.102248|Cluster-54524.89109|Cluster-54524.93725|Cluster-54524.101414|Cluster-54524.81053|Cluster-54524.107727	http://www.genome.jp/kegg-bin/show_pathway?ko00480/K01469%09red/K13299%09red/K05360%09red/K00799%09red/K00432%09red/K01920%09red/K00031%09red
Peroxisome	KEGG PATHWAY	ko04146	14	297	0.000274651	0.0076453	Cluster-54524.85863|Cluster-54524.90609|Cluster-54524.92178|Cluster-54524.127081|Cluster-54524.156868|Cluster-54524.88718|Cluster-54524.104387|Cluster-54524.92439|Cluster-54524.91179|Cluster-54524.76103|Cluster-54524.93725|Cluster-54524.61633|Cluster-54524.101414|Cluster-54524.81499	http://www.genome.jp/kegg-bin/show_pathway?ko04146/K00869%09red/K13355%09red/K13348%09red/K00272%09red/K13299%09red/K13339%09red/K01796%09red/K04564%09red/K00031%09red
Chemical carcinogenesis	KEGG PATHWAY	ko05204	11	194	0.000279706	0.0076453	Cluster-54524.90944|Cluster-54524.111298|Cluster-54524.97210|Cluster-54524.104673|Cluster-54524.92250|Cluster-54524.94352|Cluster-54524.111538|Cluster-54524.102248|Cluster-54524.131665|Cluster-54524.101414|Cluster-54524.107727	http://www.genome.jp/kegg-bin/show_pathway?ko05204/K00816%09red/K13299%09red/K01253%09red/K00129%09red/K00799%09red/K00121%09red
Glycerolipid metabolism	KEGG PATHWAY	ko00561	10	172	0.000433868	0.0106732	Cluster-54524.99729|Cluster-54524.115048|Cluster-54524.95001|Cluster-54524.91786|Cluster-54524.90466|Cluster-54524.88091|Cluster-54524.93234|Cluster-54524.82554|Cluster-54524.105764|Cluster-54524.46256	http://www.genome.jp/kegg-bin/show_pathway?ko00561/K00128%09red/K12298%09red/K00149%09red/K14073%09red/K00901%09red
Amino sugar and nucleotide sugar metabolism	KEGG PATHWAY	ko00520	10	190	0.000899478	0.0198129	Cluster-54524.92236|Cluster-54524.78588|Cluster-54524.69860|Cluster-54524.102814|Cluster-54524.69806|Cluster-54524.106050|Cluster-54524.111403|Cluster-54524.92245|Cluster-54524.98190|Cluster-54524.107010	http://www.genome.jp/kegg-bin/show_pathway?ko00520/K00965%09red/K02377%09red/K00963%09red/K01835%09red/K05305%09red/K01836%09red/K12373%09red/K02564%09red/K01810%09red/K17497%09red
Insect hormone biosynthesis	KEGG PATHWAY	ko00981	3	11	0.00105468	0.0198129	Cluster-54524.96154|Cluster-54524.91949|Cluster-54524.91948	http://www.genome.jp/kegg-bin/show_pathway?ko00981/K10721%09red/K14985%09red
Arachidonic acid metabolism	KEGG PATHWAY	ko00590	7	99	0.00107092	0.0198129	Cluster-54524.93221|Cluster-54524.98135|Cluster-54524.88917|Cluster-54524.66370|Cluster-54524.125260|Cluster-54524.89109|Cluster-54524.92340	http://www.genome.jp/kegg-bin/show_pathway?ko00590/K01254%09red/K01830%09red/K16343%09red/K16342%09red/K00432%09red/K07422%09red
Drug metabolism - cytochrome P450	KEGG PATHWAY	ko00982	8	130	0.00112756	0.0198129	Cluster-54524.111298|Cluster-54524.97210|Cluster-54524.104673|Cluster-54524.111538|Cluster-54524.102248|Cluster-54524.131665|Cluster-54524.101414|Cluster-54524.107727	http://www.genome.jp/kegg-bin/show_pathway?ko00982/K00121%09red/K13299%09red/K00799%09red/K00129%09red
beta-Alanine metabolism	KEGG PATHWAY	ko00410	8	133	0.00129426	0.0212259	Cluster-54524.111298|Cluster-54524.115048|Cluster-54524.95001|Cluster-54524.111538|Cluster-54524.93234|Cluster-54524.82554|Cluster-54524.105764|Cluster-54524.46256	http://www.genome.jp/kegg-bin/show_pathway?ko00410/K00128%09red/K00129%09red/K00149%09red
Tryptophan metabolism	KEGG PATHWAY	ko00380	8	140	0.00175981	0.027057	Cluster-54524.115048|Cluster-54524.84622|Cluster-54524.95001|Cluster-54524.94352|Cluster-54524.93234|Cluster-54524.82554|Cluster-54524.105764|Cluster-54524.46256	http://www.genome.jp/kegg-bin/show_pathway?ko00380/K00128%09red/K00149%09red/K03392%09red/K00816%09red
Pentose and glucuronate interconversions	KEGG PATHWAY	ko00040	8	151	0.00274832	0.0397698	Cluster-54524.92236|Cluster-54524.99703|Cluster-54524.99702|Cluster-54524.81301|Cluster-54524.93234|Cluster-54524.82554|Cluster-54524.95001|Cluster-54524.105493	http://www.genome.jp/kegg-bin/show_pathway?ko00040/K00128%09red/K03331%09red/K00078%09red/K13247%09red/K00963%09red
Hypertrophic cardiomyopathy (HCM)	KEGG PATHWAY	ko05410	8	155	0.00319929	0.0437236	Cluster-54524.89126|Cluster-54524.105363|Cluster-54524.101994|Cluster-54524.127708|Cluster-54524.103218|Cluster-54524.105786|Cluster-54524.103522|Cluster-54524.89681	http://www.genome.jp/kegg-bin/show_pathway?ko05410/K05719%09red/K06484%09red/K05692%09red/K06493%09red/K06483%09red/K06590%09red/K01283%09red
Glycosphingolipid biosynthesis - ganglio series	KEGG PATHWAY	ko00604	4	39	0.00378056	0.0489483	Cluster-54524.108149|Cluster-54524.69806|Cluster-54524.54864|Cluster-54524.108150	http://www.genome.jp/kegg-bin/show_pathway?ko00604/K12309%09red/K12373%09red
D vs E UP
Valine, leucine and isoleucine degradation	KEGG PATHWAY	ko00280	21	173	2.39888e-13	4.9417e-11	Cluster-54524.100402|Cluster-54524.136484|Cluster-54524.49124|Cluster-54524.94337|Cluster-54524.53151|Cluster-54524.102263|Cluster-54524.107278|Cluster-54524.108601|Cluster-54524.107009|Cluster-54524.101932|Cluster-54524.93956|Cluster-54524.117209|Cluster-54524.88194|Cluster-54524.99579|Cluster-54524.86510|Cluster-54524.93234|Cluster-54524.114683|Cluster-54524.115048|Cluster-54524.50052|Cluster-5…	http://www.genome.jp/kegg-bin/show_pathway?ko00280/K08683%09red/K07513%09red/K05606%09red/K05607%09red/K18660%09red/K00167%09red/K11538%09red/K00149%09red/K00827%09red/K01847%09red/K07508%09red/K00128%09red/K01966%09red/K01965%09red/K07511%09red/K07515%09red/K09699%09red/K00626%09red/K01968%09red
Pyruvate metabolism	KEGG PATHWAY	ko00620	16	183	1.29865e-08	1.33761e-06	Cluster-54524.100402|Cluster-54524.70132|Cluster-54524.100259|Cluster-54524.107277|Cluster-54524.111577|Cluster-54524.107278|Cluster-54524.100256|Cluster-54524.89548|Cluster-54524.86795|Cluster-54524.94380|Cluster-54524.98982|Cluster-54524.93234|Cluster-54524.115048|Cluster-54524.104847|Cluster-54524.89062|Cluster-54524.90530	http://www.genome.jp/kegg-bin/show_pathway?ko00620/K00128%09red/K00049%09red/K01069%09red/K01679%09red/K00149%09red/K01759%09red/K00162%09red/K01596%09red/K00627%09red/K00626%09red
Amino sugar and nucleotide sugar metabolism	KEGG PATHWAY	ko00520	15	190	1.27252e-07	8.73798e-06	Cluster-54524.92236|Cluster-54524.114564|Cluster-54524.69860|Cluster-54524.81159|Cluster-54524.98190|Cluster-54524.91637|Cluster-54524.91400|Cluster-54524.111403|Cluster-54524.89250|Cluster-54524.115054|Cluster-54524.104613|Cluster-54524.101511|Cluster-54524.106050|Cluster-54524.107010|Cluster-54524.107011	http://www.genome.jp/kegg-bin/show_pathway?ko00520/K00965%09red/K00326%09red/K00963%09red/K01835%09red/K00849%09red/K01836%09red/K02564%09red/K01784%09red/K02377%09red/K00012%09red/K05305%09red/K17497%09red
Glycolysis / Gluconeogenesis	KEGG PATHWAY	ko00010	18	286	1.80665e-07	9.30425e-06	Cluster-54524.89939|Cluster-54524.90507|Cluster-54524.100402|Cluster-54524.111298|Cluster-54524.101939|Cluster-54524.89922|Cluster-54524.89548|Cluster-54524.89062|Cluster-54524.91637|Cluster-54524.111538|Cluster-54524.94380|Cluster-54524.86795|Cluster-54524.98982|Cluster-54524.93234|Cluster-54524.115048|Cluster-54524.87704|Cluster-54524.89246|Cluster-54524.90530	http://www.genome.jp/kegg-bin/show_pathway?ko00010/K00128%09red/K00850%09red/K01689%09red/K01835%09red/K01834%09red/K00149%09red/K00162%09red/K01596%09red/K00129%09red/K01785%09red/K01623%09red/K00927%09red/K00627%09red
Propanoate metabolism	KEGG PATHWAY	ko00640	12	125	3.34127e-07	1.3766e-05	Cluster-54524.76805|Cluster-54524.107277|Cluster-54524.94337|Cluster-54524.107278|Cluster-54524.108601|Cluster-54524.107009|Cluster-54524.117209|Cluster-54524.114683|Cluster-54524.86510|Cluster-54524.102263|Cluster-54524.115068|Cluster-54524.50052	http://www.genome.jp/kegg-bin/show_pathway?ko00640/K05606%09red/K01966%09red/K00167%09red/K07515%09red/K01900%09red/K01965%09red/K01578%09red/K07511%09red/K01847%09red/K09699%09red/K00626%09red
Glyoxylate and dicarboxylate metabolism	KEGG PATHWAY	ko00630	14	185	5.34648e-07	1.83562e-05	Cluster-54524.112805|Cluster-54524.132451|Cluster-54524.97119|Cluster-54524.94337|Cluster-54524.114597|Cluster-54524.114596|Cluster-54524.107278|Cluster-54524.108601|Cluster-54524.104325|Cluster-54524.114683|Cluster-54524.104847|Cluster-54524.105101|Cluster-54524.50052|Cluster-54524.107277	http://www.genome.jp/kegg-bin/show_pathway?ko00630/K03781%09red/K00049%09red/K05606%09red/K01966%09red/K00281%09red/K18123%09red/K01816%09red/K01965%09red/K00605%09red/K00830%09red/K01847%09red/K00626%09red
N-Glycan biosynthesis	KEGG PATHWAY	ko00510	10	104	3.12888e-06	9.20783e-05	Cluster-54524.87791|Cluster-54524.101098|Cluster-54524.108368|Cluster-54524.93404|Cluster-54524.91527|Cluster-54524.96268|Cluster-54524.92842|Cluster-54524.74334|Cluster-54524.134366|Cluster-54524.96271	http://www.genome.jp/kegg-bin/show_pathway?ko00510/K12666%09red/K12667%09red/K03847%09red/K12668%09red/K12669%09red/K00717%09red/K07151%09red/K12670%09red
Glycine, serine and threonine metabolism	KEGG PATHWAY	ko00260	13	197	5.54271e-06	0.000128271	Cluster-54524.112287|Cluster-54524.132451|Cluster-54524.97119|Cluster-54524.49124|Cluster-54524.131658|Cluster-54524.104325|Cluster-54524.92105|Cluster-54524.48208|Cluster-54524.104847|Cluster-54524.134170|Cluster-54524.131655|Cluster-54524.89246|Cluster-54524.90971	http://www.genome.jp/kegg-bin/show_pathway?ko00260/K00049%09red/K00058%09red/K00830%09red/K01834%09red/K00281%09red/K01620%09red/K00827%09red/K00605%09red/K00108%09red/K00552%09red/K12235%09red
Peroxisome	KEGG PATHWAY	ko04146	16	297	5.69453e-06	0.000128271	Cluster-54524.112805|Cluster-54524.53400|Cluster-54524.62281|Cluster-54524.93148|Cluster-54524.104387|Cluster-54524.76805|Cluster-54524.92439|Cluster-54524.91179|Cluster-54524.93778|Cluster-54524.76103|Cluster-54524.72597|Cluster-54524.136484|Cluster-54524.82188|Cluster-54524.114833|Cluster-54524.89072|Cluster-54524.97119	http://www.genome.jp/kegg-bin/show_pathway?ko04146/K03781%09red/K04564%09red/K13348%09red/K13353%09red/K13337%09red/K12663%09red/K13339%09red/K13299%09red/K00869%09red/K01578%09red/K00830%09red/K07753%09red/K07513%09red/K00031%09red
Tryptophan metabolism	KEGG PATHWAY	ko00380	11	140	6.22672e-06	0.000128271	Cluster-54524.100402|Cluster-54524.107277|Cluster-54524.84622|Cluster-54524.107278|Cluster-54524.112805|Cluster-54524.94352|Cluster-54524.86510|Cluster-54524.102263|Cluster-54524.93234|Cluster-54524.115048|Cluster-54524.91899	http://www.genome.jp/kegg-bin/show_pathway?ko00380/K03781%09red/K00128%09red/K00149%09red/K07515%09red/K00825%09red/K03392%09red/K00816%09red/K07511%09red/K00626%09red
Glutathione metabolism	KEGG PATHWAY	ko00480	13	224	2.01584e-05	0.000377513	Cluster-54524.72401|Cluster-54524.99269|Cluster-54524.49186|Cluster-54524.93148|Cluster-54524.109285|Cluster-54524.72400|Cluster-54524.104673|Cluster-54524.89109|Cluster-54524.72597|Cluster-54524.88917|Cluster-54524.107727|Cluster-54524.81053|Cluster-54524.67507	http://www.genome.jp/kegg-bin/show_pathway?ko00480/K13299%09red/K01255%09red/K05360%09red/K11140%09red/K00799%09red/K00432%09red/K00031%09red/K01469%09red
beta-Alanine metabolism	KEGG PATHWAY	ko00410	10	133	2.32878e-05	0.000399773	Cluster-54524.76805|Cluster-54524.111298|Cluster-54524.100402|Cluster-54524.111538|Cluster-54524.46075|Cluster-54524.86510|Cluster-54524.93234|Cluster-54524.76032|Cluster-54524.115048|Cluster-54524.102263	http://www.genome.jp/kegg-bin/show_pathway?ko00410/K00149%09red/K00128%09red/K00129%09red/K01464%09red/K01578%09red/K01431%09red/K07511%09red/K07515%09red
Fatty acid degradation	KEGG PATHWAY	ko00071	11	188	8.02662e-05	0.00113349	Cluster-54524.100402|Cluster-54524.107277|Cluster-54524.109088|Cluster-54524.107278|Cluster-54524.117485|Cluster-54524.136484|Cluster-54524.88194|Cluster-54524.86510|Cluster-54524.102263|Cluster-54524.93234|Cluster-54524.115048	http://www.genome.jp/kegg-bin/show_pathway?ko00071/K07515%09red/K07513%09red/K00149%09red/K07508%09red/K00128%09red/K07511%09red/K08765%09red/K00626%09red
Ubiquinone and other terpenoid-quinone biosynthesis	KEGG PATHWAY	ko00130	5	29	8.18018e-05	0.00113349	Cluster-54524.91064|Cluster-54524.91856|Cluster-54524.79273|Cluster-54524.45901|Cluster-54524.97931	http://www.genome.jp/kegg-bin/show_pathway?ko00130/K06126%09red/K06127%09red/K00591%09red/K10106%09red
Metabolism of xenobiotics by cytochrome P450	KEGG PATHWAY	ko00980	10	156	8.25357e-05	0.00113349	Cluster-54524.90944|Cluster-54524.111298|Cluster-54524.99703|Cluster-54524.99269|Cluster-54524.49186|Cluster-54524.104673|Cluster-54524.111538|Cluster-54524.72597|Cluster-54524.107727|Cluster-54524.99702	http://www.genome.jp/kegg-bin/show_pathway?ko00980/K00129%09red/K00078%09red/K00799%09red/K01253%09red/K13299%09red
Aminoacyl-tRNA biosynthesis	KEGG PATHWAY	ko00970	11	200	0.000134734	0.0017347	Cluster-54524.109395|Cluster-54524.96362|Cluster-54524.110594|Cluster-54524.92153|Cluster-54524.86746|Cluster-54524.95182|Cluster-54524.116746|Cluster-54524.104569|Cluster-54524.104568|Cluster-54524.83906|Cluster-54524.109968	http://www.genome.jp/kegg-bin/show_pathway?ko00970/K01880%09red/K01870%09red/K01872%09red/K01875%09red/K01874%09red/K01889%09red/K01869%09red/K00604%09red
Glycerolipid metabolism	KEGG PATHWAY	ko00561	10	172	0.000175853	0.00213093	Cluster-54524.100402|Cluster-54524.109900|Cluster-54524.109901|Cluster-54524.62147|Cluster-54524.123633|Cluster-54524.90466|Cluster-54524.88091|Cluster-54524.93234|Cluster-54524.90011|Cluster-54524.115048	http://www.genome.jp/kegg-bin/show_pathway?ko00561/K00149%09red/K00128%09red/K12298%09red/K00629%09red/K13513%09red/K14074%09red/K14073%09red
Terpenoid backbone biosynthesis	KEGG PATHWAY	ko00900	6	61	0.000267482	0.00306118	Cluster-54524.95033|Cluster-54524.107277|Cluster-54524.97233|Cluster-54524.93778|Cluster-54524.76843|Cluster-54524.107278	http://www.genome.jp/kegg-bin/show_pathway?ko00900/K00869%09red/K05906%09red/K00626%09red/K00787%09red
Citrate cycle (TCA cycle)	KEGG PATHWAY	ko00020	11	220	0.000294662	0.00319476	Cluster-54524.100259|Cluster-54524.93148|Cluster-54524.100256|Cluster-54524.89548|Cluster-54524.89062|Cluster-54524.94380|Cluster-54524.98982|Cluster-54524.97395|Cluster-54524.115068|Cluster-54524.86795|Cluster-54524.90530	http://www.genome.jp/kegg-bin/show_pathway?ko00020/K01679%09red/K00162%09red/K01596%09red/K01900%09red/K00627%09red/K00030%09red/K00031%09red
Galactose metabolism	KEGG PATHWAY	ko00052	8	130	0.000539522	0.00555708	Cluster-54524.92236|Cluster-54524.90507|Cluster-54524.114564|Cluster-54524.91637|Cluster-54524.115054|Cluster-54524.101939|Cluster-54524.107010|Cluster-54524.107011	http://www.genome.jp/kegg-bin/show_pathway?ko00052/K00965%09red/K00850%09red/K00963%09red/K01835%09red/K00849%09red/K01785%09red/K01784%09red
Arginine and proline metabolism	KEGG PATHWAY	ko00330	9	168	0.000642258	0.00630024	Cluster-54524.100402|Cluster-54524.114597|Cluster-54524.114596|Cluster-54524.136478|Cluster-54524.93234|Cluster-54524.115048|Cluster-54524.115092|Cluster-54524.89825|Cluster-54524.116053	http://www.genome.jp/kegg-bin/show_pathway?ko00330/K00286%09red/K14455%09red/K14454%09red/K00149%09red/K18123%09red/K00128%09red/K00472%09red
Pentose and glucuronate interconversions	KEGG PATHWAY	ko00040	8	151	0.0013535	0.0126737	Cluster-54524.92236|Cluster-54524.100402|Cluster-54524.99703|Cluster-54524.99702|Cluster-54524.81301|Cluster-54524.93234|Cluster-54524.101511|Cluster-54524.105493	http://www.genome.jp/kegg-bin/show_pathway?ko00040/K00963%09red/K03331%09red/K00078%09red/K00128%09red/K00012%09red/K13247%09red
Chemical carcinogenesis	KEGG PATHWAY	ko05204	9	194	0.00167542	0.015006	Cluster-54524.90944|Cluster-54524.111298|Cluster-54524.99269|Cluster-54524.49186|Cluster-54524.104673|Cluster-54524.94352|Cluster-54524.111538|Cluster-54524.72597|Cluster-54524.107727	http://www.genome.jp/kegg-bin/show_pathway?ko05204/K00816%09red/K00129%09red/K00799%09red/K01253%09red/K13299%09red
One carbon pool by folate	KEGG PATHWAY	ko00670	6	90	0.00179892	0.0154407	Cluster-54524.96659|Cluster-54524.96670|Cluster-54524.100055|Cluster-54524.116746|Cluster-54524.132451|Cluster-54524.102075	http://www.genome.jp/kegg-bin/show_pathway?ko00670/K00297%09red/K00605%09red/K11787%09red/K00604%09red
Alanine, aspartate and glutamate metabolism	KEGG PATHWAY	ko00250	7	125	0.00197943	0.0163105	Cluster-54524.80630|Cluster-54524.87797|Cluster-54524.97119|Cluster-54524.49124|Cluster-54524.131775|Cluster-54524.89825|Cluster-54524.116053	http://www.genome.jp/kegg-bin/show_pathway?ko00250/K01755%09red/K00261%09red/K14455%09red/K14454%09red/K00139%09red/K00827%09red/K00830%09red
Protein processing in endoplasmic reticulum	KEGG PATHWAY	ko04141	18	612	0.00220558	0.017475	Cluster-54524.91125|Cluster-54524.87791|Cluster-54524.101098|Cluster-54524.109919|Cluster-54524.108368|Cluster-54524.93404|Cluster-54524.93816|Cluster-54524.91527|Cluster-54524.92313|Cluster-54524.41437|Cluster-54524.74719|Cluster-54524.96268|Cluster-54524.92842|Cluster-54524.76390|Cluster-54524.103078|Cluster-54524.74091|Cluster-54524.95927|Cluster-54524.96271	http://www.genome.jp/kegg-bin/show_pathway?ko04141/K09580%09red/K12669%09red/K12666%09red/K12667%09red/K12668%09red/K08056%09red/K08288%09red/K07151%09red/K12670%09red/K04079%09red/K09490%09red/K11718%09red/K14009%09red/K14007%09red/K03283%09red
Phenylalanine metabolism	KEGG PATHWAY	ko00360	4	38	0.00229986	0.0175471	Cluster-54524.111538|Cluster-54524.111298|Cluster-54524.89825|Cluster-54524.116053	http://www.genome.jp/kegg-bin/show_pathway?ko00360/K00129%09red/K14455%09red/K14454%09red
Drug metabolism - cytochrome P450	KEGG PATHWAY	ko00982	7	130	0.00244162	0.0179633	Cluster-54524.111298|Cluster-54524.99269|Cluster-54524.49186|Cluster-54524.104673|Cluster-54524.111538|Cluster-54524.72597|Cluster-54524.107727	http://www.genome.jp/kegg-bin/show_pathway?ko00982/K00129%09red/K00799%09red/K13299%09red
Glycosphingolipid biosynthesis - lacto and neolacto series	KEGG PATHWAY	ko00601	3	20	0.00337172	0.0238213	Cluster-54524.74947|Cluster-54524.45290|Cluster-54524.60971	http://www.genome.jp/kegg-bin/show_pathway?ko00601/K07633%09red/K00741%09red/K00718%09red
Purine metabolism	KEGG PATHWAY	ko00230	15	490	0.00346913	0.0238213	Cluster-54524.78950|Cluster-54524.104027|Cluster-54524.44961|Cluster-54524.96659|Cluster-54524.104891|Cluster-54524.91637|Cluster-54524.100055|Cluster-54524.101354|Cluster-54524.70481|Cluster-54524.87710|Cluster-54524.115735|Cluster-54524.91952|Cluster-54524.79454|Cluster-54524.90794|Cluster-54524.102075	http://www.genome.jp/kegg-bin/show_pathway?ko00230/K01518%09red/K01519%09red/K01835%09red/K01587%09red/K00364%09red/K00760%09red/K03016%09red/K00759%09red/K00939%09red/K00940%09red/K11787%09red/K07127%09red
Histidine metabolism	KEGG PATHWAY	ko00340	5	74	0.0040644	0.0261834	Cluster-54524.93234|Cluster-54524.115048|Cluster-54524.111298|Cluster-54524.111538|Cluster-54524.100402	http://www.genome.jp/kegg-bin/show_pathway?ko00340/K00128%09red/K00129%09red/K00149%09red
PPAR signaling pathway	KEGG PATHWAY	ko03320	8	182	0.00406732	0.0261834	Cluster-54524.110600|Cluster-54524.109088|Cluster-54524.89548|Cluster-54524.106678|Cluster-54524.117485|Cluster-54524.136484|Cluster-54524.89062|Cluster-54524.90530	http://www.genome.jp/kegg-bin/show_pathway?ko03320/K01596%09red/K06276%09red/K08526%09red/K07513%09red/K08765%09red
Fat digestion and absorption	KEGG PATHWAY	ko04975	5	76	0.00452214	0.0282291	Cluster-54524.62147|Cluster-54524.90011|Cluster-54524.90466|Cluster-54524.88091|Cluster-54524.116053	http://www.genome.jp/kegg-bin/show_pathway?ko04975/K12298%09red/K14074%09red/K14455%09red/K14073%09red
Butanoate metabolism	KEGG PATHWAY	ko00650	5	80	0.00554557	0.0335996	Cluster-54524.80630|Cluster-54524.107278|Cluster-54524.107277|Cluster-54524.86510|Cluster-54524.102263	http://www.genome.jp/kegg-bin/show_pathway?ko00650/K07511%09red/K00626%09red/K00139%09red/K07515%09red
Tyrosine metabolism	KEGG PATHWAY	ko00350	5	82	0.0061141	0.0359859	Cluster-54524.84693|Cluster-54524.111538|Cluster-54524.111298|Cluster-54524.89825|Cluster-54524.116053	http://www.genome.jp/kegg-bin/show_pathway?ko00350/K01800%09red/K00129%09red/K14455%09red/K14454%09red
D vs E DOWN
Phosphatidylinositol signaling system	KEGG PATHWAY	ko04070	13	240	2.17975e-05	0.00266162	Cluster-54524.89782|Cluster-54524.87864|Cluster-54524.92774|Cluster-54524.85085|Cluster-54524.64234|Cluster-54524.90392|Cluster-54524.106996|Cluster-54524.64238|Cluster-54524.64237|Cluster-54524.108557|Cluster-54524.90569|Cluster-54524.102256|Cluster-54524.73890	http://www.genome.jp/kegg-bin/show_pathway?ko04070/K02677%09red/K05860%09red/K13711%09red/K13024%09red/K02183%09red/K05858%09red
Aldosterone synthesis and secretion	KEGG PATHWAY	ko04925	12	210	2.72986e-05	0.00266162	Cluster-54524.89782|Cluster-54524.65642|Cluster-54524.98533|Cluster-54524.90392|Cluster-54524.78810|Cluster-54524.113106|Cluster-54524.117868|Cluster-54524.102256|Cluster-54524.85085|Cluster-54524.123867|Cluster-54524.73890|Cluster-54524.106996	http://www.genome.jp/kegg-bin/show_pathway?ko04925/K06070%09red/K02677%09red/K08048%09red/K12323%09red/K02183%09red/K05858%09red
Gastric acid secretion	KEGG PATHWAY	ko04971	10	184	0.000184665	0.011178	Cluster-54524.89782|Cluster-54524.85085|Cluster-54524.91835|Cluster-54524.90392|Cluster-54524.106996|Cluster-54524.113106|Cluster-54524.117868|Cluster-54524.102256|Cluster-54524.123867|Cluster-54524.73890	http://www.genome.jp/kegg-bin/show_pathway?ko04971/K02677%09red/K13855%09red/K05858%09red/K08048%09red/K02183%09red
Vascular smooth muscle contraction	KEGG PATHWAY	ko04270	13	307	0.00023159	0.011178	Cluster-54524.89782|Cluster-54524.98533|Cluster-54524.119589|Cluster-54524.77269|Cluster-54524.78810|Cluster-54524.113106|Cluster-54524.102256|Cluster-54524.117868|Cluster-54524.90392|Cluster-54524.85085|Cluster-54524.123867|Cluster-54524.73890|Cluster-54524.106996	http://www.genome.jp/kegg-bin/show_pathway?ko04270/K02677%09red/K08048%09red/K04368%09red/K12323%09red/K01047%09red/K02183%09red/K05858%09red
GnRH signaling pathway	KEGG PATHWAY	ko04912	11	233	0.000286614	0.011178	Cluster-54524.89782|Cluster-54524.113106|Cluster-54524.85085|Cluster-54524.77269|Cluster-54524.106996|Cluster-54524.112592|Cluster-54524.117868|Cluster-54524.90392|Cluster-54524.102256|Cluster-54524.123867|Cluster-54524.73890	http://www.genome.jp/kegg-bin/show_pathway?ko04912/K02677%09red/K08048%09red/K04368%09red/K02183%09red/K04375%09red/K05858%09red
Long-term potentiation	KEGG PATHWAY	ko04720	10	220	0.000706198	0.0229514	Cluster-54524.89782|Cluster-54524.85085|Cluster-54524.77269|Cluster-54524.106996|Cluster-54524.113106|Cluster-54524.117868|Cluster-54524.90392|Cluster-54524.102256|Cluster-54524.123867|Cluster-54524.73890	http://www.genome.jp/kegg-bin/show_pathway?ko04720/K02677%09red/K04368%09red/K05858%09red/K08048%09red/K02183%09red
Salivary secretion	KEGG PATHWAY	ko04970	10	229	0.000945784	0.023792	Cluster-54524.89782|Cluster-54524.85085|Cluster-54524.91835|Cluster-54524.90392|Cluster-54524.106996|Cluster-54524.113106|Cluster-54524.117868|Cluster-54524.102256|Cluster-54524.123867|Cluster-54524.73890	http://www.genome.jp/kegg-bin/show_pathway?ko04970/K02677%09red/K13855%09red/K05858%09red/K08048%09red/K02183%09red
Circadian entrainment	KEGG PATHWAY	ko04713	10	230	0.000976084	0.023792	Cluster-54524.89782|Cluster-54524.85085|Cluster-54524.90392|Cluster-54524.106996|Cluster-54524.113106|Cluster-54524.82699|Cluster-54524.117868|Cluster-54524.102256|Cluster-54524.123867|Cluster-54524.73890	http://www.genome.jp/kegg-bin/show_pathway?ko04713/K02677%09red/K05858%09red/K08048%09red/K04547%09red/K02183%09red
Melanogenesis	KEGG PATHWAY	ko04916	10	234	0.00110534	0.023949	Cluster-54524.89782|Cluster-54524.85085|Cluster-54524.77269|Cluster-54524.106996|Cluster-54524.113106|Cluster-54524.117868|Cluster-54524.90392|Cluster-54524.102256|Cluster-54524.123867|Cluster-54524.73890	http://www.genome.jp/kegg-bin/show_pathway?ko04916/K02677%09red/K04368%09red/K05858%09red/K08048%09red/K02183%09red
Inflammatory mediator regulation of TRP channels	KEGG PATHWAY	ko04750	10	239	0.00128624	0.0250816	Cluster-54524.89782|Cluster-54524.103825|Cluster-54524.85085|Cluster-54524.90392|Cluster-54524.106996|Cluster-54524.113106|Cluster-54524.117868|Cluster-54524.102256|Cluster-54524.123867|Cluster-54524.73890	http://www.genome.jp/kegg-bin/show_pathway?ko04750/K02677%09red/K05858%09red/K08048%09red/K04261%09red/K02183%09red
Retrograde endocannabinoid signaling	KEGG PATHWAY	ko04723	8	162	0.00143286	0.0254007	Cluster-54524.85085|Cluster-54524.106996|Cluster-54524.113106|Cluster-54524.82699|Cluster-54524.117868|Cluster-54524.102256|Cluster-54524.123867|Cluster-54524.73890	http://www.genome.jp/kegg-bin/show_pathway?ko04723/K02677%09red/K08048%09red/K04547%09red/K05858%09red
Oxytocin signaling pathway	KEGG PATHWAY	ko04921	14	444	0.00215488	0.0350167	Cluster-54524.89782|Cluster-54524.113106|Cluster-54524.98533|Cluster-54524.77269|Cluster-54524.95688|Cluster-54524.112592|Cluster-54524.102256|Cluster-54524.117868|Cluster-54524.90392|Cluster-54524.85085|Cluster-54524.123867|Cluster-54524.73890|Cluster-54524.106996|Cluster-54524.78810	http://www.genome.jp/kegg-bin/show_pathway?ko04921/K02677%09red/K08048%09red/K04368%09red/K12323%09red/K08292%09red/K02183%09red/K04375%09red/K05858%09red
PPAR signaling pathway	KEGG PATHWAY	ko03320	8	182	0.00286266	0.0429399	Cluster-54524.97377|Cluster-54524.85459|Cluster-54524.98100|Cluster-54524.90512|Cluster-54524.100214|Cluster-54524.91311|Cluster-54524.91313|Cluster-54524.87613	http://www.genome.jp/kegg-bin/show_pathway?ko03320/K15013%09red/K00507%09red/K08765%09red
E vs A DOWN
One carbon pool by folate	KEGG PATHWAY	ko00670	4	90	2.82472e-06	0.00014971	Cluster-54524.96659|Cluster-54524.100055|Cluster-54524.102075|Cluster-54524.58318	http://www.genome.jp/kegg-bin/show_pathway?ko00670/K00605%09red/K11787%09red
Purine metabolism	KEGG PATHWAY	ko00230	4	490	0.00167312	0.0443377	Cluster-54524.96659|Cluster-54524.100055|Cluster-54524.83661|Cluster-54524.102075	http://www.genome.jp/kegg-bin/show_pathway?ko00230/K00106%09red/K11787%09red
